# Supplementary material for: Prediction of coronary heart disease in rural Chinese adults: a cross sectional study
Source: PeerJ. 2021 Oct 11;9:e12259. doi: 10.7717/peerj.12259 (PMC8515995; doi:10.7717/peerj.12259)
Supplement: Supplemental Information 2 — The raw data is showing basic information and disease outcomes for the 2,311 people who participated in the study. For more detail information, please contact the corresponding author [file peerj-09-12259-s002.xlsx]

## Sheet: Sheet1
Supplement table 2. Basic information of 2311 participants
SampleID	Gender1	Smoking2	Drinking3	Pressure4	BFR	VFI	Age	LDL_C	TG	TC	FBG	HbA1c	ALT	Creatinine	SBP	WHR	ECGNOTE	PSQI	Label5
400963	1	0	0	1	37.6	10	67	4.35	3.59	8.1	5.3	5.7	25	72	139	0.927423	3	2	1
406258	1	0	0	1	32.4	5	69	2.4	2	4.4	7.6	6.7	14	48	139.333	0.819149	3	7	1
406089	1	0	0	1	36.3	7	72	2.34	1.69	4.5	6.5	7.8	27	58	118.667	0.955556	3	5	1
405333	0	2	2	1	13.9	12	77	2.7	1.28	4.9	4.4	6.4	16	82	199.333	0.923913	3	1	1
405273	0	1	1	1	25.9	13	52	2.53	1.59	4.6	5.2	4.7	18	71	114	0.949495	1	1	0
404452	1	0	0	1	40.7	13	77	4.68	3.18	6.6	5.1	5.7	15	67	180.667	0.89	3	9	1
400155	1	0	0	1	41.3	11	70	4.35	1.21	6.3	6.1	5.1	35	46	170.667	0.910301	3	9	1
408495	0	2	1	3	30.8	15	62	2.38	2	4.7	5	5.5	14	70	157.667	0.977384	2	4	1
400269	0	2	1	1	22.5	7	59	3.52	1.15	6.2	6.1	5.5	15	64	164.333	0.937401	2	1	1
403116	0	1	0	1	25.4	12	53	2.59	2.36	4.6	6	6.5	20	62	123.667	1.00166	2	4	1
406464	1	0	0	1	36.5	12	64	2.15	1.12	4.2	5.6	5.9	16	65	126.667	0.949495	1	2	1
407513	0	0	0	1	25.9	13	63	2.65	0.8	4.8	5.57	6	12.31	67.53	111.333	0.974874	1	3	0
409641	1	0	0	2	33.5	9	35	2.33	0.86	4.1	5.1	5.4	12	50	130.667	0.806132	1	5	0
405406	1	0	0	1	32.9	7	54	3.32	1.04	5.7	5	5.4	16	71	93.3333	0.79	2	3	1
411786	1	0	0	1	35.8	7	54	2.19	1.49	4.6	5.2	5.7	11	51	125.667	0.832913	1	1	0
403274	1	0	0	1	30.7	4	51	2.79	1.1	5.1	5	5.7	19	62	95.6667	0.855636	1	1	1
409610	0	0	0	1	22.4	4	65	2.55	0.82	4.9	5.4	6	9	61	127.333	0.790601	1	2	0
400163	1	0	0	1	37.9	8	61	3.52	2.79	6.2	5.1	4.7	21	74	127.667	0.835112	3	7	1
403784	0	0	0	2	23.9	12	45	2.44	0.47	4.2	5.7	5	115	66	130	0.885714	1	3	0
409748	0	2	1	2	17.6	9	50	1.49	0.87	3.3	5.2	5.6	7	68	136.667	0.867837	1	2	0
405832	0	0	0	1	27.1	16	61	2.55	1.48	4.8	5.4	5.2	30	95	97.3333	0.95098	1	1	0
410568	0	0	0	1	32.4	24	75	3.23	1.68	5.1	6.2	6.6	17	61	118.667	1.01928	3	3	1
407625	1	0	0	1	44.6	16	73	4.68	2.32	8.1	5.6	6	25	60	144.333	0.970588	1	10	1
407531	1	0	0	1	37.3	12	54	2.96	1.3	5.2	5.36	6	17.71	61.69	106.667	0.853881	2	2	1
401813	0	2	1	1	26.3	15	74	3.67	0.83	7	5.5	4.9	14	73	184.333	0.882672	1	5	1
401926	0	1	1	4	29.3	14	60	2.54	1.51	5	5.4	5.6	16	74	167	0.964403	1	7	1
411072	1	0	0	2	34.7	7	44	2.2	0.79	4.5	4.7	5.4	8	55	101	0.821429	2	1	0
404432	1	0	0	1	38.2	12	54	4.54	1.34	5.7	5.3	5.7	40	55	131.667	0.928571	1	11	1
407151	0	2	2	2	29.6	10	67	3.43	1.69	5.8	3.7	6	16	76	155.667	1.09091	1	10	1
400276	1	0	1	1	36.1	4	37	3.03	0.81	5.1	6.2	4.9	21	59	118	0.840834	1	2	0
405348	1	0	0	1	36.9	13	57	1.73	1.02	3.8	4.9	5.1	21	46	125	0.9	1	5	1
402847	0	2	1	2	21.6	7	39	2.72	1.32	4.8	5.7	5.3	27	77	116.333	0.904497	1	5	0
402802	0	0	0	2	21.7	8	45	2.17	1.18	4.8	4.5	5.1	19	61	108	0.8569	2	2	0
403422	0	0	0	2	11.6	5	27	2.19	1.06	4.4	3.9	5.1	13	75	132	0.773767	1	3	0
405855	0	2	1	1	26.9	18	69	2.68	0.57	4.8	5.4	4.6	32	81	147	0.871287	2	3	1
402387	0	0	1	1	22.4	8	66	1.26	9.63	4.9	7.5	6.4	19	73	155	0.991314	3	4	1
411565	0	1	1	1	32.1	15	68	2.73	1.28	5.1	5	5.1	15	77	130.333	0.896733	1	4	0
410647	0	1	1	1	23.9	12	65	2.45	0.8	4.7	5	5.3	17	65	127.667	0.943152	2	4	0
411663	1	0	0	1	38.6	12	69	3.53	1.34	5.9	5.2	5.7	15	62	157	0.85952	1	4	1
402176	0	1	2	1	23.4	9	55	2.46	1.85	4.4	5.4	5.7	28	66	112.333	0.94251	1	5	1
409585	0	1	0	1	25.3	12	50	2.16	0.95	4.6	4.5	5.5	20	90	97.6667	0.951604	1	2	0
411675	0	1	0	1	24.3	9	54	2.56	0.87	4.4	3.9	5.1	21	58	128.333	0.82794	1	2	0
410271	1	0	0	1	29.6	3	53	1.97	0.5	4	5.1	4.9	14	51	135.667	0.826763	3	1	0
404385	1	0	0	3	35.9	8	66	3.14	2.96	4.4	5.2	5.7	22	75	122.333	0.956522	3	2	1
400815	1	0	0	2	39.8	10	58	3.71	1.18	5.2	5.5	5.7	24	59	141.333	0.955839	1	10	1
402650	0	0	0	1	24.2	12	47	2.25	1.04	4.2	5.6	5	18	59	137.333	0.933401	1	6	1
407715	0	0	0	1	21.7	8	70	2.49	0.57	4.9	5	6	31	56	129	0.774193	1	1	0
402051	1	0	0	1	39	13	50	2.09	1.03	4.7	5.4	4.5	44	55	120.333	0.871302	2	5	0
411632	1	0	0	3	26.6	4	37	1.94	0.69	4.3	4.96	5.7	13.89	55.89	95.3333	0.783537	1	2	0
401047	0	1	2	1	18.1	5	53	2.92	0.72	5.1	5.4	5.4	28	65	112.333	0.791981	1	5	0
406265	0	0	0	1	13.2	2	18	1.95	1.01	4.2	5.5	5.7	8	77	115.333	0.697917	1	2	0
402424	0	1	0	1	18.5	4	72	2.51	1.12	5.1	5.6	6.2	12	83	116	0.830286	1	14	0
400046	0	0	0	1	20	8	54	1.93	0.64	3.9	5	4.5	22	61	127	0.87234	1	4	0
403041	0	0	1	1	25.1	11	47	2.55	0.92	4.6	4.3	5.2	27	67	114.333	0.840849	1	1	0
411761	0	2	0	1	29.1	16	54	2.01	2.93	3.7	4.8	5.4	32	73	140	0.95448	2	1	1
409976	1	0	0	3	31.4	7	68	3.09	2.18	6.2	5.33	6	10.26	67.19	147.667	0.89122	1	4	1
411661	1	0	0	1	41.4	15	60	2.94	1.07	5.3	4.6	6.3	49	50	159.333	0.877503	2	3	1
404375	1	0	0	4	29.8	4	30	3.19	0.45	4.5	5.1	5.5	14	58	103.667	0.904255	1	3	0
402390	0	0	0	2	26.5	14	60	1.45	1.56	3.1	5.3	5.5	41	92	125.667	0.937339	1	5	1
410901	0	0	0	1	28.8	19	72	1.98	3.29	4.5	5.5	7.7	24	99	176.333	0.95212	3	2	1
407253	1	0	0	1	27.6	6	61	2.26	1.34	5	5.2	6	20	55	112.667	0.819149	1	2	0
402834	0	1	1	1	31.1	21	52	2.23	1.44	4	5.2	5.4	104	62	157	1.03136	3	6	1
409824	0	2	1	1	34.1	23	75	2.94	1.24	5.3	4.6	5.8	14	90	114	1.0911	1	3	1
401492	0	0	0	1	29.5	15	76	5.29	1.63	6.5	5.9	5.6	19	89	125.667	0.896918	1	4	1
402669	1	0	0	1	38.5	12	68	2.81	1.19	5.3	5.8	5.9	19	53	120.667	1.00494	2	1	1
400989	0	1	0	1	18.7	5	59	3.13	1.12	5.6	5.5	5.2	20	72	112.667	0.767857	1	8	1
400367	1	0	0	1	31.5	6	32	2.16	0.49	3.5	5.2	5.2	21	48	107.667	0.933497	1	1	0
410024	1	0	0	4	27.4	5	58	2.65	0.99	4.9	5.06	6.1	14.82	53.14	111.667	0.911715	1	8	0
410717	0	2	2	1	28.3	17	60	2.11	0.95	4.1	3.8	5.8	20	73	113.333	0.875186	1	4	1
409596	0	1	1	1	17.7	4	50	2.5	0.81	4.2	5.5	5.7	13	73	137.667	0.815562	1	3	0
406502	1	0	0	2	31.4	6	28	1.6	0.39	3.4	4.7	5.2	9	60	113	0.780952	2	2	0
411381	1	0	0	1	33.9	5	63	2.22	1.01	4.9	4.65	5.4	18.2	72.55	132	0.880888	1	13	1
406314	0	1	1	1	22.1	3	41	1.8	0.82	4.2	5.6	5.2	9	61	126.333	0.875	2	1	0
400348	0	1	0	4	17.2	8	40	2.06	0.66	4.2	5.1	4.7	13	81	113.333	0.854962	1	3	0
407838	1	0	0	1	27.9	3	50	2.79	1.21	5.1	5.4	5.4	26	56	118	0.717391	1	2	0
405388	0	0	0	3	14.1	2	27	1.91	0.83	3.9	4.8	5.1	12	84	110.333	0.64486	1	4	0
409826	0	1	0	1	29.9	22	63	3.12	0.76	4.8	5.1	5.8	21	70	155	0.985023	1	9	1
404958	0	1	1	1	33.7	21	68	2.58	1.6	4.8	5.4	5.5	27	72	127.667	0.990566	1	3	1
407695	0	1	0	1	27.3	12	65	2.7	1.41	4.7	6.2	6.7	31	74	145	0.888889	2	5	1
410351	1	0	0	1	46.1	24	69	3.01	2.01	5.4	6.1	6.2	20	67	118	0.960111	2	5	1
409603	0	0	2	1	29.3	18	68	2.6	0.97	4.5	6.7	6.7	29	89	110.667	1.00052	1	7	1
404836	0	1	0	1	27.4	18	79	2.77	2.33	5.2	5.1	5.4	18	78	157	0.960784	3	5	1
407075	1	0	0	1	39.9	12	80	2.87	1.32	5.5	5.5	6	15	62	163	1.04255	2	4	1
410021	1	0	0	1	34.2	6	63	3.31	1.66	5.8	4.4	5.9	18	54	133.667	0.896304	1	8	1
400084	1	0	0	3	39.3	14	61	2.6	1.04	4.4	5.9	5.1	22	59	126.333	0.824804	1	5	1
408460	0	2	0	2	25	9	75	2.41	0.79	4.6	4.84	5.5	16.92	91.64	150.333	0.778947	2	3	1
401157	1	0	0	1	35.2	10	53	3.45	2.42	5.2	5	5	41	51	126.333	0.940515	3	7	1
406991	0	2	2	1	31.1	3	75	1.86	1.5	3.8	5.6	5.8	21	74	120	0.813187	3	6	1
402707	1	0	0	1	31.7	8	48	2.13	1.07	4.4	5.06	5.2	6.91	56.8	111	0.874386	1	2	0
405193	0	1	1	1	17.1	6	31	1.92	0.78	3.8	4.7	4.7	10	80	108.333	0.869149	1	2	0
400198	0	1	1	1	19.8	10	68	2.61	0.73	4.3	5	4.7	20	62	125.667	0.904195	1	2	0
411132	0	0	0	1	29.9	16	65	2.58	1.38	4.6	5.4	6.2	20	70	136	0.922036	1	2	0
408040	1	0	0	1	31.3	5	29	1.12	0.47	2.8	4.8	4.8	14	51	111.667	0.822917	1	0	0
400653	0	1	1	1	12.6	7	40	2.96	1	4.7	5.2	5.1	19	78	124.667	0.842162	1	4	0
411368	0	0	0	1	22.8	10	35	1.97	0.8	3.9	5.37	5.4	37.07	83.81	127.333	0.903816	1	3	0
404042	0	0	0	1	21.9	8	60	2.78	0.8	4	5	5.1	14	72	111	0.861702	1	3	0
403950	0	1	1	2	20.3	12	30	3.03	1.04	4.7	5.2	5	19	73	122	0.865385	1	1	0
407781	0	1	0	1	18.9	6	51	1.76	0.73	4.3	5.6	6.1	14	58	96.3333	0.806452	2	3	0
403840	0	0	0	1	16.6	3	19	2.27	0.7	4.1	4.8	4.8	12	59	127.333	0.75	1	3	0
410609	1	0	0	1	37.1	9	51	2.38	0.93	4.2	4.8	5.7	14	51	103	0.899844	1	6	0
400405	0	1	0	2	24.9	7	60	2.42	0.66	4.5	4.6	4.9	18	83	118.333	0.859079	1	7	0
407682	0	1	2	1	33.5	11	62	2.21	0.75	4.3	5.1	6	34	87	120.667	0.892473	3	1	1
400683	1	0	0	1	37.6	9	72	6.29	1.99	8.4	10.7	8.8	10	54	147.333	0.869882	1	4	1
407504	0	0	0	1	28.7	23	64	1.39	1.75	2.8	5.37	6.6	15.85	98.92	166	0.939252	1	4	1
403405	1	0	0	2	34.7	9	61	2.99	2.54	6.1	5.8	5.5	22	58	124.333	0.912849	1	3	1
400083	0	2	2	1	25.3	14	59	1.84	4.21	4.6	5.9	5.7	45	73	146	0.898321	1	4	1
407959	0	0	0	1	33.4	15	72	2.2	1.38	4.3	9.5	6.8	11	96	139	1.02551	1	3	1
410659	1	0	0	1	29.7	15	57	2.48	0.89	4.7	7.1	7.4	40	47	106.333	0.868493	1	2	1
402950	0	0	1	3	29.1	19	25	2.95	0.91	4.8	5.28	5.2	67.21	67.61	123	0.922902	1	6	0
410608	1	0	0	1	37.9	10	60	2.94	1.21	5	6	6.1	34	59	119.667	0.894305	2	5	1
402803	0	1	0	5	31.4	16	44	2.73	1.44	4.8	5.8	5.4	67	70	116	0.956672	1	6	0
402136	0	2	2	1	20.7	9	57	2	1.11	4.2	5.4	5.7	34	71	111	0.871404	1	2	0
402131	1	0	0	2	29.4	5	27	2.14	0.63	4.1	4.3	5.5	20	55	101.667	0.826181	1	4	0
411640	0	2	2	1	24.1	9	50	2.83	2.21	4.9	5.9	6.5	19	65	163.667	0.876923	1	8	1
400247	1	0	0	1	35	5	75	2.94	1.23	4.8	5.1	5.2	16	48	131.667	0.895791	1	5	0
402588	0	2	1	1	18.9	7	64	2.21	1.18	5	5.6	5.3	40	65	122.333	0.8721	1	1	0
400779	0	2	1	1	16	6	47	2.28	0.53	4.6	6.6	4.9	19	64	132.333	0.79928	1	2	0
400570	0	1	0	2	21.9	8	41	2.59	0.7	4.1	4.5	4.5	13	79	99	0.79397	1	3	0
402808	1	0	0	1	27.5	4	48	2.25	1.03	4.4	5.8	5.6	11	60	99.3333	0.858961	1	1	0
400713	1	0	0	2	27.7	3	25	2.82	0.59	4.2	5	5	10	49	106.333	0.768146	1	7	0
405057	0	1	0	1	24.9	11	68	2.29	0.92	4.2	4.8	4.9	20	55	124.333	0.884211	1	9	0
408026	1	0	0	1	37.4	9	66	3.43	2.39	5.8	5.8	6.4	36	61	132	0.938775	1	6	1
401785	1	0	0	4	38.3	10	72	2.49	0.82	4.4	4.9	5.7	9	65	165	0.849202	1	3	1
407198	1	0	0	1	32.2	8	49	2.2	0.92	5	5.8	5.9	15	73	117.333	0.811881	1	7	0
408610	1	0	0	1	33	7	38	2.3	0.94	4.5	5.6	4.8	11	61	97	0.855073	1	5	0
406215	0	0	0	1	24.2	14	53	2.02	3.24	4.1	5.4	5.8	23	88	163.667	0.94	3	5	1
407466	0	1	0	1	22.1	11	51	3.03	0.49	5	5.24	5.9	41.95	54.92	121	0.825688	1	3	0
410198	0	0	0	1	32	16	80	3.45	1.57	5.5	11.2	7.2	12	81	108	0.9341	2	6	1
408314	1	0	0	1	41.2	21	67	3.79	3.31	6.9	4.9	5.7	15	74	127.667	1.02381	3	6	1
409996	0	2	1	4	22.7	10	72	2.71	0.9	5.5	4.24	6.1	17.09	70.07	130.667	0.850187	1	4	1
407693	1	0	0	1	45.8	22	78	3.65	1.66	6.8	5.2	5.7	21	58	162.667	0.941176	3	4	1
403126	1	0	0	3	42.5	20	60	2.57	2.05	4.9	5.2	5.8	28	51	137	0.89807	1	4	1
407251	0	0	0	1	28.7	23	70	3.26	1.83	5.2	5.8	6.4	33	88	120.667	0.961165	1	2	1
405050	1	0	0	1	26.1	3	29	2.14	0.62	4.1	4.5	4.8	16	54	99.3333	0.877778	1	0	0
407200	1	0	0	1	34	6	73	2.37	0.74	4.6	5.4	6.1	10	69	155	0.816326	1	8	1
404770	1	0	0	1	30.2	5	53	2.57	1.17	5.1	5	5.4	33	62	108.333	0.802198	1	4	0
404747	0	0	0	1	22.5	11	69	2.49	0.47	4.4	5.1	5.7	33	87	104	0.838384	2	5	0
411316	1	0	0	2	27.3	6	47	2.12	1.45	4.6	4.88	5.8	17.56	61.09	115.667	0.770751	1	2	0
405911	1	0	0	1	31.3	6	46	2.57	0.89	4.7	4.8	5.6	14	73	98.3333	0.871921	1	1	0
405263	0	1	0	3	21.6	9	32	2.07	1.06	3.9	5.6	4.8	34	87	131	0.877551	1	3	0
410681	1	0	0	1	34.5	9	50	2.55	1.43	5	4.9	5.6	4	54	104.667	0.821518	1	6	0
408414	0	0	0	1	14.8	7	45	2.63	1.33	5	5.37	4.9	25.35	78.52	110.667	0.835165	1	1	0
401547	0	0	1	1	18.4	6	50	2.3	1.06	4.3	4.8	5.2	21	69	126.667	0.885927	1	1	0
403074	0	0	0	1	21.7	9	73	3.09	1.06	5.1	5.3	5.4	9	68	122.667	0.878714	1	0	0
401127	1	0	0	2	27.2	4	33	2.88	0.34	4.1	5.3	5	16	69	108.667	0.812306	1	3	0
407153	0	0	0	1	19.9	9	63	2.67	1.07	4.6	5	5.5	20	62	136.333	0.818182	3	2	0
403768	0	0	0	1	17.9	10	58	1.83	0.89	3.7	5.9	4.8	14	65	108	0.83	1	4	0
400280	1	0	0	2	23.5	2	28	1.78	1.62	3.6	4.8	4.9	23	59	107.667	0.864865	1	6	0
407460	0	0	0	1	27	12	72	1.95	0.79	4	5.37	6.2	21.8	59.67	129.333	0.866667	1	4	0
401173	1	0	0	2	23.7	3	26	1.52	1.38	3.7	5.2	5.3	10	59	120	0.798334	1	1	0
401764	0	0	2	2	24.5	10	31	2.1	0.79	3.9	4.8	4.6	120	81	104.333	0.885063	1	4	0
410944	0	2	2	3	27.2	15	58	3.34	0.84	5.3	6	6.1	27	63	124	0.893388	3	7	1
400207	0	2	2	1	35.8	25	68	2.82	1.1	4.6	5	5	33	78	136	0.929493	1	1	1
408017	0	2	0	1	25.1	11	66	1.22	0.9	3.1	6.5	7.4	25	117	106.667	0.793814	3	2	1
408224	0	0	0	1	33.4	20	78	1.95	1.42	4.2	4.8	5.9	45	91	132	0.93	1	2	0
409765	1	0	0	2	36.7	10	68	2.59	1.91	5	4.9	5.2	15	75	141.667	1.03906	3	9	1
400302	0	2	0	1	27.5	12	62	3.26	1.06	5.1	5.4	4.9	18	60	146.333	0.928833	1	1	1
411745	1	0	0	1	36.4	10	52	2.27	0.92	3.9	5.5	5.6	20	55	103.333	0.899252	1	1	0
401133	1	0	0	1	36.4	6	60	2.84	1.72	3.8	5.5	5.3	72	45	156	0.889853	3	2	1
404584	0	1	0	1	30.1	18	31	2.49	1.06	4.5	5.2	4.5	22	64	119.333	1.0087	1	3	0
404521	1	0	0	4	33.1	6	24	3.16	1.09	4.9	5.2	5	13	66	109	0.76	2	4	0
401806	0	1	1	1	17.1	7	58	1.81	0.76	3.7	5.3	4.9	15	59	99.6667	0.801256	1	3	0
411204	1	1	0	1	27.1	4	55	2.72	0.68	4.5	5.1	6.1	13	61	112.333	0.808936	1	6	0
406908	1	0	0	1	35	9	52	2.68	1.1	4.6	5	5.9	23	44	110	0.896907	1	4	0
400194	0	2	0	1	29.7	8	77	2.91	0.42	4.8	5.9	5.2	10	49	134.333	0.892308	1	0	1
401757	1	0	0	1	26.9	3	67	3.31	1.01	5.5	5.5	5.6	8	61	159	0.857917	1	9	1
410724	0	2	1	1	21.3	10	68	1.91	0.79	5	5.1	5.7	12	63	122	0.845884	1	6	1
407034	1	0	0	1	40	14	68	2.63	2.47	4.6	5.7	5.1	33	63	143.667	1.07368	3	2	1
402126	1	0	0	1	35.7	9	63	2.72	3.01	5.7	4.6	5.7	12	128	120.333	0.937875	1	8	1
406359	0	1	0	1	32.1	20	62	2.18	1.35	4	8	7.8	20	54	137.667	0.995327	1	1	1
406033	0	0	0	1	22.6	12	79	2.93	1.17	4.7	5.5	5.2	15	74	124.333	0.909091	2	2	0
408491	0	0	0	1	28	16	60	1.35	1.26	3	6.7	6.4	41	76	133.333	0.953566	1	1	1
402331	0	1	1	5	29.3	9	77	3.14	0.86	5.6	5.2	4.4	14	83	148	0.908829	2	9	1
403283	0	0	0	1	27.1	15	66	2	1.57	3.7	5.7	5.7	21	78	132.667	0.89781	1	2	1
409866	1	0	0	1	33.9	9	60	2.38	0.93	4.6	4.67	6	15.93	112.62	132	0.847159	3	1	1
405018	0	2	0	1	25.9	7	66	1.45	0.73	3.3	7.3	6.3	32	65	122	0.844444	1	2	1
406239	1	0	0	1	29	5	54	2.04	0.6	4	5.4	4.9	15	60	114	0.824176	1	3	0
410226	0	0	1	1	22.4	12	48	2.13	1.22	3.9	5.7	5.5	51	72	133.667	0.8796	1	2	0
410695	1	0	0	2	33.9	10	44	1.71	0.49	3.4	4.7	5.5	7	52	101.667	0.994161	1	3	0
407050	0	0	0	1	16.5	6	19	0.45	0.31	2.3	5.9	5.5	8	76	110	0.846154	1	0	0
411461	0	0	1	3	25.6	16	65	2.71	0.94	4.8	5.2	5.6	12	69	124.333	0.961973	1	2	0
409567	1	0	0	1	26.6	4	52	2.39	0.73	4.8	4.6	5.4	6	44	119.333	0.783423	1	1	0
405405	0	1	1	1	19.6	6	59	2.02	0.54	4	4.4	4.7	13	75	104.667	0.808511	1	5	0
406934	0	1	0	2	13.7	5	20	2.34	1.09	4.5	6.3	5.2	8	109	118.667	0.816092	1	4	0
407458	0	1	1	1	14.4	3	51	2.04	0.57	3.9	5.25	6.1	33.89	67.08	129.667	0.666667	1	5	0
403463	1	0	0	2	26.1	3	34	2.25	0.61	4.1	5	5.7	28	59	93	0.779435	2	2	0
411669	1	0	0	1	37.5	13	66	3.92	3.63	6.6	6	6.6	22	51	123.667	1.00591	1	5	1
402042	1	0	0	1	33.7	7	52	2.35	1.1	4.3	5.5	4.5	23	44	129	0.856775	2	6	0
408477	0	0	0	1	17.4	8	54	1.53	1.2	3.7	5.07	5.1	14.72	63.7	121.667	0.860898	1	2	0
401353	1	0	0	2	30.2	6	67	3.64	0.92	4.9	5.4	6	13	54	145.667	0.939514	1	8	1
407104	1	0	0	1	37.8	14	60	2.9	0.7	4.8	5.1	5.8	14	68	117.333	0.96	1	1	1
403514	0	0	1	2	20.7	9	31	2.38	1.5	3.9	5.5	4.5	22	55	130.667	0.836735	2	2	0
400717	1	0	0	3	29.2	5	45	3.15	1.66	4.4	4.9	4.8	7	49	126.333	0.818454	1	6	0
407780	1	0	0	1	38.3	11	62	2.6	1.91	4.7	5.9	6.2	32	66	142	0.87	1	7	1
405132	1	0	0	1	35.4	8	72	2.14	1.21	4.6	5.8	5.2	11	66	145	0.835979	1	4	1
401003	1	0	0	2	40.7	15	59	3.06	2.4	5.4	7.9	6.6	28	69	145.667	1.00604	1	6	1
409939	1	0	0	1	34.4	7	75	2.63	1.4	4.8	5.6	6.2	15	58	125	1.01659	1	0	0
401432	0	0	0	1	25.4	11	62	4.84	1.86	6.1	5.8	5.2	16	87	116	0.920611	1	8	1
407864	0	1	1	1	28.4	10	57	2.57	1.27	4.5	5.3	5.6	17	80	143.333	0.923913	1	6	1
411802	0	0	2	1	21.9	10	44	2.76	0.71	4.5	5.3	5.3	13	64	112.333	0.86	1	2	0
407427	0	2	1	1	26.2	12	58	2.43	0.74	4.3	5.4	5.4	9	71	130.667	0.864078	2	3	0
411549	1	0	0	1	29.4	7	45	2.08	1.01	4	4.5	5.3	20	58	110.333	0.849949	1	2	0
405042	1	0	0	1	35.8	11	53	1.98	1.16	4.3	4.8	5.2	8	50	131.333	0.865385	1	6	0
401392	0	2	0	4	25.9	9	72	3.88	1	5.2	8.3	7.1	11	72	120.333	0.915274	3	5	1
404638	0	0	0	1	26	14	45	2.72	0.85	4.5	5.4	4.8	24	76	107.667	0.881188	1	3	0
404218	0	1	0	2	26.7	12	59	3.61	2.48	4.9	7.4	5.8	35	63	145.667	0.90625	1	4	1
403843	0	2	2	1	17.1	4	53	2.08	1.37	4.1	5.6	5.5	13	91	111.333	0.789474	1	1	0
401361	1	0	0	2	37.8	10	61	4.52	2.85	6.2	6.2	6.4	13	54	142	0.951494	1	3	1
401218	1	0	0	4	29.5	5	44	2.83	1.56	4.2	5.9	5.4	13	52	108	0.82997	1	2	0
405377	0	0	1	1	25.7	12	60	1.68	0.76	3.5	5.5	5.3	21	81	118.333	0.938144	3	2	1
402503	0	1	1	1	21.3	11	30	2.37	0.57	4.5	4.9	5.9	13	65	125.333	0.924084	1	3	0
410574	1	0	0	2	31.6	6	59	2.38	1.47	4.6	4.5	5.9	10	51	96.6667	0.789589	1	2	0
409945	0	1	0	1	23.1	7	75	3.28	1.32	5.8	6.13	7.5	14	144.68	131.333	0.975045	3	6	1
404556	1	0	0	3	34.7	7	29	2.53	1.68	4.7	4.8	4.9	14	54	105.333	0.813725	1	2	0
407270	0	0	0	1	21.9	12	63	2.57	0.87	4.9	5	5.7	18	66	108.667	0.85	1	2	0
411694	1	0	0	2	37.8	11	64	3.26	2.2	6.1	5.1	6.4	23	63	117.333	0.83001	1	8	1
407167	0	2	1	1	13.7	5	52	1.81	0.82	3.7	5	5.6	17	74	118.333	0.821429	1	7	0
409553	1	0	0	1	24.3	4	48	2.76	1.13	4.8	5.8	4.9	11	56	110.667	0.732539	1	1	0
400541	1	0	0	1	29.4	4	27	2.74	0.65	5.1	5.2	4.9	10	49	101.667	0.915669	1	2	0
407730	1	0	0	1	34.8	8	37	2.35	1.34	4.6	5.5	5.1	24	53	108.333	0.836735	1	3	0
406763	0	2	1	2	14.9	3	28	2.31	0.74	4	4.9	5.4	11	79	96.6667	0.71134	1	4	0
407533	1	0	0	1	24.5	2	27	2.31	1.05	4.5	4.99	5.8	8.25	58.03	101.333	0.833333	1	4	0
401613	0	1	0	2	14	4	28	2.4	0.72	4.7	4.7	5.1	15	90	112	0.826112	1	2	0
409639	0	1	1	1	21.2	12	47	2.92	1.57	4.9	5.2	5.6	30	68	109	0.964183	1	2	0
407808	1	0	0	1	27.3	4	46	2.28	0.82	4.6	5.8	5.4	8	59	117.333	0.795699	1	3	0
403509	1	0	0	1	28.8	3	51	2.48	0.44	5	4.9	5.1	22	50	121	0.764045	1	4	0
404873	0	1	0	5	28.7	14	55	3.41	6.9	7.1	8.2	7.7	22	52	117	0.93	1	4	1
403792	1	0	0	1	23.5	2	23	2.56	0.68	4.4	4.9	5	9	56	104.667	0.680851	1	0	0
408057	1	0	0	1	19.8	1	31	1.37	0.44	3	5.1	5.8	20	51	99	0.722222	1	4	0
403106	1	0	0	3	42	12	63	3.67	1.54	5.9	5.9	7.6	42	51	117.333	1.08536	1	9	1
407360	0	0	0	1	23.6	11	45	2.48	0.93	4.5	4.46	5.7	14.4	72.37	131.667	0.918367	1	12	0
410746	0	1	1	1	19.1	11	72	2.06	0.8	3.8	4.7	6	18	60	113.667	0.940299	1	10	0
403778	1	0	0	1	28	2	25	2.15	0.36	4.5	4.9	4.9	10	47	99	0.829546	2	3	0
404210	1	0	0	1	33.4	6	56	3.12	1.38	4.9	5.6	5.1	19	48	132	0.869565	1	3	0
402469	1	0	0	1	33.8	8	64	2.5	6.04	5.9	6.7	7.6	14	75	139.667	0.856991	3	4	1
411554	1	0	0	1	34.3	10	55	2.16	3.27	4	5.3	5.7	21	60	126.667	0.918041	1	9	1
404461	1	0	0	1	33.7	9	49	2.94	0.97	4.3	4.6	5.1	15	52	133.333	0.846939	1	0	0
411717	0	0	0	2	28.4	19	70	2.27	2.45	4.2	4.9	6.1	19	100	123	0.969964	3	8	1
402155	1	0	0	2	34.5	12	54	2.97	1.41	5.5	5.6	5.5	17	58	116.667	0.805089	3	4	1
410088	1	0	0	1	41.1	13	67	5.48	2.21	9.3	4.4	5.5	17	66	194.333	1.10392	2	11	1
410769	1	0	0	4	35.5	13	54	2.34	1.31	4.4	4.7	5.9	17	60	109.667	0.968091	1	2	0
410694	1	0	0	3	35.8	10	54	2.51	0.82	4.6	5.2	5.8	18	55	119.333	0.933957	2	3	0
408450	1	0	0	1	35.2	7	70	2.76	1.87	5.2	6.09	6	15.37	49.23	124	0.913044	1	4	1
407025	1	0	0	2	45.3	23	59	3.69	1.15	6.7	9.2	7.6	48	45	127.333	1.1068	1	6	1
410551	0	1	0	1	21.2	10	58	2.94	0.86	5.1	5.1	6.3	13	66	108.667	0.853057	1	3	0
400032	0	0	1	1	19.6	10	72	3.03	0.71	5	5.8	4.4	13	69	132	0.913295	1	2	0
410109	1	0	0	1	36.3	7	64	1.9	1.23	3.6	5.2	5.7	11	57	128.333	0.862493	1	3	0
405969	1	0	0	3	26.8	4	29	2.73	0.91	4.8	4.7	5.1	12	51	114.333	0.819149	1	3	0
408250	1	0	0	1	40.3	14	67	3.23	1.51	5.1	5.2	6.1	44	65	130	1.00481	3	12	1
409733	1	0	0	3	33.2	10	35	1.62	0.68	3.3	5.2	5.6	9	53	116.667	0.840752	1	1	0
401798	1	0	0	1	34.1	7	49	1.72	1.04	3.7	5.6	4.9	18	52	149.667	0.909823	1	3	1
402161	0	0	0	1	25.2	12	73	2.77	0.73	5.1	5.2	5	30	77	147	0.891451	2	4	1
411325	0	0	0	1	27	12	71	2.39	1.2	4.7	4.93	5.7	27.17	69.4	125	0.854958	1	1	0
400161	1	0	0	1	37.4	10	73	4.78	2.77	9	6.1	5.6	14	52	195.333	0.86639	3	2	1
400290	0	0	0	1	23.7	5	72	3.85	1.49	6	5.8	5.3	19	78	130.333	0.967585	1	2	1
401433	1	0	0	1	30.7	5	59	2.27	1.56	3.5	5.3	5.5	21	63	117.667	0.889949	2	1	1
403831	1	0	0	4	24.9	4	28	2.72	1.25	4.3	4.9	5.2	12	65	111.667	0.77	1	6	0
407254	0	1	0	2	14.1	6	57	2.79	1.66	5	5.3	5.9	11	70	131	0.817204	1	0	0
400627	0	0	0	1	17.2	5	63	2.21	0.59	4.2	5.1	5.3	11	55	125.667	0.835544	1	3	0
410677	0	2	1	1	28.8	15	68	2.87	0.96	4.9	5	5.8	19	75	118.667	0.962781	1	2	0
404167	0	0	0	1	30.3	18	70	5.22	2.78	6.5	6.6	5.8	30	80	135	0.953271	2	2	1
407509	1	0	0	1	36.2	9	54	2.98	1.02	5.6	4.6	5.8	12	50	144.333	0.895833	2	7	1
410645	0	0	0	1	24.3	7	75	2.91	0.7	5	4.8	5.5	27	59	105.333	0.905114	1	3	0
403480	1	0	0	1	39.6	16	64	3.25	1.5	5.7	5.1	5.9	15	46	113.667	0.818873	2	5	1
407011	1	0	1	1	35.7	10	52	3	3.23	6.1	5.2	5.3	13	65	99.3333	0.979167	1	2	1
400345	1	0	0	2	29.1	3	24	2.8	0.72	5	4.9	4.9	10	65	107.333	0.788013	1	4	0
407105	0	0	0	1	27	9	60	1.48	0.38	3.9	5.8	6.4	22	64	116.333	0.946237	1	1	0
411464	0	1	1	4	7.5	1	34	2.29	1.42	4.6	4.64	5.4	34.29	61.28	118.667	0.721232	1	6	0
402182	1	0	0	1	29	4	61	2.73	1.3	5.1	4.9	5.6	8.28	62.05	114.667	0.88985	1	1	0
410673	1	0	0	1	24.6	3	55	2.79	0.6	4.8	4.9	5.8	16	44	126.333	0.806681	1	3	0
400964	0	0	0	1	27.5	9	65	3.18	1.19	5.2	6	5.5	26	65	145	0.98484	1	3	1
401435	0	2	1	1	23.9	7	75	2.68	0.64	4.1	5.3	5.1	41	68	123	0.792356	1	1	0
401117	1	0	0	2	33.9	7	39	3.3	0.86	4.4	5.6	4.5	26	41	103	0.740308	1	3	0
403984	0	0	1	3	16.7	6	33	1.77	0.37	3.1	5	4.9	30	60	107.333	0.785714	1	2	0
406430	0	1	0	4	22	8	33	2.78	1.22	4.9	5	5.3	20	70	105	0.92	1	7	0
406574	0	1	0	1	25.1	13	72	2.44	0.86	4.3	5.35	5.7	8.95	70.78	129.333	0.934783	1	6	0
404324	0	0	0	3	16.5	5	28	3.11	0.52	4.9	4.4	5.1	43	72	125.333	0.850575	1	2	0
401682	0	1	0	3	24.6	10	24	2.61	1.56	5	5.7	5.1	38	93	117	0.910756	1	3	0
403631	1	0	0	4	36	10	38	2.09	0.75	4.2	5.1	5	16	56	111	0.785714	1	5	0
406518	0	1	1	2	20.3	5	41	2.13	1.26	4.8	5.88	5.2	16.07	72.7	111.333	0.768421	1	3	0
409785	1	0	0	1	37	7	74	1.53	0.81	3.7	5.5	5.5	7	47	114.333	1.10085	1	2	1
402989	1	0	0	2	32.1	8	38	2.39	0.86	4.3	5.1	5	11	73	120.333	0.861826	1	5	0
410620	1	0	0	1	21	1	56	2.24	1.19	4.1	4.8	5.9	18.14	39.91	130.333	0.736574	1	8	0
408246	1	0	0	2	31.4	5	49	1.8	1.19	4	5.3	6.2	41	54	96.6667	0.801136	1	3	0
403693	0	1	0	1	30.1	17	50	2.89	0.91	4.4	5.1	4.8	20	71	126.333	0.962617	1	2	1
402735	1	0	0	4	32.6	3	40	2.8	1.22	5	6.9	5.1	9	42	97.6667	0.780577	1	4	0
406224	1	0	0	4	27.5	2	32	2.18	0.99	4.5	4.5	5.4	22	47	98.6667	0.747126	1	0	0
403970	0	1	0	4	13.3	6	49	2.83	1.11	4.5	4.6	5.1	22	69	112.667	0.824176	1	10	0
407675	1	0	0	1	39.8	4	44	1.93	0.79	4.4	4.1	4.9	14	52	130	0.775956	1	1	0
407048	0	1	0	4	11.2	4	21	1.65	1.26	3.5	4.4	5.4	22	67	106	0.818182	1	7	0
406293	0	2	1	3	20.6	8	35	2.51	1.52	4.7	5.9	5.2	13	62	109	0.921875	1	5	0
411342	0	0	0	1	22.7	10	65	2.08	0.91	4.1	4.6	6.3	27	84	127.333	0.957555	3	2	1
405253	1	0	0	1	38.2	17	60	2.48	0.83	4.8	4.9	5.2	26	74	137.667	0.950495	1	4	1
408151	1	0	0	2	35.8	12	58	2.88	2.37	5.9	5.2	5.5	9	63	144.667	0.855769	1	12	1
404719	0	0	0	1	33.1	20	66	2.54	0.7	4.6	6.5	5.4	21	70	138	1.14583	1	1	0
408585	0	2	2	4	29.2	16	65	1.99	1.43	3.9	7.4	7.5	22	63	132.667	0.986563	1	3	1
408562	1	0	0	1	38.9	14	71	3.12	1.54	5.7	5.4	5.6	15	45	166	1.04108	1	2	1
405213	1	0	0	1	37.3	9	69	3.18	2.12	5.3	6.5	6.4	18	51	136.667	0.958763	1	4	1
407654	1	0	0	1	36.3	10	63	2.72	1.82	5.2	5.7	5.9	23	58	164.333	0.865979	1	3	1
401384	1	0	0	1	35.5	11	48	3.35	1.15	4.3	5.1	5.7	20	50	121.667	0.815318	1	2	0
410423	0	1	0	1	25.6	12	62	2.72	1.28	4.9	5.5	5.9	22	64	116.667	0.912327	1	5	0
409678	1	0	0	2	43.2	13	66	3.35	1.64	5.8	5.9	6.1	23	54	148.667	0.918409	3	6	1
400010	0	2	2	1	34.3	18	74	3.91	1.79	6	5.9	5.7	9	75	122.667	1.0202	1	3	1
407069	1	0	0	1	38.5	14	64	3.07	3.52	6.2	8.7	7.5	17	47	174.667	0.881188	1	2	1
410394	1	0	0	1	39.2	14	66	4.5	2.25	7.3	7.3	7.4	32	75	159.667	0.989136	3	1	1
404630	1	0	0	1	29.5	5	44	1.88	0.93	4.2	5.1	4.8	14	60	134	0.784946	1	2	0
410130	1	0	0	3	33.5	6	51	2.75	1.15	5.1	5.2	5.7	12	48	181	0.938114	1	5	1
403034	1	0	0	1	29.2	6	48	2.85	1.01	4.8	5.41	3.8	13.04	56.85	123.333	0.944986	1	1	0
403220	1	0	0	1	39.2	13	75	4.1	4.37	7.4	11.8	9.9	31	88	141.333	0.844747	3	7	1
408471	1	0	0	1	37.6	11	57	3.5	1.59	5.8	5.7	6	14	59	114.667	0.786046	1	4	1
400398	0	1	0	3	25.1	12	22	2.9	1.33	4.5	5.1	5.1	21	67	109.333	0.908019	1	2	0
407931	0	0	0	1	30.7	23	66	3.1	1.28	4.9	6.5	5.7	35	84	120	0.929825	1	8	1
406808	1	0	0	2	35.3	11	47	2.39	1.64	4.5	4.5	5.3	26	54	119	0.949495	2	2	0
405359	1	0	0	1	40.4	12	77	3.08	1.48	5.3	6	5.9	17	61	137.667	1.02151	1	7	1
402553	1	0	0	1	37.8	10	68	2.24	0.86	5.6	6.6	7	74	58	153.667	0.918412	1	3	1
411010	1	0	0	1	31.1	5	49	2.74	1.55	4.9	5.5	5.9	25	62	122	0.925349	1	3	0
409884	1	0	0	1	36.4	10	69	3.38	2.2	5.7	11.89	8.4	28.65	89.08	152.667	0.992826	1	10	1
410234	0	2	2	1	29.4	14	72	1.95	3.41	4.3	8.9	9.2	24	83	113.667	0.916966	3	2	1
406141	0	0	1	1	23	15	48	2.76	0.59	4.9	5.3	5.2	13	64	112.667	0.865385	1	0	0
401828	0	0	2	3	23.8	19	71	2.03	0.88	3.8	7.4	5.9	86	58	159.667	1.01572	3	2	1
405240	1	0	0	1	40.3	9	69	3.49	3.08	6.1	5.3	5.4	22	69	149.333	0.978261	1	1	1
411275	0	1	2	1	26.4	12	76	2.71	1.29	5.1	4.7	5.1	15.59	68.4	144.333	0.982012	1	4	1
406280	1	0	0	1	35.3	8	53	2.61	0.63	5.1	5.9	5.9	18	57	131	0.929293	1	5	0
406744	1	0	0	1	42.8	21	72	3.39	0.72	5.4	5.3	5.8	21	52	110.667	1.07	3	7	1
408355	1	0	0	1	34.2	8	57	3.78	1.26	6.3	4.8	6.1	21	45	107.667	0.989362	1	2	1
410221	1	0	0	1	33.7	6	62	3.83	1.98	6.6	6.3	6	26	86	134.333	0.837564	3	5	1
401358	1	0	0	3	32.3	9	46	3.18	0.86	4.4	5.1	6	15	61	104	0.814624	1	2	0
408473	1	0	0	1	35.8	8	53	2.94	0.95	4.9	5	5.3	24	64	100	0.844194	1	2	0
400056	1	0	0	3	32.5	6	26	2.51	1.04	4	4.5	4.5	10	50	118	0.901961	1	3	0
405373	0	2	1	2	22	9	46	2.08	0.59	4.5	5.1	5.3	13	66	114.333	0.846939	1	1	0
410071	0	0	1	3	23.1	7	44	2.55	1.6	4.7	5.4	6.1	62	52	119.333	0.964504	1	2	0
404411	1	0	0	2	34.4	8	49	3.2	1.36	5	4.2	4.9	14	59	135	0.87	1	2	0
401131	1	0	0	3	28.3	5	36	2.77	0.86	4.3	5.4	4.6	15	48	103.667	0.765881	1	4	0
403142	1	0	0	4	28.9	4	51	2.28	0.96	4.4	7.1	6.2	16	60	148.333	0.871145	1	7	1
405260	0	0	1	1	22.9	11	46	2.19	0.72	4.4	5.5	4.8	16	62	123	0.87	1	3	0
402625	1	0	0	2	31.1	6	28	1.84	0.5	4.6	5.3	5.2	11	49	111.667	0.863988	1	1	0
411095	0	1	1	1	19.8	11	41	2.19	1.14	4.1	5.3	5.5	24	80	115.667	0.857368	1	0	0
404409	0	0	0	1	11.8	4	21	3.2	0.65	4.2	5	5	24	66	120.333	0.741935	1	1	0
405787	1	0	0	1	34.9	8	47	2.5	0.98	4.5	5.2	4.9	15	64	91.6667	0.8	1	2	0
404564	1	0	0	4	26.9	4	28	2.28	0.93	4.6	4.6	5	14	66	101	0.693069	1	1	0
400475	0	1	1	1	22.9	8	50	2.97	1.47	5.1	5.1	5.3	21	65	114.333	0.871118	1	8	0
406148	0	0	0	1	17	7	30	2.8	0.74	4.9	5.2	5.7	18.28	71.74	110.333	0.769231	1	3	0
404127	1	0	0	1	30.8	7	46	3.04	0.43	4.8	5.2	5.3	18	50	121.667	0.87234	1	3	0
400429	1	0	0	1	25.3	4	32	2.5	0.88	4.2	4.7	4.8	19	51	104	0.754071	1	3	0
407776	0	0	0	4	23.8	11	35	2.13	1.33	4	5.9	5.9	22	78	121	0.898936	1	3	0
401397	0	2	0	1	31.5	15	74	3.69	0.93	4.5	5.2	5.6	13	103	152	0.922129	1	3	1
407095	0	2	2	1	21.5	11	46	2.69	2.99	4.8	4.6	6	25	73	136	0.865979	1	14	1
407059	0	1	1	1	18.7	8	40	2.68	0.94	4.5	4.9	5.4	25	65	114	0.887755	1	2	0
404178	1	0	0	2	21.8	2	18	1.64	0.57	3.7	4.7	4.9	12	71	104.333	0.688172	1	3	0
403841	1	0	0	2	21.7	2	24	2.7	0.58	4.7	4.9	4.5	11	48	105.333	0.766667	1	4	0
401153	1	0	1	2	30.5	5	40	3.33	0.77	4.6	5.3	4.6	9	57	111.667	0.821226	1	3	0
411497	0	1	1	1	21.3	7	62	3	0.71	5.1	4.6	5.7	18	60	97.3333	0.840407	1	2	0
403833	1	0	0	2	30.2	4	31	1.81	0.4	4.4	4.8	4.8	18	47	96	0.755102	2	4	0
408412	0	2	2	1	33.2	20	66	2.09	1.77	4.2	5.53	5.9	25.81	141.01	96.6667	1	3	5	1
408325	1	0	0	1	42	14	71	2.46	1.96	4.5	9	8.5	15	55	140.333	0.867924	3	7	1
407930	1	0	0	1	38	13	39	2.29	0.84	4.3	4.9	5.5	15	45	134.667	0.893805	1	0	0
410622	1	0	0	1	30	6	45	1.74	0.52	4	5.24	5.8	11.95	57.79	122	0.784419	1	3	0
402300	0	0	0	1	24.4	10	66	2.53	1.12	4.5	5.3	4.5	16	72	111.333	0.846112	1	1	0
404191	0	1	0	2	28.8	16	62	4.6	2.3	5.8	6.9	5.7	35	66	118	1.01031	3	4	1
401468	0	1	1	1	19.9	9	54	1.65	1	3.2	5.6	4.8	89	78	114.333	0.831033	1	3	1
410863	1	0	0	1	42	19	73	3.17	2.02	6.2	4.9	5.5	28	52	127.333	0.979981	1	9	1
404078	1	0	0	1	30.9	6	36	3.02	0.7	4	4.6	5.3	10	51	115.333	0.803922	1	2	0
402351	1	0	0	1	36.3	10	48	2.37	1.27	4.7	4.9	6.1	21	43	123.667	0.867855	1	2	0
411563	1	0	0	1	38.4	13	65	1.94	1.1	4	5.5	5.8	14.1	54.48	106.333	0.939183	2	2	1
411689	1	0	0	1	38.9	10	69	3.29	3.11	6.1	4.9	6.3	16	67	140.667	0.882562	1	6	1
401035	1	0	0	3	38.5	13	49	2.09	0.85	4	5.3	5	11	51	125.333	0.889043	1	1	0
400478	0	1	0	1	26.1	16	47	2.68	1.3	4.2	4.6	4.7	25	71	122.667	0.9543	1	1	0
407495	0	0	0	1	22.5	10	31	2.5	1.16	4.5	4.94	5.7	12.15	67.35	121	0.901961	1	0	0
408600	1	0	0	4	30.3	7	47	0.97	0.52	3.3	6.9	5.3	13	52	102.667	0.805007	1	3	0
400313	0	0	1	1	31.7	21	67	3.31	1.07	5.2	11.8	8.4	15	64	144.667	1.0591	1	5	1
407802	0	2	2	1	21.1	12	57	1.75	1.06	4	5.6	5.9	46	92	134	0.792079	3	2	1
400132	1	0	0	2	36.8	10	62	3.64	1.08	5.6	6.3	5.3	14	34	159	0.892948	3	2	1
410982	1	0	0	2	29.5	5	46	2.49	1.05	4.6	5.3	5.4	17	51	107	0.756757	2	5	0
400406	1	0	0	2	29.8	5	64	3.84	1.3	5.9	5.9	5.5	14	49	144	0.849741	1	4	1
402481	0	1	0	2	17.1	8	53	2.6	0.89	4.5	5.4	5.8	17	64	106.333	0.867213	1	2	1
404659	1	0	0	2	35.1	11	43	1.36	0.94	3.3	4.6	4.9	13	61	127.333	0.865385	1	3	0
407072	1	0	0	3	37.5	10	66	2.98	0.85	4.8	5.4	5.4	11	40	180.333	0.989474	1	3	1
400858	0	1	2	1	28	13	60	4.87	2.12	6	6	5.6	23	69	170	0.927026	1	3	1
405245	0	2	2	1	28.7	17	59	1.45	0.67	2.9	5.7	5.6	34	69	137.667	0.911765	2	5	1
401694	1	0	0	1	35.4	11	63	2.22	1.97	4.3	5.2	5	30	62	126	0.931748	3	5	1
401585	1	0	0	2	31.1	5	44	2.11	1.29	4.6	5.1	5.2	16	47	119.333	0.774842	1	1	0
411478	1	0	0	4	40.8	20	61	2.19	2.17	3.8	5.2	6.3	18	51	143	0.990022	1	1	1
408167	0	1	1	1	23	11	56	2.67	1	4.8	6.2	6.1	15	68	135.333	0.938775	1	2	0
403935	1	0	0	1	42.3	18	76	2.22	0.7	3.8	4.2	4.7	26	59	132.667	0.943925	3	0	1
402881	1	0	0	1	33.3	9	38	1.88	1.01	3.8	5.4	5	23	54	118.333	0.823615	1	1	0
401448	0	1	2	1	28.8	9	78	2.82	0.74	4.3	5.5	5.6	16	83	107	0.934922	1	2	0
402708	1	0	0	1	28.2	2	64	3.63	0.79	6.1	5.5	5.5	22.34	49.04	165.667	0.789263	1	1	1
411043	1	0	0	1	31.1	6	37	2.56	0.97	4.3	4.6	5.1	23	55	119.667	0.822466	2	5	0
411178	1	0	0	3	36.7	10	54	2.19	1.33	4	5.2	5.6	13	55	101	0.873524	1	11	0
406500	1	0	0	1	24.8	3	30	1.63	0.5	3.5	4.9	5.2	8	62	108.333	0.734043	1	3	0
410330	1	0	0	2	31.7	6	54	2.72	1.1	4.8	4.9	5.7	10	54	133.667	0.877241	1	3	0
405399	1	0	0	1	39.8	12	54	1.87	0.8	3.8	5.8	5.2	44	79	134.333	0.940594	1	3	1
400322	1	0	0	1	30.3	5	47	2.31	1.08	4.5	5.7	4.5	14	57	112	0.814992	1	3	0
406924	0	1	0	1	24.6	15	63	2	0.61	4.2	5.9	5.8	15	69	132.333	0.91579	2	3	0
403511	1	0	0	2	34.9	6	31	2.53	0.68	4	4.7	4.5	9	52	116.667	0.78744	1	5	0
403566	1	0	0	1	34.6	9	54	2.28	1.54	4.5	5.1	5.3	17	54	128	0.816326	2	4	0
403423	1	0	0	2	30.1	5	32	2.41	1.01	4.5	5.45	5.3	10.46	62.63	114.667	0.822233	1	3	0
409735	0	0	2	3	13.1	6	43	2.7	0.47	4.9	4.8	5.9	19	74	118.333	0.817534	1	5	0
400958	0	1	0	1	8	8	63	2.69	0.98	5	5.4	5.6	15	71	129	0.802233	1	2	0
402164	0	0	2	1	21.4	11	51	1.67	0.86	3.7	5.1	5.8	29	81	138	0.879132	1	1	1
409699	1	0	0	1	34.2	8	54	2.61	1.34	4.8	5.3	5.9	13	60	103.333	0.835202	1	2	0
406297	0	1	1	3	22.6	10	45	2.67	0.69	4.9	5.8	5.3	16	78	120	0.936842	1	6	0
404942	1	0	0	3	27.6	3	27	2.04	1.01	4.8	4.6	4.9	17	55	102.667	0.747368	1	5	0
408030	1	0	0	1	29.3	5	40	1.79	0.67	4	5.2	6.1	6	61	111	0.765306	1	3	0
404136	0	1	1	1	24.2	14	50	3.9	0.98	5	5	5.3	22	65	125.333	0.918367	1	2	1
400589	0	0	1	1	16.2	7	44	2.73	0.93	4.4	4.2	4.9	27	68	116.333	0.810327	1	5	0
411605	1	0	0	1	30.1	5	59	2.98	1.22	5.1	4.58	5.6	16.84	50.07	105.333	0.894796	1	2	0
401113	1	0	0	1	32.6	6	31	3.26	1.24	4.8	5.4	4.8	11	49	106.333	0.79657	1	9	0
408100	1	0	0	3	28.9	5	46	2.5	0.45	4.6	5.4	5.7	13	47	117.667	0.870466	1	2	0
405022	0	0	0	3	22.3	9	45	2.18	0.84	4	5.4	5	14	84	102.667	0.852632	1	2	0
402243	0	1	1	1	15.6	5	54	2.01	0.7	4.1	4.91	5.4	14.78	65.17	108	0.832853	1	3	0
406475	1	0	0	3	29.8	6	41	2.33	1.2	4.6	5.7	5.2	7	53	108.667	0.764706	1	3	0
411642	1	0	0	1	31.4	4	75	2.55	0.82	4.9	4.4	5.9	12	54	130.667	0.822753	1	5	1
410475	1	0	0	2	31.5	8	46	2.74	0.78	5	5	6.1	12	47	104	0.835051	1	2	0
400190	0	1	0	1	16.7	6	63	2.65	0.96	5	5.7	5.2	20	68	132.333	0.793195	1	2	0
411633	0	0	1	3	27.6	12	44	2.36	1.17	4	5.89	5.4	23.17	67.5	117	0.951133	1	3	0
405201	0	0	0	2	18.7	3	28	2.08	0.64	4	4.7	5.2	13	88	112	0.75	1	2	0
405227	1	0	0	1	30.6	5	43	1.97	0.73	4.1	5.8	5.3	26	66	124.667	0.815217	1	5	0
403353	1	0	0	1	30.7	4	69	3.23	0.87	5.7	5.6	5.4	17	54	121	0.78757	1	4	1
402513	0	1	1	1	20.8	9	46	2.51	1.45	4.9	5	5.1	15	67	113.667	0.84962	1	4	1
401783	1	0	0	1	26.6	2	22	2.03	0.48	4	5.4	4.5	11	54	101.333	0.803956	1	3	0
410025	1	0	0	2	25.7	3	25	2.04	0.53	4.3	4.48	5.6	7.66	54.27	113.667	0.747315	1	3	0
402542	0	1	1	1	16.7	5	62	2.45	1.41	4.6	4.8	5.7	24	87	123	0.841533	1	1	0
402106	1	0	0	2	24.4	3	29	2.18	0.43	4.1	4.9	5.2	18	58	100.667	0.873606	1	2	0
410239	1	0	0	1	37.5	10	53	1.84	1.2	4.1	5.4	5.6	30	69	107.333	0.865432	3	9	1
409825	1	0	0	1	36.5	8	54	3.12	1.52	5.4	4.1	5.9	20	78	105.667	0.971703	3	5	1
406267	0	0	0	1	32.9	20	54	3.19	2.83	5.7	5.1	5.6	37	84	123	1.1	1	8	1
404071	0	0	0	1	33	26	65	2.77	2.06	3.6	7.7	8	43	80	161.667	1.03636	1	2	1
406614	1	0	0	4	35.5	11	57	2.78	1.38	5	5.39	5.5	18.53	66.81	150	0.902913	1	5	1
403786	1	0	0	1	36.3	7	77	2.84	1.89	5.7	4.7	5.3	16	58	119	0.914894	2	2	1
408286	0	0	0	1	28.4	9	64	2.49	1.28	4.6	4.3	5.5	34	85	111.333	0.855556	1	1	0
407704	1	0	0	1	43.4	23	67	3.75	1.23	6.4	4.3	6	33	59	149	0.893443	1	8	1
407928	1	0	0	1	28.8	5	50	1.98	0.83	4	5.4	6.1	12	55	123	0.757895	1	2	0
408303	0	0	0	1	33.1	26	68	3.16	2.78	5.4	6.2	8.8	17	95	145.667	1.03465	1	2	1
410205	0	0	0	1	35.4	29	65	3.39	1.54	5.4	5.5	6.4	14	73	158.333	1.00887	1	2	1
402372	1	0	0	1	34.6	6	54	1.89	0.9	3.8	3.9	6.1	8	58	114.667	0.848561	3	1	0
407745	1	0	0	1	40.8	11	61	2.79	1.94	5.7	4.6	6.2	36	43	152.667	0.911765	1	4	1
404682	0	1	1	1	28.7	17	61	2.34	0.74	4.3	6.5	5.3	21	63	134	0.970874	1	2	0
405439	1	0	0	1	32.8	6	36	2.91	1.34	5.2	4.5	4.9	9	61	108.667	0.808081	1	1	1
411102	1	0	0	2	34	10	32	1.89	0.95	3.4	5.4	5.9	38	49	111	0.898704	1	4	1
402687	1	0	0	1	36	13	44	4.11	2.49	6.8	5.9	6	17	51	131.333	0.947218	1	6	1
404068	0	1	1	4	30.2	24	54	3.49	2.57	4.8	5.8	4.9	29	77	128.667	1.00962	1	3	1
403759	0	0	1	1	22.8	4	19	2.27	0.63	4	5.2	4.8	19	61	118.333	0.716346	1	3	0
409625	0	1	1	1	21.3	6	52	2.19	0.69	4.4	5.4	5.7	21	73	118.667	0.929619	1	5	0
410591	1	0	0	1	30	6	64	3.46	0.89	5.8	5	6.1	15	46	148.333	0.87246	2	10	1
401498	0	1	1	2	27.1	11	70	4.84	1.18	5.9	5.2	5	27	91	130.667	0.887603	3	2	1
410009	0	1	0	1	24.2	12	69	2.1	1.62	5	4.7	7.2	29	53	142.333	0.96949	2	5	1
403959	1	0	0	2	21.6	2	26	2.28	0.5	4.3	5.1	4.4	15	64	111	0.744681	1	3	0
411103	1	0	0	3	31.3	5	43	2.88	1.35	5	4.6	5.4	10	59	108.333	0.839793	1	2	0
402397	1	0	0	1	31.9	6	67	2.35	0.91	4.8	4.8	6.1	18	61	119.333	0.876757	2	7	0
402954	0	1	1	5	23.7	6	39	2.52	0.84	4.4	4.97	5	28.85	78.8	111.333	0.870699	1	1	0
404931	1	0	0	1	30.4	6	28	2.01	0.51	3.8	5.2	4.5	17	49	108	0.757576	1	3	0
402457	1	0	0	1	32.5	6	40	2.28	0.83	4.4	4.9	5.6	14	55	115.333	0.783324	1	2	0
402594	0	1	2	1	28.4	16	69	2.99	1.53	5.3	8.2	7.8	16	112	142.333	0.946158	3	4	1
400272	1	0	0	4	35.2	8	62	2.69	1.05	4.5	7.7	5.7	17	45	160	0.804251	1	7	1
402260	1	0	0	1	37.4	12	42	1.38	1.15	3.7	4.8	4.6	85	52	106	0.961558	1	0	0
404492	1	0	0	1	36.3	11	46	2.83	0.79	3.7	5.6	5.1	12	59	117	0.819048	1	2	0
403175	1	0	0	2	32.1	8	46	2.4	1.1	4.6	5.2	5.4	26	51	107.667	0.8205	1	2	0
406847	1	0	0	3	26.7	4	29	2.56	0.52	4.4	5.3	5.5	23	66	107.333	0.78125	1	4	0
410527	0	2	2	1	28.6	9	80	3.11	1.11	5	5.3	5.8	16	99	148	0.871726	3	2	1
404692	1	0	0	1	32.8	6	28	2.1	0.75	4.2	5.4	4.9	16	66	102.333	0.855556	1	5	0
411465	1	0	0	1	25.7	4	34	2.82	1.16	5.1	4.84	4.5	10.66	54.65	120	0.783527	1	4	0
408267	1	0	0	1	35.5	9	57	2.44	0.87	4.5	5.3	5.8	43	47	112.667	0.93	1	1	0
411649	1	0	0	1	37.3	10	52	2.48	1.23	4.5	4.6	5.9	26	49	120.333	0.909091	1	1	0
406860	1	0	0	3	38.8	15	67	2.31	1.34	4.4	5.2	5.9	11	60	149	1.07778	3	1	1
403731	0	1	1	1	26.2	13	61	2.53	0.92	4.3	5.1	5.1	15	61	106.667	0.927835	1	10	0
402019	1	0	0	2	29.4	6	35	1.71	0.72	3.6	5.2	5.3	18	49	112.333	0.802625	1	2	0
402784	0	1	1	4	30.7	13	44	4.86	2.9	8.4	17.3	10.1	168	63	112.667	0.994767	1	3	1
403990	0	1	1	2	12.1	3	27	3.26	0.94	5.1	6.4	4.4	29	59	111	0.808989	1	5	0
411028	1	0	0	1	31.6	4	62	1.98	0.71	3.7	4.5	5.7	36	52	132.667	0.829007	1	1	0
410607	0	1	1	1	22.1	9	63	2.89	0.53	5	5	6.1	10	66	120.667	0.903088	1	3	0
408342	0	1	0	1	23.4	9	60	2.99	1.55	5.1	4.8	6	32	76	107	0.884211	1	10	0
411038	1	0	0	3	32.9	8	55	2.65	1.04	5.1	5.5	6.1	41	76	108	0.86488	1	2	0
405647	1	0	0	2	25.5	3	23	2.03	0.98	3.9	4.59	5.1	39.36	66.47	100	0.773196	1	3	0
403905	0	1	1	1	22	10	31	3.13	0.87	4.9	5.3	5	23	75	120	0.836538	1	4	0
400467	1	0	0	1	32.4	5	54	2.78	0.87	4.9	5.2	4.9	15	46	120.667	0.791984	1	7	0
400502	0	1	1	1	19.8	5	57	2.38	0.81	4.3	4.9	5.3	21	63	120.333	0.783869	3	4	0
402544	0	1	1	1	15	5	27	2.52	1.25	4.7	5.1	5.5	25	76	114.333	0.904631	1	7	0
400200	1	0	0	1	25.4	3	38	2.2	0.74	4.8	5	4.9	44	43	110.333	0.865342	1	3	0
410332	1	0	0	3	31	7	43	2.66	1.51	4.7	5.5	5.6	14	34	134.667	0.89214	1	5	0
402658	0	1	1	1	25.6	9	70	2.69	0.82	4.8	5.97	5.4	14.95	72.04	121.333	0.896349	1	1	0
405714	0	1	0	3	10	3	41	1.77	0.66	3.5	5.2	5.4	18	79	120	0.789157	1	5	0
405717	1	0	0	3	23.9	3	29	2.41	0.74	5.1	4.8	5.1	15	62	104	0.857143	1	4	0
408225	0	0	0	3	21.2	12	43	1.88	1.06	4.2	4.9	4.4	25	105	108.333	0.83871	1	4	0
403355	1	0	0	1	29.7	5	46	1.75	1.22	4.6	4.8	5.3	11	50	98	0.701173	1	0	0
405262	1	0	0	1	29.8	4	30	1.95	0.7	4.3	5.8	5.2	34	59	104	0.755102	1	3	0
405983	1	0	0	2	32.4	6	42	2.45	1.25	4.5	4.9	5.2	9	54	100.333	0.841584	1	2	0
407333	1	0	0	1	27	3	28	2.02	0.57	4.1	5.31	6	14.2	48.42	93.6667	0.822222	1	0	0
403192	1	0	0	1	31.5	7	43	2.26	0.81	4.2	4.6	5.4	26	56	98	0.792292	1	6	0
402685	0	1	1	1	21.9	14	44	2.2	0.66	3.9	6.6	5.4	25	61	136	0.88166	1	1	0
407168	1	0	0	1	21.8	2	52	1.97	0.53	4.4	4.9	5.4	12	53	115.667	0.744444	1	0	0
405740	0	0	0	1	19.1	8	60	1.67	0.7	3.7	5.8	5.3	13	64	113	0.808081	1	2	0
409575	0	0	1	2	21.9	6	33	2.71	1.54	5	5.8	5.4	14	74	118	0.892086	1	2	0
403812	1	0	0	2	27.1	4	27	2.08	0.52	3.8	4.5	4.5	16	64	105	0.8	1	1	0
408228	1	0	0	2	27.3	5	43	2.31	0.96	4.5	4.8	6	34	46	112.667	0.768421	1	1	0
400228	1	0	0	2	33.9	7	70	2.85	0.85	4.9	5.8	5.3	11	62	126.333	0.797736	1	9	0
410807	1	0	0	1	29	4	66	1.54	0.81	3.9	4.6	5.5	19	46	110.333	0.761067	1	1	0
409651	0	0	1	3	23	8	42	2.63	1.29	4.9	5.3	5.9	31	63	127.667	0.907312	1	6	0
409756	0	1	1	3	5.7	3	26	2.04	0.83	3.8	4.3	5.5	18	66	110.333	0.828732	1	2	0
407237	0	2	2	1	27.7	19	57	2.61	2.01	4.7	4.2	6.3	15	92	115	1.06061	1	2	1
403846	1	0	0	2	17.7	2	27	1.31	0.54	3.2	4.9	4.4	9	51	101.333	0.875	1	3	0
410066	0	2	1	2	21.2	3	69	2.22	0.92	4.9	5.6	5.9	16	68	112.667	0.771879	3	3	1
407371	0	0	0	1	19.5	6	57	2.21	0.73	4.3	5.2	5.5	19	57	118	0.844086	1	9	0
405601	1	0	0	1	27.1	4	29	2.26	0.68	4.2	5.2	4.6	33	61	92.6667	0.808081	1	3	0
400867	1	0	0	4	25.9	3	31	3.05	1.44	4.7	5.6	4.9	15	47	106.667	0.935904	2	1	0
403346	1	0	0	1	37.3	8	66	2.53	2.92	5.2	5.07	5.9	14.87	58.9	120	0.93545	1	6	1
400088	1	0	0	4	38.8	13	62	2.88	4.02	6.1	6.1	5.6	16	41	155.667	0.896161	1	3	1
405921	0	1	1	1	30.4	14	59	2.42	1.35	5	4.9	6	27	78	128.667	0.903061	1	1	0
410367	0	2	2	2	25.7	12	61	3.37	1.99	5.5	5.6	5.9	19	62	143.667	0.906396	3	3	1
402936	0	0	1	1	52.9	6	74	2.55	0.65	4.9	5.27	5.6	12.21	71.17	131	0.846022	1	2	0
410712	1	0	0	1	31.2	5	65	2.92	0.8	4.8	4.4	5.7	43	60	112.667	1.00793	1	3	0
406815	0	0	0	1	30.8	17	71	2.36	1.43	4.3	6	5.3	15	97	150	0.959596	3	4	1
405780	1	0	0	1	36.7	12	65	2.61	2	4.7	7.2	6.1	17	50	129.333	0.958763	1	6	1
404772	0	0	0	2	35.1	21	82	2.02	1.24	3.8	7.2	7.6	13	98	143.667	0.990196	2	3	1
409998	1	0	0	4	27.6	5	39	2.29	1.12	4.2	4.94	5.9	9.9	42.22	122.667	0.786143	1	7	0
411562	1	0	0	1	40.3	16	50	2.56	1.21	4.7	5.2	5.9	11	60	138	0.871901	1	3	0
401875	1	0	0	1	42.1	18	66	3.96	1.18	6.3	5.6	5.2	19	39	129.333	0.870816	1	9	1
401679	1	0	0	1	37	9	50	2.36	0.79	4.2	5.1	4.5	94	43	120	0.827217	1	2	1
403069	1	0	0	1	36.9	12	52	3.6	1.87	6.1	4.8	5.7	17	72	119	0.984787	1	8	1
401606	1	0	0	1	28.8	4	58	1.95	1.06	4	5.5	5.1	10	51	97.6667	0.807255	1	2	0
406289	0	0	1	3	29	18	33	2.52	1.1	4.3	5.9	5.5	23	82	121.333	0.944954	1	2	0
411277	0	1	1	1	18.7	7	62	2.46	0.83	4.6	4.69	5.1	24.42	79.39	125	0.849839	1	5	0
404959	1	0	0	1	37.8	11	69	2.02	1.52	3.8	7	6.2	14	53	147.667	0.967033	1	5	1
404293	1	0	0	1	40.9	13	55	3.53	1.49	5	6	6	38	39	163.667	0.927273	1	7	1
404629	0	1	1	1	21	9	30	2.7	1.32	4.7	5.2	4.9	16	69	117.667	0.845361	1	2	0
405352	1	0	0	1	40.1	13	70	2.95	1.29	5.1	4.9	5	12	53	105.333	1.02062	1	6	0
405020	1	0	0	1	28	6	40	2.52	0.79	4.7	5	5.2	20	64	108	0.78	1	0	0
410606	1	0	0	1	29.6	6	43	2.68	0.54	4.7	5.4	6	7	64	118.333	0.80031	1	5	0
406427	0	0	0	3	27.2	11	65	2.58	1.18	4.7	6.4	5.7	26	75	132.333	0.977273	1	1	0
411530	0	2	0	1	26.3	18	61	2.22	0.78	4.3	5.3	5.8	23	60	123.667	0.92477	1	5	0
410046	1	0	0	1	31.9	6	65	2.1	0.59	4.6	5.6	6.1	20	49	125.667	0.826432	1	3	0
407647	1	0	0	1	41.2	9	55	3.78	1.19	7.8	6.3	6.6	13	52	137.667	0.770833	1	9	1
407209	1	0	0	1	33.6	9	59	4.34	2.53	7.5	10.7	8.6	19	56	136.667	0.836538	2	6	1
401684	0	1	2	1	24.2	17	68	1.75	9.53	6.4	8.2	6.6	24	66	132.333	1.00981	1	4	1
411108	0	2	0	1	27.1	11	66	2.58	1.03	4.8	5.7	6.2	18	74	110	0.848533	1	1	0
406352	1	0	0	1	32.7	5	49	2.32	1.46	4.7	4.9	5.4	47	41	112.333	0.849462	1	2	0
404754	1	0	0	1	35.5	7	61	3.13	1.5	5.8	4.7	5.4	16	58	119	0.956522	1	1	1
401017	1	0	0	1	38.3	9	66	3.96	0.95	6.6	5.6	5.4	26	62	160	0.872679	3	7	1
406268	1	0	0	1	31.1	7	51	2.22	0.82	4.4	4.9	5.5	15	59	132	0.793814	1	1	0
403087	0	1	0	5	30.3	11	70	3.13	1.7	5.1	4.2	6.2	9	62	121.333	0.964328	2	5	1
410104	1	0	0	1	30.5	7	43	2.6	1.19	4.7	5.1	6	8	47	120	0.94029	1	3	0
404014	0	0	0	3	30.2	22	57	2.27	3.68	4	6.3	5.7	30	79	137.667	0.971154	2	3	1
404911	1	0	0	3	34.9	10	40	2.76	1.34	5	5	5.2	21	56	107.333	0.961538	1	3	0
402710	1	0	0	2	37.5	12	60	2.27	1.32	4.7	6.4	5.6	16	62	116.667	0.888498	1	2	1
403449	1	0	0	2	35.6	10	67	3.02	1.65	5.5	7.7	6.4	15	56	120.333	0.892006	1	2	1
404593	0	0	0	3	33.4	16	41	2.62	0.61	4.2	5.6	4.9	29	64	112.333	0.981482	1	4	0
404277	1	0	0	1	34.9	7	49	3.22	0.95	4.5	4.9	4.7	16	50	120.333	0.84	1	2	0
401134	1	0	0	1	30.1	5	63	2.92	0.79	4.8	4.8	4.2	23	65	116.333	0.811625	1	7	0
404740	1	0	0	1	30.9	7	54	2.51	0.94	5.3	5.2	5	16	61	126.667	0.785714	1	4	1
407499	1	0	0	3	38.1	12	56	2.82	2.21	4.9	6.12	6.6	7.56	48.99	150	0.951219	1	1	1
403155	1	0	0	1	40	9	77	2.83	1.11	5	5.6	5.3	9	68	141.333	0.931943	1	15	1
408517	0	1	1	1	17.5	7	54	2.22	0.72	4.8	4.8	5.6	14	63	103	0.862178	1	3	0
402919	1	0	0	2	37.7	12	55	2.48	1.12	5	7.01	6.6	14.47	48	128.667	0.85423	1	4	1
411627	0	1	1	1	25.3	11	58	1.87	1.3	3.6	5.26	5.2	21.76	74.23	132.333	0.84127	1	3	1
406092	0	2	1	1	26.5	11	74	2.93	0.71	5.6	5	5.4	28	94	160.333	0.84375	2	4	1
402306	1	0	0	2	32.1	5	32	2.65	1.56	5	5.4	4.2	20	51	100	0.848967	1	4	0
410852	1	0	0	1	34.9	4	65	2.41	1.14	5.2	4.3	5.5	7	68	126	0.773038	1	3	1
409863	1	0	0	1	33	6	64	2.37	0.69	4.6	5.16	5.7	15.21	46.39	100.333	0.898248	1	4	0
401763	0	1	1	1	25.1	13	53	2.51	1.29	4.2	7.9	7.1	7	56	114.333	0.956637	2	1	1
405224	1	0	0	1	30.9	6	42	1.7	0.93	3.5	4.8	4.6	14	58	111	0.79798	1	2	0
403046	0	0	2	3	25.6	12	72	2.16	1.5	4.2	6	4.9	21	66	153	0.916621	1	5	1
403344	1	0	0	1	33.5	6	45	2.74	1.52	5.1	4.5	5	11	62	109.667	0.852738	1	0	0
408546	0	1	2	1	22.8	12	61	2.21	1.32	4.1	5	5.4	133	80	147	0.901047	2	4	1
405858	1	0	0	3	27.3	4	37	2.7	1.09	4.7	5.1	4.9	13	74	91	0.765306	1	2	0
400340	1	0	0	2	25.1	2	29	2.38	1	4.6	4.4	4.4	14	58	117.667	0.802703	1	2	0
400333	0	2	0	1	25.1	7	76	0.06	0.9	3.4	4.7	6.4	11	75	173.667	0.797361	3	2	1
405083	1	0	0	1	31.7	6	41	2.77	0.94	4.9	5.8	5.1	13	65	121	0.808081	1	1	0
403955	1	0	0	1	30.1	7	44	2.64	1.1	4.2	5.3	4.9	16	43	102	0.823529	1	5	0
407385	0	1	1	1	23.9	13	52	1.97	0.73	4	5.7	6	22.31	66.01	110	0.858586	1	2	0
402576	1	0	0	3	25.2	3	53	2.32	0.62	4.7	5.88	5.8	19.35	55	118	0.747417	1	4	0
407506	1	0	0	1	40.8	10	73	3.46	1.18	5.7	5.71	5.9	25.87	43.08	164.333	0.953846	1	5	1
403676	1	0	0	5	40.3	7	80	3	1.05	4.6	4.8	5.3	11	53	117.667	1.00524	1	6	0
403438	1	0	0	1	39.9	14	69	5.69	1.39	9	5.6	5.4	13	63	155	1.03357	2	4	1
407634	1	0	0	1	27.1	6	30	1.42	1.6	4.5	5.4	5.9	10	54	114	0.808511	1	6	0
403875	1	0	0	1	29.3	4	34	2.52	0.85	4.4	4.9	4.7	16	60	99	0.734694	1	2	0
409750	1	0	0	1	28.3	5	48	2.2	0.72	4	4.6	5.4	8	50	127	0.837781	1	4	0
403765	1	0	0	3	26.3	4	42	2.14	0.38	4.2	6	4.9	14	43	120	0.791209	1	3	0
407429	1	0	0	2	24.2	4	50	2.12	1.12	4.1	5.63	5.7	12.88	51.6	116	0.818182	1	1	0
403593	0	1	1	4	22.8	11	42	2.91	1.17	4.4	6.8	5.8	14	75	125.333	0.85	1	4	0
402779	1	0	0	3	30.9	4	37	2.61	0.92	4.7	5.8	4.9	15	63	107.333	0.805103	1	2	0
404280	0	1	1	2	17.1	7	44	2.7	0.96	4.8	5.1	4.9	33	57	114.667	0.810526	1	1	0
406749	0	1	1	5	24.5	12	45	2.71	1.51	5	5	5	23	73	129.667	0.92	1	1	0
405549	1	0	0	1	33.3	7	69	2.39	1.05	4.3	5.3	5.6	14	46	111.333	0.847826	1	3	0
408093	1	0	0	5	25.1	3	44	2.24	0.49	3.8	4.6	5.3	4	61	104.333	0.727273	1	4	0
404006	0	1	1	3	20.8	9	48	2.26	0.77	3.8	5.1	5	18	64	122.667	0.794118	1	4	0
402366	1	0	1	4	31	5	33	2.11	1.02	4.2	4.6	5.5	15	60	112.333	0.80444	1	6	0
405805	0	0	0	1	22.5	10	25	2.13	1.19	4.1	4.7	5	19	100	111	0.758929	1	2	0
402029	1	0	0	1	29.2	5	56	2.74	0.56	4.7	5.2	5.6	12	60	110	0.763934	1	6	0
400353	1	0	0	1	25.8	2	59	2.46	0.93	5.1	4.3	4.7	10	52	117.667	0.821429	1	2	0
409653	0	2	0	2	22.5	9	55	2.27	0.91	4.2	5.5	5.5	97	85	107.333	0.909874	1	2	0
401702	1	0	0	1	21.9	2	28	1.99	0.79	3.8	5.4	5.2	28	56	121.667	0.802289	1	1	0
406263	0	0	0	1	16.1	3	20	2.01	1.12	4	5.1	5.3	20	80	119	0.752688	1	1	0
410969	1	0	0	1	26	3	51	2.29	1.15	4.7	4.7	5.5	15	53	111.667	0.794638	2	2	0
405069	1	0	0	4	22.6	3	28	2.4	0.64	4.6	4.8	5	10	73	110.333	0.72165	1	1	0
411691	0	1	1	1	26.6	14	54	2.46	0.68	4	7.9	9.1	70	56	120.333	0.915957	1	7	1
401335	1	0	0	1	35.7	9	54	2.91	7.23	7	5.7	6.3	19	63	128.667	0.896837	1	3	1
400293	0	2	2	4	27.5	14	66	2.42	1.07	4.1	7.4	7	44	63	136.333	0.930348	1	3	1
406646	1	0	1	2	36.4	11	49	3.9	2.24	6.6	6	5.7	22	50	119	1.02041	2	9	1
410462	1	0	0	3	33.5	7	68	3.03	1.23	5.4	4.7	6.1	7	61	139	0.935912	2	5	1
408014	1	0	0	1	36	12	53	2.38	1.67	4.4	5.2	6.1	27	53	121.667	0.852941	3	4	0
404821	0	2	1	1	33.7	29	67	2.56	1.07	4.4	6	5.3	51	77	146.667	0.941667	3	5	1
410344	1	0	0	1	33.1	7	74	1.91	0.7	4.3	5.5	6.1	10	67	129.333	0.844576	1	5	0
410942	1	0	0	3	34.4	10	54	2.57	1.33	4.4	4.9	5.6	16	57	134.667	0.898865	1	2	1
406757	0	0	0	3	23.1	8	35	2.75	0.85	4.7	5.6	5.5	30	66	104	0.955056	1	1	0
401619	0	1	0	1	31.7	26	71	1.88	5.3	4.5	5.5	5.4	20	87	179.333	1.08209	1	2	1
400967	1	0	0	1	36.4	11	46	2.23	0.78	5.1	5.7	5.3	11	48	117	0.823976	2	2	1
403861	1	0	0	2	30.7	6	50	1.59	1.11	4.3	4.4	5	16	56	116.667	0.80198	1	5	0
410839	1	0	0	1	30.9	8	45	2.26	1.12	4.6	4.82	5.5	14.05	53.97	103.333	0.860478	1	13	0
403900	0	1	1	1	31.2	9	67	3	1.02	4.9	6	5.6	23	70	127	0.787879	3	3	1
411821	1	0	0	1	35.4	9	61	1.55	1.17	3.5	6.1	6	24	56	118.333	0.868087	1	2	1
409519	0	1	1	3	25.4	11	31	2.94	7.68	6.8	5.1	5.9	13	88	136.667	0.914204	1	5	1
402923	1	0	0	1	38.9	8	66	4.24	2.8	7.5	4.82	5.4	23.9	63.06	124.333	1.04018	1	5	1
404833	0	2	0	1	30.5	16	60	2.88	2.13	5.1	6.3	6.3	29	64	117.667	0.934579	1	2	1
404817	1	0	1	1	32.6	6	27	1.7	0.85	3.9	4.7	4.9	13	56	110	0.755102	1	2	0
402036	0	1	0	1	19.5	13	59	1.73	0.62	3.8	5.3	5.7	23	68	135.333	0.864474	2	1	0
409933	1	0	0	1	40.1	18	64	3.77	2.54	6.9	7.05	7.4	17.48	66.34	148.667	0.89859	3	8	1
407367	0	1	1	1	21.3	12	48	2.07	1.09	4.2	4.27	5.4	50.65	62.33	115.667	0.877551	1	2	0
402084	0	1	1	5	23.8	12	54	3.3	2.53	5.4	5.3	5.2	27	81	118.667	0.930639	1	5	1
401095	1	0	0	2	35.4	8	49	2.21	1.3	4.9	5.2	5.9	16	70	116.333	0.836058	1	3	1
403761	1	0	0	1	34	8	52	2.63	1.57	4.6	5.2	5.3	28	48	120.333	0.780952	1	5	0
407735	0	2	2	1	35.7	29	58	2.11	1.69	3.6	6	6.2	31	70	155.333	0.964602	1	2	1
400522	1	0	0	1	35.7	7	73	2.47	1.26	4.5	5	5.4	16	52	127.333	0.837867	3	4	0
405499	1	0	0	1	39	17	62	2.5	0.76	4.3	5.6	5.9	17	43	120.333	0.866973	2	2	0
400352	0	0	1	1	27.3	14	49	1.96	0.93	3.6	5.3	5	31	63	128	0.83731	1	4	0
403512	0	0	0	1	27.7	16	54	3.13	1.45	4.7	4.9	5	23	71	124.333	0.902913	2	1	0
402515	1	0	0	1	29.9	6	33	2.59	0.75	4.4	4.8	5.3	16	61	106.667	0.836898	1	5	0
411347	0	1	0	2	22.9	13	63	3.65	4.02	7	5.69	6	11.59	77.37	115.333	0.94002	2	1	1
400243	0	2	1	2	35.2	26	50	2.08	0.89	3.5	6.1	5.9	25	70	135	0.960681	1	7	1
405310	0	0	0	2	26.7	14	31	1.71	0.76	3.5	5.2	4.7	18	77	111.667	0.933962	1	4	0
410644	0	1	1	1	26.1	13	54	3.12	0.47	4.9	4.8	5.1	27	59	130.667	0.931514	1	2	0
409889	1	0	0	1	33.5	8	71	4.23	2.64	7.4	5.99	6.9	10.38	60.1	100.333	0.866034	1	1	1
406619	1	0	0	2	20.8	2	25	2.16	0.52	4.8	5.4	5.4	9	66	97.6667	0.695652	1	2	0
411609	0	2	2	1	21.6	8	55	2.45	1.3	4.1	4.8	5.3	32	84	106	0.832021	2	2	1
411017	1	0	0	2	31.1	4	53	1.97	0.75	3.8	6.9	6.4	94	40	123.667	0.831765	1	2	0
407615	0	2	2	1	31.4	17	70	2.19	2	3.8	5.8	6.1	14	99	129.667	0.933962	3	7	1
400546	1	0	0	1	26.8	5	31	2.35	0.58	4.1	4.8	4.8	21	55	101.667	0.798765	1	3	0
403432	1	0	0	1	34.6	7	71	1.6	7.78	6	5.2	5.7	24	88	122.667	1.26918	1	10	1
402380	1	0	0	2	34.6	10	59	2.25	1.08	4.5	4.9	6.1	17	69	126.333	0.919747	1	4	1
409593	1	0	0	1	34.3	6	72	2.53	1.58	4.7	5.3	5.4	13	70	126.333	0.887125	1	3	0
403088	1	0	0	5	35.1	7	64	2.94	1.4	5	4.1	5.4	12	49	129.333	0.93439	1	8	1
408312	0	0	0	1	19.7	8	47	2.15	0.98	4	5.2	5.9	19	72	114	0.835106	1	3	0
400400	1	0	0	1	29	5	75	2.55	0.65	5.1	4.9	5.3	17	49	142.333	0.903581	1	4	1
407588	1	0	0	1	34.6	6	63	2.73	1.68	4.9	9.1	7.1	10	51	173.333	0.835165	1	8	1
406284	0	1	1	4	24	12	49	1.97	0.92	3.9	5.7	5.6	42	60	134.333	0.9	1	3	1
405199	1	0	0	2	28.7	4	26	2.65	0.44	4.5	4.7	4.8	12	55	115	0.784946	1	3	0
403660	0	1	0	4	26.1	9	32	2.81	0.99	4.3	5	4.8	31	59	130	0.852941	1	6	0
403532	0	0	0	2	22.5	10	36	2.75	1.03	4.5	4.8	4.6	42	62	118.667	0.883495	1	4	1
411518	1	0	0	1	33.5	8	44	2.28	0.92	4.2	5.55	5.7	12	47.52	96.3333	0.837924	1	5	0
402761	1	0	0	1	42.7	9	55	2.46	1.54	4.7	4.93	5.2	31.49	50.75	109	0.869633	1	2	0
404566	1	0	0	1	31.6	5	63	5.06	3.36	6.8	7.6	7.7	22	48	131	0.824176	1	4	1
409703	1	0	0	2	35.1	9	51	2.15	1.8	4.1	5.6	5.7	10	51	158.333	0.862203	3	4	1
411735	1	0	0	4	32.1	6	42	2.9	0.82	4.8	4.9	5.6	12	53	103.333	0.782316	1	9	0
407767	0	1	1	1	28.5	16	53	2.77	1.24	5	5.7	5.8	24	60	111.667	0.90991	1	5	0
406748	1	0	0	2	27.6	6	44	2.04	0.62	4.3	5.4	5.1	8	57	106	0.821053	2	7	0
401786	0	0	0	4	21.2	8	71	1.34	0.88	2.7	5.3	4.9	14	72	136.333	0.872795	1	5	1
405066	1	0	0	2	24.6	3	28	2.65	0.64	4.9	4.8	5	9	58	101	0.729167	1	4	0
400792	1	0	0	1	29.6	6	34	2.85	0.71	3.8	6	5.1	15	47	124.333	0.860321	1	4	0
408235	0	2	1	1	29.7	19	53	2.18	2.33	3.9	5.2	5.7	40	98	113.667	1.04717	1	0	1
409595	1	0	0	1	33	7	48	2.58	0.83	4.4	4.8	6	11	43	98.3333	0.8594	1	3	0
405047	0	0	2	1	28.3	14	52	2.88	1.09	4.5	5.2	4.8	21	67	108	0.94	1	6	1
403754	0	0	0	2	9.2	4	41	1.85	0.63	3.4	4.9	4.6	11	78	105	0.782609	1	1	0
411094	1	0	0	1	27.6	3	31	2.21	0.72	4.4	5.2	5.4	12	55	109.333	0.735742	2	3	0
401389	1	0	0	1	29	4	55	3.41	1	5	5.2	5.1	15	65	123	0.798499	1	2	1
401191	1	0	0	1	30.7	6	42	2.75	1.28	3.9	5.9	5.5	16	48	111	0.832533	1	3	0
411226	0	0	1	1	15.3	7	50	2.51	1.49	4.5	4.6	5.1	19	55	132.333	0.846527	1	2	0
410813	0	1	2	4	17.9	7	62	1.71	0.72	3.5	5.2	6.1	8	60	103.667	0.842105	1	6	0
403804	0	1	0	1	22.4	3	63	2.15	0.9	3.5	4.6	5.1	11	66	135.333	0.842224	3	4	0
401953	1	0	0	2	24.6	4	49	2.17	1.11	4.3	4.6	5.1	12	61	107	1.04454	1	1	0
404890	0	2	1	4	27.9	13	60	1.58	1.44	3.4	5.5	5.1	34	67	112.333	0.94	1	6	1
404872	1	0	0	3	24.6	3	30	2.18	0.8	4.5	5.5	5.3	13	52	107.333	0.768421	1	2	0
407981	1	0	0	1	26.7	3	30	2.03	0.85	4	4.9	5.4	9	59	110	0.774193	1	1	0
401528	0	1	1	1	20.5	9	34	2.64	1.14	4.9	5.4	5	22	66	110.667	0.905356	1	6	0
406051	1	0	0	1	35.3	11	55	2.16	0.82	4.3	4.86	5.8	16.33	53.25	130	0.811321	1	3	0
403248	0	0	1	1	18.9	8	51	2.09	0.88	4.1	4.4	5	19	72	117	0.899041	1	0	0
411590	1	0	1	1	29.7	4	41	2.36	1.53	4.7	4.5	5.3	11.42	75.23	110	0.740783	1	2	0
401649	1	0	0	1	35	10	63	3.78	2.3	6.2	7.8	6.2	26	61	158.667	0.896913	1	7	1
401049	1	0	0	1	40.5	12	78	1.87	1.13	4.2	6.7	6	24	72	115.333	0.964033	1	6	1
402486	0	0	2	1	20.8	9	50	1.99	0.75	4.3	5.3	5.3	18	73	115	0.917183	2	2	0
403402	1	0	0	1	40.4	15	71	4.07	2.1	6.9	7.17	6.4	23.37	58	139.667	0.919362	3	5	1
400414	1	0	0	1	33.7	8	53	2.35	0.84	4.8	4.7	5	29	54	114.667	0.861111	2	3	1
400107	0	2	0	1	27.7	17	66	5.09	1.31	7.1	6.4	5.1	33	96	134	0.978994	3	4	1
403340	0	0	1	1	29.8	10	62	2.56	1.76	5.3	5.7	5.6	15	82	144	0.950848	1	5	1
402386	1	0	0	1	38.7	9	69	1.9	2.88	4.5	6.9	6.5	10	50	167	0.87678	1	7	1
406753	1	0	0	1	31.5	9	46	1.68	0.64	3.4	4.6	4.9	11	58	129.667	0.829787	1	2	0
410627	1	0	0	4	30.2	5	59	3.37	1.57	6	5	5.8	14	48	141	0.866667	1	5	1
403393	1	0	0	1	40.4	13	80	2.31	1.3	4.8	6.7	5.6	11	58	137	0.966275	1	10	0
403758	0	0	0	2	17.9	6	32	2.95	1.17	3.9	5.4	4.8	13	75	133	0.865979	1	3	0
404261	1	0	0	2	30.7	5	36	2.41	0.99	3.7	5.4	4.7	10	61	96.3333	0.752475	1	3	0
400368	1	0	0	1	39.2	7	82	2.76	0.85	4	4.7	4.9	15	67	161.333	0.917085	3	1	1
401977	1	0	0	1	34.2	8	64	3.58	3.72	6.3	5.3	5.1	16	52	135	0.859659	1	5	1
403834	1	0	0	2	32.3	8	51	2.48	0.96	4.4	5.3	4.7	11	44	120	0.979592	3	5	0
401288	1	0	0	2	39.2	13	74	5.37	1.13	7.1	5.3	6.1	15	69	147.667	0.864555	1	10	1
411425	0	0	0	1	16.3	8	38	2.12	1.06	4.3	4.37	5.1	16.65	64.27	111.667	0.818277	1	1	0
404898	1	0	0	2	26.6	4	28	2.09	0.62	4.3	5	5	14	55	99.6667	0.782609	1	7	0
402105	1	0	0	2	31.8	6	44	0.62	0.44	3	4.9	5.3	8	37	109.333	0.791203	1	3	0
409926	1	0	0	1	32.9	7	69	2.07	1.15	4.6	5.3	5.4	13.88	52.84	160.333	0.839908	1	2	1
402568	0	0	1	1	20.3	12	42	3.18	0.82	5.3	5.3	5.4	34	67	131.333	0.885254	1	1	1
410212	0	2	2	1	28.2	19	66	3.74	2.11	6.5	6.1	6.3	12	78	156.333	0.969773	1	1	1
404712	1	0	0	1	35.7	11	45	2.67	1.61	4.8	4.9	5.2	16	61	130.333	0.842593	1	1	0
409648	1	0	0	2	30.9	8	29	2.04	1.26	3.6	5.2	5.7	14	56	105	0.862307	1	2	1
401817	1	0	0	3	39.7	13	59	2.22	3.19	4.4	6.3	5.6	35	52	148.333	1.11045	1	4	1
410909	1	0	0	1	30.8	7	50	2.59	1.43	4.9	5.4	5.7	10	57	121	0.853581	1	1	0
410138	0	1	1	1	29.1	15	62	3.89	1	6.7	5	5.2	26	67	142.667	0.987836	3	1	1
401941	0	1	1	1	23.5	10	50	2.51	1.52	4.7	4.8	5.2	27	69	121.333	0.846635	1	2	0
400199	1	0	0	2	39.6	10	68	2.6	2.29	4.8	9.1	6.7	26	52	164.333	0.908341	1	4	1
404681	1	0	0	1	40.7	11	61	3.22	0.88	5.6	5.6	5.6	26	51	128.667	0.968421	1	2	1
406521	1	0	0	1	28.5	4	46	2.77	0.5	5	5.5	5.6	23	49	111.667	0.782609	1	2	0
400495	0	1	0	1	26.2	11	38	2.72	0.88	4.1	4.5	5.3	21	64	108	0.949541	1	5	0
407156	1	0	0	1	42.1	19	64	2.82	2.69	5.3	5.3	6.5	20	57	112	1.13265	3	2	1
405952	1	0	0	1	36.7	10	68	2.39	1.67	4.8	4.9	5.6	15	55	117.333	0.886139	1	4	1
408175	1	0	0	1	28.3	4	66	2.89	0.66	5	5.2	5.8	17	59	141.333	0.850575	1	3	1
402432	1	0	0	1	27.4	5	66	2.34	0.84	4.7	5.3	5.7	15	66	119.667	0.948038	2	7	1
405540	0	1	0	1	23.2	12	72	2.24	0.69	4.2	5.4	5.2	32	51	135	0.892473	1	1	0
404767	0	0	0	1	21.9	8	50	1.85	0.54	3.5	4.2	5.1	13	60	102	0.873684	1	1	0
401491	0	0	0	2	31.1	12	79	3.15	0.82	4.6	5.6	5.3	40	86	137	0.787768	1	10	0
403858	0	0	0	1	31.6	16	69	2.44	0.92	4.4	6.5	5.9	21	77	138.333	0.942857	2	7	1
403601	1	0	0	2	33	6	32	2.39	0.42	4.7	5	5	9	58	134.333	0.769231	1	2	0
407998	1	0	0	1	26.8	4	48	2.52	0.66	6	4.8	5.9	12	50	149	0.789474	1	3	1
405691	1	0	0	1	41.8	20	71	2.84	1.27	5.1	5	5.5	14	55	127.333	1.06731	2	1	1
403607	1	0	0	1	33.7	6	27	1.91	0.63	3.9	5	4.5	61	57	97.6667	0.897959	1	4	0
403453	1	0	0	4	30.4	7	49	2.08	0.91	4.7	5	5.1	10	55	112.333	0.755949	1	3	0
407007	1	0	0	1	36.9	12	61	2.99	2.34	5.4	11.2	8.4	13	64	134.333	0.88	2	5	1
411829	1	0	0	1	28.3	5	47	2.49	0.94	4.8	5.3	5.5	2	44	100.333	0.833783	1	1	0
403205	1	0	0	1	29.1	6	63	2.41	0.79	4.6	5.2	5.7	22	50	135.333	0.837246	1	1	0
402817	1	0	0	2	34.9	6	41	2.7	1.05	4.5	5	5.4	12	61	104	0.69395	1	4	0
403100	0	1	1	3	24.2	10	60	2.59	0.98	4.7	5.3	5.4	25	51	135.333	0.912253	1	2	0
407065	1	0	0	1	32.2	9	49	1.78	1.01	4.1	4.8	5.9	10	58	102.333	0.876289	1	6	0
406850	1	0	0	1	32.6	7	62	2.22	2.19	4.7	6	6	30	66	118	0.852459	1	7	1
401605	0	1	1	1	22.6	11	49	2.48	0.52	4.3	5	5.2	20	68	115.667	0.891892	1	6	0
407612	1	0	0	1	40.6	12	44	2.91	1.16	4.8	5.9	5.9	13	56	119	0.878788	1	4	0
408142	1	0	0	1	38.2	10	75	2.7	1.49	5.7	5.4	5.7	15	57	157	0.94382	2	5	1
402859	1	0	0	1	29.8	5	35	2.26	0.96	4.3	5.2	4.9	12	71	100.667	0.816244	1	2	0
400150	1	0	0	1	28.4	4	34	1.91	0.4	3.8	4.7	4.9	16	43	113.667	0.827715	1	5	0
404296	1	0	0	1	38.1	12	65	2.83	3.8	4.9	5.4	5.9	20	59	147.333	0.854369	1	3	1
411798	0	0	1	1	31.9	20	65	3.25	1.11	5.7	5.1	5.5	21	78	131.333	0.981913	1	2	1
407500	1	0	0	1	33.5	7	49	1.93	0.59	4.1	5.86	6.3	33.22	38.9	124	0.84375	2	0	0
400549	0	0	0	2	22.3	8	36	2.11	0.63	3.6	4.8	4.5	21	74	121	0.849779	1	1	0
411571	1	0	0	1	39.7	16	71	2.94	1.55	4.9	5.35	5.8	25.52	50.63	138.333	0.888535	1	5	0
406331	1	0	0	1	37.3	11	52	2.62	0.82	4.6	5.1	5.4	26	61	120	0.897959	2	2	0
402195	1	0	0	2	20.1	2	30	2.16	0.88	5.1	4.55	5.1	14.88	52.66	123.333	0.715499	1	2	0
409513	1	0	0	1	37.8	11	69	3.68	1.99	6.3	6.25	6.1	17.65	59.27	150.333	0.970026	1	3	1
400217	1	0	0	1	39.2	9	61	2.5	1.26	4.9	5.4	5.1	17	51	129	0.869481	2	5	0
400749	1	0	0	2	29.1	5	27	2.92	0.95	4	5.4	4.9	7	53	98.3333	0.823377	1	5	0
411416	1	0	0	1	33.4	5	71	4.2	2.45	7.7	5.27	5.5	13.26	54.87	144.667	0.796542	2	4	1
408541	0	1	1	1	18.8	8	53	2.72	1.09	5	4.9	5.4	20	60	121.667	0.809006	1	2	0
406537	1	0	1	1	26.6	4	39	2.48	0.48	4.6	4.32	5.1	20.19	55.96	104.333	0.784946	1	0	0
405124	1	0	0	1	21.5	3	32	1.85	0.52	3.4	4.5	5	10	61	108.667	0.698925	2	3	0
406607	0	1	0	1	25.2	10	64	2.05	0.64	4.1	5.73	5.7	18.64	59.55	139	0.924731	2	0	1
402753	1	0	0	1	34.4	7	53	2.4	1.56	4.5	6.2	5.5	45	46	104.333	0.822959	1	2	0
406404	1	0	0	1	31.5	8	51	2.55	1.2	4.6	6	4.9	14	51	106.333	0.841584	1	1	0
406754	0	1	1	4	21.9	10	28	2.73	1.14	4.7	5	5.3	16	79	126	0.851485	1	2	0
405416	1	0	0	2	33.8	7	32	2.2	0.75	4.8	5	4.9	19	49	117	0.817308	1	5	0
401122	0	2	1	3	15.4	4	39	2.86	0.52	4.1	5.8	5	20	68	118.667	0.836057	1	7	0
410166	0	1	2	1	29.6	14	72	3.91	1.34	6.9	5.9	5.5	16	82	140	0.923971	2	2	1
409991	0	2	2	1	29	15	65	1.65	1.32	3.4	6.91	5.9	15.34	56.91	143.333	0.927775	1	2	1
400621	1	0	0	2	26.5	5	38	2.21	0.4	4.2	5.1	4.7	12	52	111.667	0.81865	1	3	0
404478	0	0	0	2	20.9	12	54	2.6	1.81	3.6	5.2	5.1	82	68	132.333	0.89	1	1	1
405864	1	0	0	2	32.2	7	50	2.23	2.78	4.3	6	5.7	17	53	107.667	0.897959	1	7	1
406495	1	0	0	1	30.5	6	40	1.8	0.82	3.9	5.7	5.2	10	52	115	0.8	1	3	0
404008	1	0	0	4	27.8	4	50	3.26	0.39	4.7	4.8	4.8	16	56	114.667	0.736842	1	9	0
409701	1	0	0	3	26.9	3	65	2.38	0.6	5	4.5	5.9	15	62	125.333	0.770915	1	6	1
402623	1	0	0	1	26	4	49	2.19	0.79	4.9	5.1	5.3	16	61	125.333	0.774883	1	3	0
404395	0	1	1	1	23.5	10	38	2.49	0.95	4	5.6	4.8	24	74	125.333	0.84	1	2	0
409706	0	0	0	1	23.6	10	57	1.84	0.89	3.9	5.4	6	17	67	129.333	0.837353	3	7	1
404704	0	0	0	1	21.6	8	47	2.76	0.77	5.1	4.8	5.4	16	73	136.333	0.8	1	4	0
410871	1	0	0	1	28.8	6	54	1.84	0.64	4.1	4.8	5.5	9	50	123.667	0.783454	1	4	0
401940	0	1	0	1	26.6	11	56	1.63	1.41	3.5	4.8	5.2	15	66	117.333	0.824101	1	2	0
406348	0	1	0	3	20.4	6	48	2.09	0.87	3.9	5.9	5.3	19	70	117.667	0.795918	1	1	0
406228	0	2	2	1	15.7	3	77	2.73	0.85	5.1	4.7	5.5	21	64	124.333	0.911111	1	1	0
404520	1	0	0	3	29.7	5	38	2.22	1.1	3.7	4.8	4.9	12	50	111.333	0.765957	1	4	0
411803	0	0	2	3	12.9	6	44	2.72	1.43	4.8	5.3	5	11	90	110	0.849246	1	7	0
401562	0	0	1	3	16.1	8	54	1.88	0.46	3.9	5.8	5.4	15	71	124	0.806032	1	3	0
407861	1	0	0	1	24.3	3	25	2.01	1.68	4.4	5.7	5.6	15	48	105.333	0.776596	1	1	0
411585	0	1	1	4	21.3	5	63	2.28	0.62	4.2	4.66	5.7	59.59	50.94	131	0.823888	1	12	0
410484	1	0	0	1	27.4	3	35	2.45	1.43	4.4	5.3	5.7	9	53	102.667	0.84271	1	3	0
411543	1	0	0	1	29.6	5	39	2.4	1.27	5	4.9	5.5	17	37	109	0.802382	1	2	0
405195	0	1	1	4	19.6	8	20	2.47	0.81	4.2	4.9	4.6	9	95	115.333	0.786802	1	5	0
404387	0	1	1	1	23	10	60	3.15	0.86	4.4	5	5.5	31	65	123.333	0.898876	1	5	0
400868	0	1	0	4	11.4	2	29	3.04	1.17	4.6	5.1	4.5	28	77	125.667	0.800108	1	1	0
409984	0	1	1	2	11.1	5	31	2.41	0.67	4.3	5.29	5.4	14.33	68.27	124.667	0.780667	1	1	0
410442	1	0	0	1	26.5	3	53	3.67	3.2	6.9	5.6	6.1	13	54	110	0.810219	1	1	1
403332	1	0	0	1	21.6	3	44	2.58	0.42	5	5.4	5.7	13	44	99.3333	0.794668	1	5	0
400058	1	0	0	4	37.4	6	71	3.26	1.01	5.4	4.8	4.7	27	52	138.333	0.886598	2	7	1
401744	0	0	0	2	24.2	10	40	2.17	0.73	3.9	5.1	4.5	36	71	112.667	0.902426	1	2	0
406831	0	1	1	1	15.6	7	53	2.11	0.78	4.3	4.6	4.8	17	70	128	0.847826	1	3	1
406039	0	1	1	2	17.8	8	46	1.72	0.57	3.4	5.4	5.2	22	71	98.6667	0.873684	1	5	0
408574	1	0	0	1	29.9	5	36	2.2	0.81	4.8	5.1	5	5	60	94	0.81051	1	2	0
403936	0	0	0	1	6.7	1	22	2.15	0.79	3.7	5.1	4.8	13	61	119.667	0.75	1	0	0
410616	1	0	0	5	28.5	3	56	2.41	0.48	5.1	5.02	6	10.97	52.84	111.333	0.791644	2	6	0
403828	1	0	0	2	22.9	1	17	1.92	0.6	4	5.5	5.3	10	59	123.333	0.706522	2	4	0
410720	1	0	0	2	36.4	11	48	2.77	0.72	4.6	4.6	5.6	18	56	98.6667	0.873508	1	5	0
405843	1	0	0	2	41.8	16	60	4.33	2.88	7.9	11.3	7.6	39	49	128.667	1.04854	3	7	1
400466	1	0	0	1	35.6	9	43	2.64	0.6	4.8	6.1	4.7	18	42	110.667	0.905697	1	0	0
406330	0	0	0	1	30.7	18	53	1.59	1.04	3.1	6.3	5	25	90	129	0.990196	1	2	1
401653	1	0	0	1	40.2	14	70	4.37	2.15	6.8	11.5	7.8	24	72	128.667	1.05231	1	10	1
407294	0	1	0	1	23.1	11	62	3.88	0.64	6.2	5	5.9	10	66	115.333	0.945652	1	2	1
411817	1	0	0	4	35.1	11	49	2.66	0.88	4.5	4.7	5.6	44	54	120.667	0.859879	1	1	0
404612	0	1	1	1	28.5	16	54	2.87	2.26	5	5.4	5.1	21	72	123	0.906542	2	8	1
407185	0	0	1	1	28.5	13	47	2.76	0.71	4.7	5.6	5.7	13	48	107.333	0.94898	1	6	0
401570	0	0	1	1	30.2	14	47	4.12	1.03	6.5	7.4	6.4	88	78	134	0.956857	1	1	1
406428	1	0	0	1	38	14	55	2.26	0.64	4.1	5.7	5.4	20	67	108.667	0.87156	1	6	0
400370	0	2	1	1	24.5	8	28	2.73	0.69	4.1	4.9	4.6	16	68	123.333	0.881748	1	1	0
404727	1	0	0	1	34.7	11	67	3.7	4.5	7.3	6.5	6	21	61	160	0.871287	1	15	1
400498	1	0	0	5	32.8	10	42	1.97	1.27	3.4	5.1	4.7	12	57	122.667	0.76312	1	3	0
401416	1	0	0	1	37.7	11	66	4.57	2.37	6.2	6.5	5.9	21	69	141	0.878185	1	14	1
407032	1	0	0	1	36.6	13	61	3.54	1.94	5.9	5.6	5.4	13	59	140.333	0.99505	1	13	1
403976	1	0	0	2	33.8	8	25	2.27	0.74	3.9	4.9	4.7	14	60	109.333	0.766355	1	3	0
410511	1	0	0	4	31	6	63	2.9	1.81	5	5.2	6.3	16	72	123.667	0.800924	3	3	1
402090	1	0	1	3	30.7	7	34	2.37	0.69	4.1	5.4	4.8	19	48	115	0.905825	1	4	0
410265	1	0	0	1	39.1	17	52	1.95	0.87	4.4	4.8	6	10	51	137	0.888836	1	2	0
400891	1	0	0	1	41.6	17	69	3.84	1.11	4.8	5.7	5.2	17	60	142.667	1.0019	1	10	1
401214	1	0	0	2	32.7	5	38	2.95	0.74	4.3	5.6	4.7	8	44	110.667	0.754481	2	3	0
410728	1	0	0	1	31.1	4	59	2.17	0.34	4.3	5.4	5.9	13	51	136.667	0.872294	1	1	0
411231	1	0	0	1	28.5	6	51	2.46	3.06	4.7	5	5.9	27	53	105	0.930016	1	4	1
400015	1	0	0	1	40.5	15	64	4.44	1.52	6.3	6.6	6	26	59	167.667	0.953368	1	12	1
404230	0	1	2	4	30.4	16	55	2.71	1.01	4.2	5.2	5.2	57	71	143.333	0.883495	1	5	1
402025	1	0	0	2	38.5	16	51	2.15	1.51	4.5	5.8	5.7	63	59	148.667	1.02106	2	4	1
403762	0	0	1	2	33.1	19	59	2.54	2.86	5.1	15.6	9.5	57	74	122	0.985577	3	2	1
403728	1	0	0	1	35.6	8	51	2.79	1.5	4.5	4.3	4.9	70	44	119.667	0.89	1	3	0
401229	1	0	0	2	39.1	12	71	6.68	2.23	7.9	14.7	10.1	16	47	152.667	0.988439	1	15	1
408487	1	0	0	3	38	7	65	2.4	1.44	5.4	4.6	5.3	24	73	129.333	0.776601	1	5	1
405801	1	0	0	1	34.5	5	59	2.61	0.82	5.6	4.7	5.2	19	78	120	0.869318	2	3	1
400802	1	0	1	2	36	11	43	3.05	1.49	4.2	5.6	5.3	38	53	109.333	0.841781	1	3	0
408173	1	0	0	1	34.6	10	54	3.46	2.32	6	5.2	5.7	25	55	118.333	0.908163	1	11	1
410523	1	0	0	2	29.1	4	43	2.19	1.25	5	5.1	5.9	9	65	100.667	0.791113	1	2	0
411314	1	0	0	1	35.6	8	59	3.52	2.05	6.2	5.37	5.6	18.44	62.97	180.667	0.90548	1	3	1
411233	1	0	0	1	33.3	8	54	2.63	1.37	5.1	4.9	5.9	21	43	110	0.838757	1	3	0
411516	1	0	0	1	35.9	10	66	2.55	1.27	4.6	5.9	6.2	17	67	148.333	0.879275	1	2	1
406243	0	1	0	1	30.5	20	54	2.02	0.77	4	5.5	4.7	27	83	118.667	1.03846	1	1	0
406965	1	0	0	1	29.4	6	53	2.11	2.46	4.5	5.5	5.3	12	62	128.667	0.8125	1	1	1
400182	1	0	0	1	33.9	8	53	2.56	0.54	4.3	5.6	5.3	24	41	125.333	0.804927	1	5	0
402686	1	0	0	1	25.6	3	44	2.44	1	4.9	5.25	5.2	18.67	51.47	126	0.803234	1	0	0
406996	1	0	0	1	32.5	6	60	4.7	1.43	7.4	4.94	6.4	15.41	48.05	118.333	0.865169	3	0	1
405945	1	0	0	1	34	10	62	2.85	1.12	4.7	4.9	5.1	15	55	117.333	0.92233	1	1	1
404582	0	1	0	1	29	20	39	3.55	1.89	5.8	7.4	5.7	49	58	151.667	0.981818	2	3	1
406588	1	0	0	3	32.7	9	54	4.58	1.41	7	5.5	5.6	18	53	111.333	0.966667	1	3	1
400567	1	0	0	1	33.7	7	66	2.35	1.13	4.8	5.1	4.7	14	51	116	0.782203	3	1	0
400577	0	2	1	1	29.4	17	61	1.53	2.03	3	5.7	5.3	25	58	134.667	0.920835	1	8	1
411036	1	0	0	1	40.1	14	72	2.21	1.34	4.7	5.5	6.1	14	45	132.333	0.985831	1	4	0
404837	0	1	1	1	17.2	4	34	2	1.07	3.9	5.5	4.6	11	80	130.333	0.78	1	6	0
405403	1	0	0	1	30.2	6	47	2.29	1	4.2	5	4.9	13	64	94.6667	0.777778	2	2	0
406188	1	0	0	1	28.8	5	40	2.36	0.61	4.1	4.7	5.1	11	47	101	0.806818	1	2	0
406508	1	0	0	1	38.9	10	58	2.16	1.64	4.7	5.8	5.9	14	60	133.667	0.843137	1	3	0
410020	0	1	1	1	15.5	1	77	2.09	0.54	4.2	4.73	6.1	9.03	71.99	169.333	0.786251	3	11	1
403343	0	1	1	1	24.1	13	61	3.49	2.25	6.6	5.28	5.9	15.46	75.16	127.333	0.894635	3	3	1
406798	1	0	0	2	35.5	8	42	2.75	1.56	4.9	5	4.8	17	60	102	0.861702	1	1	0
404573	1	0	0	2	22.9	1	25	2.8	0.66	5.1	4.8	5	7	57	115.333	0.761364	1	1	0
402403	1	0	0	1	31	4	39	2.1	1.1	4.2	4.6	5.8	17	53	106	0.866594	1	2	0
400852	1	0	0	1	27.9	5	26	2.99	0.47	4.3	5.3	4.6	19	64	101.667	0.759591	1	4	0
405559	0	2	2	1	31.6	15	61	3.69	2.14	6.5	5.5	4.7	27	73	156	0.979592	1	1	1
400950	1	0	0	1	37.9	10	59	2.7	5.77	5.9	6	5.5	28	49	143.333	1.01235	1	5	1
401937	1	0	0	1	33.4	6	71	1.3	0.83	3.1	10	9.9	19	49	131	0.798954	1	7	1
402949	1	0	0	3	26	4	28	2.31	0.55	3.9	5.6	5.2	9.87	56.35	107.333	0.720796	1	3	0
404232	1	0	0	1	37.1	10	46	2.76	0.93	4.6	5	4.2	10	52	121	0.826923	1	3	0
403736	0	1	1	2	19.2	9	32	2.93	1.06	4.5	5.5	5	29	71	137.333	0.841584	2	8	0
404368	1	0	0	1	27.7	3	27	2.61	0.43	4	4.8	5.5	10	58	100.667	0.868132	1	1	0
410209	0	0	0	2	24.2	9	45	2.21	0.89	4.7	5	5.7	45	70	117	0.81867	1	2	0
405229	1	0	0	1	34.3	5	62	4.1	2.11	7.5	6	5.4	13	56	134.333	0.869565	1	7	1
402901	1	0	0	3	26.4	3	26	2.34	1.3	4.4	5.2	4.6	8	50	112	0.786049	2	5	0
404169	1	0	0	1	27.8	4	25	2.65	0.4	4.9	5	5.2	11	52	115.667	0.729167	1	2	0
405336	0	0	1	1	22	12	45	2.36	0.91	4.4	5.3	5.2	31	81	116	0.843137	2	2	0
407211	1	0	0	1	33.2	10	49	1.4	1.08	3.3	4.8	5.8	11	55	113.667	0.842593	1	1	0
403722	1	0	0	1	26.8	3	31	2.74	0.96	4.8	5	5	27	59	108	0.777778	2	3	0
410380	1	0	0	1	32.7	9	46	3.38	1.28	6.6	5.8	5.8	18	57	124	0.94062	1	5	1
404306	0	0	0	3	16.9	5	41	3.01	1.1	4.3	6	5.3	21	72	128.667	0.853933	1	7	0
406022	0	0	1	2	16.9	6	30	2.18	0.81	4.2	5.1	5.2	61	78	121	0.791667	1	4	0
405962	0	2	1	1	24	15	54	1.42	1.45	3.1	5.3	5.4	18	68	114.333	0.915493	1	2	0
408124	1	0	0	1	37.4	14	52	2.27	0.96	4.3	5.2	6	17	54	133.333	0.853774	1	3	0
404826	1	0	0	1	26.7	4	25	1.95	0.8	4	4.4	5	13	47	102.667	0.729167	1	2	0
404392	0	0	0	2	28.8	18	47	3.11	0.66	4	5.41	6.4	23.46	59.11	138	0.927273	1	2	1
410023	1	0	0	2	32.4	9	47	2.42	0.68	4.4	5.11	5.7	12.98	46.79	120.667	0.857288	1	2	0
406150	1	0	0	1	40.6	13	73	2.18	3.8	4.9	5.91	5.8	20.77	58.24	162	0.96	1	8	1
410285	1	0	0	2	32.8	8	65	3.36	1.79	5.5	5.8	5.9	17	49	139	0.931112	2	4	1
401683	1	0	0	2	32.6	5	38	2.37	0.82	4.7	5.5	5.5	8	55	108.667	0.866703	1	2	0
401651	0	0	0	1	24.8	11	52	2.7	0.81	4.8	5.4	5.3	23	68	108.667	0.858649	1	2	0
411686	1	0	0	1	24.6	4	36	1.84	0.76	3.8	5.1	6	16	57	120.667	0.789417	1	5	0
402722	1	0	0	5	29.4	5	43	2.23	0.75	5	5.5	5.2	10	49	102.667	0.854628	1	4	0
411629	1	0	0	1	33.6	8	54	2.06	1.07	3.8	5.28	5.5	11.65	58.53	110.333	0.857935	1	5	0
404623	1	0	0	1	25.5	3	29	1.78	0.83	3.6	4.5	5.1	15	54	106.333	0.75	1	4	0
411334	0	1	1	1	21.7	8	64	2.44	1.12	4.7	6	6.1	13	77	118.333	0.899468	1	3	0
411619	0	0	0	1	28.7	15	51	2.01	1.29	3.7	5.17	5.3	18.19	73.17	106.333	0.889931	1	0	0
411553	0	1	0	1	19.5	8	54	2.08	0.78	3.7	4.5	5.7	13	71	121.667	0.863456	1	5	0
404967	1	0	0	2	33.6	7	44	2.59	0.51	4.5	4.5	4.9	9	61	98.6667	0.776699	1	1	0
409862	0	1	1	1	16.4	2	65	2.52	0.54	4.2	5.1	6.1	39.8	63.46	105	0.741055	3	1	0
405991	1	0	0	2	30.4	7	29	1.87	1.13	4.4	4.7	5.3	17	59	115	0.826531	1	6	0
400416	1	0	0	1	27.9	4	41	2.72	1.09	4.6	5.6	5.1	17	43	131.333	0.818667	1	1	0
402073	0	1	0	1	20	7	58	2.15	1.05	4.6	5	5.2	15	66	118	0.892779	1	4	0
402759	1	0	0	2	26.6	4	30	2.7	0.7	4.7	4.2	5.6	11	55	109	0.754295	1	2	0
406608	0	2	0	4	25.4	8	54	1.58	1.34	3.8	4.9	5.8	83	61	105.667	0.885417	3	5	1
406634	1	0	0	1	28	5	38	1.71	0.46	3.7	5.4	5.3	11	44	109	0.833333	1	5	0
407935	1	0	0	2	25.3	3	35	1.78	0.52	4.7	5.6	5.6	7	41	100.333	0.839081	1	4	0
408542	0	1	0	4	22.5	9	45	2.59	0.7	4.9	5.5	5.3	9	62	120.667	0.954368	1	1	0
403575	1	0	0	4	32.3	7	31	1.94	0.96	3.6	5.2	5	17	44	119.333	0.843137	1	5	0
404405	1	0	0	3	26.9	4	40	2.66	0.81	4.3	5.7	5.7	13	56	120.333	0.789474	1	4	0
405914	0	2	0	1	28.2	20	68	2.54	3	4.9	6.6	7.7	28	61	138	1.0098	1	4	1
404617	0	2	0	2	27.8	12	65	2.36	1.19	4.7	6.8	5.2	32	79	132.667	0.925532	1	2	0
406305	1	0	0	1	39.6	9	63	3.41	2.16	5.7	5.4	5.9	29	39	158	1.02273	1	4	1
401678	0	0	1	1	29.7	5	28	2.92	1.36	4.9	5.6	5.2	21	63	113	0.854188	2	5	0
406667	1	0	0	4	39	12	54	3.66	1.18	6	4.6	5.3	23	54	102.333	0.934579	1	8	1
405396	0	0	0	1	27.1	17	58	2.8	1.31	5	5.8	5.2	25	70	107.333	0.892157	1	1	0
405837	1	0	0	1	38.6	14	58	2.15	1.06	4.2	5.4	5.7	14	66	105.333	1	1	1	0
411780	0	0	0	1	30.7	20	72	3.29	1.29	5.3	6	6	17	74	155.667	0.985577	1	4	1
402203	1	0	0	3	34.9	10	63	3.4	1.21	5.7	6.1	6.4	24	49	131.333	0.971475	2	9	1
411070	1	0	0	5	29.9	5	42	2.01	0.74	3.5	5.2	6	19	42	109.333	0.862998	1	1	0
410613	1	0	0	2	31.1	5	31	2.34	0.89	4.7	5.03	5.2	9.8	52.42	96.3333	0.848677	1	6	0
400787	0	0	0	1	29.6	17	66	3.58	1.38	4.6	7.8	7	19	69	122.333	0.859879	1	1	1
403284	1	0	0	1	39.9	14	66	4.25	1.82	7.2	5.1	5.9	19	54	116.667	0.884976	1	7	1
403239	1	0	0	1	36.5	10	74	3.54	1.85	6.3	6.4	6	18	55	162	0.841246	3	3	1
407674	0	0	0	1	28.9	17	69	3.3	1.51	5.9	5.9	6.2	14	60	164.333	1.00532	1	2	1
401866	1	0	0	2	31.8	8	46	2.77	1.38	4.9	5.2	5.1	7	48	123	0.831969	1	4	0
402118	1	0	0	4	30.4	6	48	1.54	0.77	3.3	4.7	5.4	13	52	127.333	0.767677	1	5	0
411475	1	0	0	3	30.6	4	61	2.08	1.68	4.1	5.5	5.9	13	51	115.667	0.789501	1	9	0
405128	0	1	0	1	26.1	14	68	3.41	0.9	5.4	5.1	5.5	13	67	121.667	0.895833	1	2	1
405926	1	0	1	1	33	8	48	2.17	0.61	4.2	4.5	5.1	11	65	111.667	0.814815	1	2	0
404157	0	2	0	1	29.9	20	69	2.74	5.79	5.2	5.6	5.3	30	63	169	1.01923	1	3	1
400288	0	0	0	2	30.6	13	57	2.74	0.81	4.7	5.9	5	15	68	129.333	0.845966	2	2	1
411764	1	0	0	2	33.8	8	53	2.28	6.72	5.7	5.3	6.7	16	56	111.333	0.905702	1	2	1
400378	1	0	0	1	34.9	8	45	3.11	1.34	4.4	5.2	4.6	22	44	111.667	0.86506	1	2	1
402208	1	0	0	1	37.8	12	66	3.46	1.55	6.3	4.9	5.4	33	75	120.667	0.94436	3	4	1
409913	1	0	0	4	40.2	13	60	2.88	1	5.2	8.48	8.3	19.98	51.85	115.333	1.07067	1	20	1
405503	0	2	0	1	29.2	22	76	2.66	0.68	4.7	5.4	5	8	129	119.333	0.903846	2	3	1
407256	0	2	2	2	23.8	17	63	2.19	0.64	4	5.9	6	16	61	126	0.839623	1	4	0
406185	0	0	1	3	18	7	44	1.63	0.76	4.4	5.9	5.1	21	67	111.333	0.860215	1	1	0
408366	0	0	1	1	25.2	14	61	4.08	1.09	6.5	5.3	6.1	10	78	162	0.936842	1	2	1
407639	1	0	0	2	39.4	13	64	2.67	2.28	4.8	6.6	6.4	15	47	128	1.00971	1	4	1
405567	0	1	1	5	25.3	14	58	2.4	1.01	4.2	4.8	4.7	22	77	112.333	0.859813	1	9	0
406419	1	0	0	4	33.9	5	31	2.15	0.58	4.6	5.1	5.3	11	52	132.333	0.826087	3	4	0
402391	1	0	0	1	35.1	8	60	2.91	1.17	5	5.4	6	16	58	115.667	1.073	1	3	0
410733	1	0	0	1	24	3	45	1.3	0.49	3.3	4.6	5.3	9	52	122	0.837979	1	2	0
408156	1	0	0	1	31.7	6	55	2.84	1.36	5.1	4.9	5.9	27	61	122	0.83	1	4	0
407155	0	1	0	1	20.8	10	66	2.93	1.26	5	6.2	6.2	46	70	123.667	0.9	2	2	0
402523	1	0	0	1	39.4	11	66	3.92	1.48	6.5	5.4	6	33	56	113	0.890281	1	7	1
402104	1	0	0	1	27.1	6	47	1.99	1	3.9	5.7	5.5	15	66	123	0.817859	1	6	0
406117	1	0	0	1	41.4	15	72	3.17	1.79	5.5	6.3	6.2	21	65	177	1.0098	3	2	1
408569	1	0	0	1	35.4	12	41	1.87	1.21	4.2	5.5	5.2	14	50	137.333	0.894864	1	0	0
403325	1	0	0	1	31.5	7	68	2.56	1.26	4.9	5	5.3	82	55	115	0.823624	2	2	0
403401	1	0	0	1	40.3	16	54	2.82	2.73	5.2	5.48	5.7	20.15	53.18	134.667	1.02031	1	1	1
401586	1	0	0	1	33.1	10	43	3.08	1.14	5.1	5	5.5	28	52	133.333	0.88229	1	2	0
402365	1	0	0	1	40.5	7	68	1.75	1.08	4.5	4.3	6	13	48	137.333	0.888312	1	7	1
411080	1	0	0	1	34.3	7	26	2.54	0.95	4.2	4.8	5.8	14	47	110.333	0.985552	1	3	0
407518	1	0	0	1	35.2	10	46	2.44	1.43	4.5	4.97	5.7	14.59	54.12	120	0.894231	1	0	0
402302	1	0	0	1	33.9	9	62	2.51	1.19	4.6	6.4	4.6	11	50	131.333	0.974287	1	2	0
411662	0	2	1	1	30.1	18	67	2.46	1	4.3	5.5	6.8	23	64	133.333	0.927581	1	4	1
401330	0	1	0	1	22.4	8	62	7.04	2.96	8.4	5.3	5.7	23	71	120	0.79103	1	4	1
410350	0	2	2	1	27.9	17	70	2.47	1.1	4.8	5.3	5.8	29	96	132.333	0.948779	1	5	1
408125	0	1	1	1	18.2	9	37	2.11	1.45	4.1	6.3	5.4	11	61	115.667	0.923469	1	2	0
410458	1	0	0	1	38.8	14	64	3.45	1.67	6.2	6	6.8	21	59	128	0.922052	1	4	1
401650	1	0	0	1	30.1	5	50	2.44	0.7	5.1	5.1	5	12	59	118.667	0.81461	1	6	0
404616	1	0	0	1	31.8	8	45	2.69	1.6	5	5.4	5.2	18	52	105	0.792079	1	5	0
406978	1	0	0	1	37.9	11	68	2.08	1.58	4.1	5.6	6.1	15	61	139.667	0.989583	3	2	1
403887	0	1	2	4	10	3	35	1.98	0.44	3.7	5.7	5	13	63	127.667	0.879121	1	4	0
402770	0	0	0	2	24.8	12	45	2.82	1.18	5.1	5.2	5.8	12	65	118	0.909238	1	3	0
405482	1	0	0	1	19.8	2	27	1.9	0.45	4.2	4.7	5	6	50	102	0.758427	1	2	0
411620	1	0	0	1	31.9	3	53	2.08	0.85	4.1	5.2	5.5	14	45	114.333	0.725834	1	2	0
408528	1	0	0	1	28	5	38	2.43	1.38	4.7	4.6	5.4	12	52	124.333	0.817522	1	7	0
404471	0	0	0	1	23.6	11	76	5.17	2.14	8.8	5.9	5.6	13	82	155.667	0.892473	1	1	1
411503	0	0	0	2	24.6	13	55	2.57	1.43	4.3	5.6	5.3	30	71	136	0.955135	1	7	0
405995	1	0	0	1	34.9	9	55	2.74	0.91	5	4.9	5.4	20	62	102.333	0.854369	1	1	0
405793	1	0	0	1	33.9	6	67	4.28	1.22	6.9	5.7	5.7	12	56	116	0.826531	2	2	1
407844	1	0	0	2	29.5	4	53	2.13	1.21	4.6	6.1	5.8	11	55	113	0.692708	1	3	0
408049	1	0	0	4	25.8	2	18	2.66	0.96	4.7	4.7	5.6	12	54	120.333	0.768421	1	2	0
410248	1	0	0	1	30.2	5	49	2.15	1.51	4.6	4.8	6	25	46	108	0.797347	1	0	0
400077	0	0	2	1	28.2	13	83	2.29	2.91	5.8	6.7	5.3	17	77	141	0.834667	3	4	1
403892	0	1	1	3	23.8	10	28	2.03	0.61	3.6	5.5	5.4	28	68	122	0.872549	1	5	0
407140	1	0	0	1	27.9	4	35	2.54	0.72	5	4.7	6	14	54	112.667	0.711111	1	9	0
410153	0	1	0	1	23.5	9	58	2.81	1.16	5	5.7	5.8	12	63	127.333	0.798311	1	3	0
406271	1	0	0	1	32.9	7	31	2.41	0.77	4.4	5.6	5.2	9	58	113.333	0.821782	1	2	0
405236	1	0	0	1	26.4	4	31	2.02	1.28	4.2	5.3	4.5	23	60	101	0.73	1	1	0
406873	1	0	0	1	32.2	7	38	2.94	1.5	5.1	5.2	4.6	23	59	110.667	0.885417	1	3	0
401962	1	0	0	3	36.7	10	48	2.46	1.23	4.3	6.1	5.4	17	62	128.333	0.883359	1	1	0
408009	0	1	0	1	24.9	11	54	2.16	1.85	3.9	5.7	7	17	70	110.667	0.947368	1	6	1
409736	1	0	0	2	26.5	4	29	1.85	1.01	3.9	4.9	5.4	11	59	104.667	0.780427	1	4	0
407742	1	0	0	1	27.4	4	43	1.74	0.96	4.3	4.7	6	19	61	118	0.764045	1	0	0
406743	1	0	0	2	22.5	2	32	1.97	0.67	4.3	4.3	4.9	7	53	112.667	0.723404	1	5	0
401038	1	0	0	1	32.9	5	67	5.06	2.55	8.4	11.3	8.3	30	66	111.333	0.825762	1	5	1
406274	1	0	0	3	38.6	9	59	2.01	2.28	4.2	5	5.6	23	74	107.667	0.925532	3	8	1
405997	0	1	1	3	21.2	8	33	1.37	0.77	3.3	5.1	5	20	70	110.333	0.843137	1	2	0
400847	1	0	0	1	26.6	3	61	3.22	1.1	4.6	5.6	5.2	16	44	132	0.774461	1	2	0
406157	0	0	1	2	18.1	8	27	1.58	0.55	3.1	5.67	5.8	19.83	70.82	98.6667	0.838384	1	1	0
406522	1	0	0	1	29.5	4	34	2.3	1.06	4.7	4.73	5.5	17.05	58.49	105	0.72449	1	1	0
407493	0	0	0	1	16.1	5	52	2.39	0.66	4.2	4.72	5.9	19.79	63.69	130.667	0.926136	1	9	0
402854	0	0	1	2	23.8	6	46	2.53	1.08	4.7	5.3	5.3	19	71	107.333	0.887414	1	3	0
400833	1	0	0	1	26.3	2	27	2.71	0.68	4.1	5	5	10	55	94.3333	0.574094	1	3	0
408138	1	0	0	1	38.6	4	31	2.8	0.49	4.6	4.6	5.9	15	45	106	0.794737	1	3	0
403654	0	0	1	1	30.2	12	64	2.41	0.86	4.9	5.9	5.1	14	73	117	0.901961	2	5	0
407170	1	0	0	3	23.2	2	30	1.72	0.57	4	4.8	5.4	8	44	100	0.741177	1	1	0
405200	1	0	0	4	32.2	6	50	2.28	0.66	4.6	5.2	5.2	31	55	106	0.814433	1	0	0
401665	1	0	0	2	31.6	5	34	1.56	0.91	4.2	4.7	5.1	17	56	105.333	0.690016	1	3	0
405108	1	0	0	3	30	4	36	1.85	0.63	3.7	4.6	5.2	21	61	94.3333	1.02717	1	5	0
408135	1	0	0	1	29.9	6	52	2.23	0.73	4.7	4.9	5.8	12	52	112	0.758974	1	1	0
403923	1	0	0	1	24.8	2	41	1.64	1.21	4.5	5.5	5.2	11	46	116.667	0.865169	1	1	0
409612	1	0	0	3	30	5	47	2.26	1.03	4.1	5.5	6	8	45	122	0.781701	1	5	0
407752	1	0	0	4	35.1	7	58	2.38	0.87	4.5	5.2	5.4	22	52	126	0.862745	2	2	0
410272	1	0	0	2	29	5	53	3.63	0.85	5.8	5	5.7	15	51	147.333	0.789617	1	9	1
407052	0	0	0	1	26.9	17	64	2.18	0.86	4.2	6.2	5.4	13	83	127.667	0.958763	2	2	1
403156	1	0	0	1	37.1	11	52	2.85	1.24	4.9	4.4	5.2	13	41	125.333	0.956253	1	1	0
406292	0	2	0	1	30.9	19	54	1.5	4.68	3.8	5.5	5.6	26	82	150.333	1.02475	3	3	1
407223	1	0	0	1	33.5	11	44	2.82	0.77	5.2	4.9	5.5	20	55	122	0.784504	1	2	1
407420	0	0	0	1	22.6	12	47	2.11	1.29	4.1	4.94	5.5	28.55	73.43	117.333	0.856436	1	3	1
406553	1	0	0	1	39	15	62	3.96	2.44	6.6	5.84	5.8	20.39	61.88	149.333	1.0099	2	4	1
401587	0	1	1	1	31.2	16	60	3.79	1.92	6.1	5.9	5.6	60	79	132	0.902757	1	2	1
400329	1	0	0	1	33.5	8	45	1.6	1.07	3.2	5.6	4.8	14	43	120.667	0.858962	3	2	0
402251	1	0	0	1	38.7	14	53	2.42	0.96	4.5	5.9	6.4	36	55	114.333	0.999109	1	4	0
404917	1	0	0	1	38.7	11	51	2.45	1.21	4.7	5.6	5.1	16	45	121.333	0.864078	1	0	0
410010	0	2	0	1	28.8	14	70	3.84	0.98	6.1	5.15	6.2	16.73	70.82	151.333	0.90567	2	1	1
403895	1	0	0	1	39.1	13	36	1.77	1.34	3.4	5.9	5.1	20	46	118.333	0.97	1	3	0
406669	0	0	1	1	25.2	9	57	2.72	0.91	5	5.4	5.1	10	57	126	0.905263	1	0	0
408273	1	0	0	1	39.3	13	71	2.61	1.94	5.3	5.7	5.9	15	53	140.667	0.9	1	7	1
404954	0	2	0	2	23.1	9	27	2.18	0.96	4.7	4.9	5.3	54	84	108.667	0.8	1	2	0
404599	0	2	0	1	27.7	11	68	5.32	1.61	8.2	6.5	7.8	15	116	167.333	0.922222	2	5	1
410430	1	0	0	4	41.4	18	60	3.67	1.06	6.5	5.3	5.3	70	49	128	0.957909	2	11	1
411720	1	0	0	1	37.1	12	68	1.98	3.05	4.7	5.4	5.9	16	39	148	0.974869	3	8	1
403696	1	0	0	3	27.6	4	42	1.69	1.47	3.7	4.7	4.4	18	52	126.333	0.813187	1	4	0
404633	0	0	0	1	17.3	8	34	2.09	1.52	4.1	5.5	4.7	18	105	123	0.845361	1	2	0
402183	1	0	0	1	34.9	6	66	3.42	1.87	5.8	5.2	5.6	20	55	99	0.908618	2	5	1
407171	1	0	0	1	42.5	23	72	2.53	2.82	5.1	5	6.3	25	90	115	1.02913	3	12	1
407541	0	1	2	2	31	16	66	3.12	1.35	5.1	7.2	6	11	93	193.667	0.950495	3	7	1
411083	1	0	0	1	41.1	13	71	2.58	1.46	4.7	4.9	5.6	15	70	146.667	0.985051	3	4	1
402972	1	0	0	5	38	14	50	3.09	4.79	5.7	7.67	6.7	33.06	56.85	118.333	0.858437	1	4	1
408370	1	0	0	1	49.9	17	65	3.64	3.71	6.3	13	10	165	59	120.667	1.015	2	5	1
404881	0	2	0	1	32.1	21	55	1.98	1.03	3.7	7.8	7.8	37	70	132.667	1.00909	3	6	1
401833	1	0	0	1	29	4	38	2.67	1.33	4.9	5.1	4.7	10	54	117	0.80713	1	1	0
409676	1	0	1	1	28.7	5	39	1.79	0.76	3.3	5	6.1	12	56	114	0.774339	1	5	0
402973	1	0	1	2	34.6	8	51	2.94	0.94	5.1	4.82	5.7	12.06	50.1	105.333	0.868884	1	2	0
409709	0	0	1	1	15.1	6	38	2.88	1.05	4.9	4.7	5.4	12	57	123	0.880194	1	3	0
406317	0	0	1	1	24.9	12	31	2.71	1.37	4.8	5.5	5.5	29	74	128.667	0.941176	1	2	0
410553	0	2	2	1	30.5	19	68	2.89	5.04	6	6	6.8	22	68	147.667	0.948419	2	1	1
405189	1	0	0	2	27.8	4	29	2.73	0.78	4.9	5	5	15	51	103.667	0.76087	1	3	0
411526	0	2	0	1	25.4	14	63	2.08	0.6	4.1	4.36	5.8	24.65	55.03	123.667	0.873412	1	3	0
411299	1	0	0	1	38.7	14	68	2.04	0.91	4.7	8.25	8.5	13.01	50.23	147.333	0.850869	2	3	1
405986	0	0	0	2	24	16	55	2.53	0.63	4.4	4.7	5	31	76	114.667	0.895238	1	2	0
410510	1	0	0	2	31.4	4	60	2.96	1.69	5.1	6.2	6.2	10	70	130.333	0.947339	1	8	1
405994	1	0	0	1	29.1	5	40	2.13	0.93	4.4	5.7	5.1	9	53	116.667	0.845361	1	5	0
402352	1	0	0	1	29.9	5	40	2.04	1.26	3.9	4.6	5.8	13	58	98.6667	0.801892	1	1	0
411395	1	0	0	1	34.5	10	50	2.37	1.18	4.8	5.34	5.2	23.1	54.24	116.667	0.916459	1	3	0
402876	1	0	0	1	26.2	3	41	2.38	1.52	4.7	5.9	5.5	11	60	115.333	0.731477	1	0	0
406088	0	0	0	2	29.8	19	38	2.52	1.6	4.3	4.7	5.2	62	86	118	1.00476	1	5	1
402133	0	1	1	1	21.5	8	52	2.15	1.64	4.1	4.4	5.1	31	74	139	0.950292	1	5	1
404460	1	0	0	1	26.1	2	29	2.39	0.56	4.3	5	4.9	10	47	108.667	0.722222	1	1	0
403954	1	0	0	2	30.8	6	52	2.42	1.09	4.2	4.8	4.1	15	56	112.333	0.870968	1	10	0
410585	0	1	1	1	27.4	16	50	2.74	0.78	4.5	5.1	5.8	23	82	115.333	0.938053	1	3	0
405812	1	0	0	1	36.5	13	50	2.59	1.48	4.7	5.6	5.8	17	53	127	0.91	1	2	0
409656	1	0	0	1	34.6	7	49	2.4	0.86	4.2	5.8	5.6	15	51	117.333	0.774476	1	6	1
404465	1	0	0	1	36.7	12	60	2.27	2.81	4.1	8.5	6.9	19	60	172	1.08511	1	3	1
407645	1	0	0	1	46.5	9	52	2.86	1.5	5.3	6	6.6	27	61	124	0.8125	1	2	1
410116	1	0	0	1	33.8	9	46	2.71	0.85	4.6	5.3	5.7	18	43	137.333	0.804018	1	1	0
402455	0	2	2	1	23.5	8	67	2.54	0.74	4.3	5.77	5.8	15.16	66.67	110.667	0.924959	1	4	0
406024	1	0	0	1	32.4	7	46	2.03	1.01	4.1	5.1	4.7	11	82	125	0.823232	1	2	0
403952	1	0	0	2	24.7	2	22	2.07	0.53	3.8	4.6	4.6	8	44	105.667	0.816092	1	2	0
400319	0	0	1	3	25.9	8	61	2.32	0.97	4	6	5.2	14	70	122.667	0.997625	2	2	0
401610	1	0	0	1	31.1	5	62	2.45	1.27	5.1	5.2	5.4	22	52	119.333	0.74691	1	2	1
411060	1	0	0	2	35.6	7	51	2.42	1.38	4.8	5.6	5.8	11	49	116.667	0.872523	1	5	0
407896	1	0	0	1	32.8	7	36	2.18	0.82	4	4.7	5.6	12	65	113.667	0.77451	1	6	0
403605	1	0	0	1	38.2	9	66	2.75	0.77	5	5.8	5.4	16	45	137.333	0.92233	1	5	0
402613	1	0	0	1	32	5	48	2.61	0.79	5	5	5	11	52	98	0.77151	1	5	0
406485	1	0	0	4	19.5	2	29	1.73	0.44	4	5.7	5.8	10	62	101.333	0.761364	1	4	0
400857	1	0	0	1	33.2	7	59	3.88	0.99	5.4	6.2	5	13	60	140.667	0.818561	3	1	1
404589	1	0	0	3	24.1	3	32	2.51	0.52	4.9	5.1	4.5	11	66	108.333	0.736842	1	1	0
404459	1	0	0	2	30.5	5	27	2.35	0.63	3.7	4.9	5	9	55	111.333	0.792079	2	8	0
404367	1	0	0	1	36.2	10	54	3.16	1.41	4.8	5.4	6.3	14	54	138.667	0.870968	1	3	1
404371	1	0	0	1	37.1	12	57	4.84	1.36	6.4	5.7	5.7	20	65	163.333	0.87963	3	1	1
403291	1	0	0	1	34.1	9	42	2.49	1.51	5	4.8	5.6	13	69	108	0.837696	1	0	0
411149	1	0	0	1	33.5	5	50	2.71	1.41	5.1	4.5	6	20	58	123	0.892351	1	1	0
406020	1	0	0	2	29.8	5	40	2.46	0.51	4.6	5.8	5.6	17	55	115.667	0.860104	3	5	0
410815	1	0	0	2	36.6	12	60	2.99	2.49	5.4	6.2	6.3	26	48	138.667	0.933943	2	8	1
405727	1	0	0	1	40.1	20	47	2.47	1.1	4.4	4.8	5.6	13	58	126	0.857143	1	1	0
410283	1	0	0	4	37.7	11	68	3.2	2.54	5.7	8.56	6.5	9.78	65.55	147.667	1.00821	1	2	1
407129	1	0	0	1	24.7	3	30	2.6	1.03	4.8	5	5.5	7	66	106	0.715789	1	2	0
406752	1	0	0	1	28.5	5	41	2.25	0.57	4.5	4.8	5.3	20	43	133.667	0.8125	1	2	0
404095	1	0	0	2	23	2	29	2.57	0.58	3.9	4.5	4.5	16	65	112.667	0.770115	1	1	0
406481	1	0	0	1	34.6	10	46	2.44	0.82	4.4	5.8	5.1	9	56	122	0.925532	1	5	0
411728	1	0	0	3	35.6	9	39	2.09	1.08	4.3	4.8	5.5	14	50	105	0.903134	1	9	0
410836	0	0	0	1	17.1	9	63	3.17	1.28	5.6	5.2	6	11	61	150	0.855256	1	4	1
404200	1	0	0	1	35.9	7	56	2.28	0.92	3.6	5.1	4.4	11	55	105.667	0.927835	1	2	0
405343	0	1	1	1	13.2	6	41	2.59	1.19	4.7	5	5	15	78	138.667	0.791667	1	2	0
406138	1	0	0	1	30.9	6	47	2.34	0.6	4.9	4.9	5.4	19	52	101.333	0.882979	1	1	0
400320	1	0	0	1	33	6	33	2.99	1.02	4.3	5.2	4.8	32	46	103.667	0.870397	1	4	0
410067	0	2	1	1	23.2	10	50	2.53	1.13	5.1	5	5.2	8	65	127	0.863706	1	1	0
411428	1	0	0	3	26.2	3	51	2.33	0.77	5	5.7	5.8	13.33	59.44	114	0.9746	1	3	0
403726	1	0	0	2	28.3	5	50	2.71	0.79	5	5.2	4.9	14	60	134	0.787234	2	4	0
411736	0	1	1	1	27.2	12	65	2.68	1.32	4.8	4.7	5.3	24	67	112.333	0.847826	1	5	0
405219	0	0	0	1	29.5	11	50	2.59	1.43	5.1	5.2	4.9	16	82	126	0.917526	1	0	0
402603	1	0	0	3	23.5	2	30	2.04	0.81	4.1	5.57	4.9	6.13	56.29	101	0.783648	1	3	0
405039	1	0	0	2	33	7	35	2.02	1.11	3.9	5.7	5	16	53	109.667	0.847619	1	5	0
406287	1	0	0	1	30.8	7	34	1.78	0.87	3.4	5	5.4	8	48	112.333	0.805825	1	1	0
407472	0	1	0	3	13.5	3	25	2.36	1.56	4.8	4.18	5.4	24.36	70.58	118.333	0.825581	1	2	0
400070	1	0	0	1	20.4	2	36	2.24	1.02	5.1	5.4	4.8	11	46	125.333	0.78098	1	4	0
410917	1	0	0	3	22	3	33	2.16	0.71	4.2	4.5	5.2	6	59	110.333	0.758995	1	3	0
403791	0	1	1	2	18.3	7	46	3.07	0.77	4.5	5.8	4.9	18	84	127.667	0.863158	1	1	0
402853	1	0	0	1	32.5	5	38	2.34	1.17	5	5.6	5.6	17	58	96.6667	0.784505	3	4	0
401645	1	0	0	1	31.7	5	55	1.86	0.93	3.8	5.6	5.2	21	69	140	0.861603	3	3	1
404067	0	1	1	1	35.3	12	66	3.36	1.91	4.4	4.7	5	15	66	130	1.02105	3	4	1
411481	0	2	1	4	28.4	17	69	2.6	2.26	4.6	5.2	5.8	37	72	156	0.956476	2	13	1
408548	1	0	0	1	31.7	6	35	2.15	0.85	4.5	5	4.2	24	54	106.667	0.875667	1	1	0
406273	0	1	1	1	29.3	16	62	3.4	1.48	5.4	5.7	6.2	17	86	143.333	0.96	1	3	1
406090	0	2	0	1	20.7	11	72	1.89	0.7	3.9	4.09	6.2	14.65	76.12	168.333	0.885417	2	4	1
405489	0	0	0	1	25.3	15	47	2.37	0.91	4.2	5.7	5.4	24	70	125.667	0.932692	2	2	0
400149	1	0	0	2	41	12	63	4.48	1.39	6.6	7.6	6.9	52	49	153.667	0.853895	3	5	1
409928	1	0	0	1	41.3	17	70	2.37	1.49	5.1	5.37	6.1	16.88	73.08	156	0.976031	1	2	1
405096	0	2	0	1	25.9	15	45	2.03	2.02	3.6	6.8	5.5	18	105	100.333	0.906542	1	2	1
400921	1	0	0	1	40.2	13	68	3.32	3.21	5.9	9.5	6.4	17	59	156.333	0.886212	2	7	1
404026	1	0	0	2	36.3	9	42	3.12	1.22	4.3	5.5	4.5	12	61	121	0.778846	1	3	0
404777	1	0	0	4	32.7	8	72	1.93	1.38	3.8	7.9	7.3	15	50	138.667	0.894737	2	5	1
407004	1	0	0	2	34.2	9	70	3.19	1.37	6.4	6.2	5.6	16	56	174.333	0.971264	1	8	1
406741	1	0	0	2	36.4	11	35	3.05	1.26	5.1	4.7	5.5	12	44	131.667	0.878505	2	1	0
406312	0	1	0	2	24.9	14	51	2.46	1.17	4.5	5.5	5.4	23	71	122.667	0.98	3	5	0
410973	1	0	0	2	30.3	5	27	1.38	0.84	3.2	4.2	5	11	52	106	0.782037	1	1	0
408041	1	0	0	1	33.7	7	45	2.26	0.65	4	5.1	5.8	12	56	94.3333	0.87	1	1	0
401386	1	0	0	2	35.4	8	59	3.38	1.5	4.7	4.7	5	21	50	108	0.800106	1	10	0
408198	1	0	0	1	41.6	19	62	2.97	3.31	5.2	7.2	6.8	51	73	116.333	0.856482	1	2	1
400811	0	2	1	1	31	10	61	2.93	1.42	4.2	9.2	8	22	56	156	0.938686	3	2	1
404433	0	1	0	1	20.9	10	55	2.29	0.49	4	6.1	6	23	49	124.667	0.875	1	2	0
404891	1	0	0	2	30.6	6	34	2.45	1.1	4.6	5	5	15	58	100.333	0.811881	1	3	0
401841	1	0	0	1	32.8	8	51	2.81	1.28	5.1	5.2	4.9	12	56	137.333	0.832523	1	4	0
404408	1	0	0	2	32.8	6	48	3.03	0.87	4.4	5.2	5.3	15	41	121.333	0.864583	1	8	0
404792	1	0	0	2	36.2	10	46	2.74	1.25	4.8	5.2	5.2	12	64	116.667	0.838095	1	3	0
404515	0	1	0	2	11	4	26	3.35	0.75	4.6	5	5.2	9	75	103	0.715789	2	2	0
409665	1	0	0	1	35.9	11	46	2.02	1.14	4.1	5.7	6	14	41	114.333	0.905593	1	1	0
406891	0	1	0	5	22.8	8	28	2.79	1.16	4.7	5	5	10	86	107	0.885417	1	2	0
410413	0	2	1	4	23.5	7	72	2.66	0.65	5.1	5.4	5.8	19	77	132.333	0.899392	1	5	1
406742	1	0	0	2	34.5	8	42	2.8	1.21	5	5.8	5.3	7	62	112.333	0.783019	1	0	0
408439	0	2	1	1	35.6	30	63	2.2	3.27	4.2	6.05	6.2	33.94	83.82	136.333	1.06087	2	6	1
410584	1	0	0	1	33.6	7	49	2.09	0.45	4	4.4	5.6	11	51	112.333	0.781343	1	4	0
411678	1	0	0	1	26	4	61	1.63	1.36	4.2	4.5	5.7	20	52	112	0.804878	1	2	0
411366	1	0	0	2	17.5	2	33	2.22	0.66	4.7	5.07	4.8	17.88	46.82	96.6667	0.721416	2	6	0
401006	0	1	1	3	15.8	5	53	2.14	1.46	5	6.6	5.9	22	68	124.333	0.817401	1	2	0
400096	1	0	0	2	35	8	30	2.18	0.65	5	5.3	4.4	18	41	109.333	0.806422	1	1	0
410052	1	0	0	5	36.3	4	71	3.48	2.62	6.7	4.7	5.4	19	57	157.333	0.751578	3	5	1
405538	1	0	0	1	27.2	4	61	2.44	0.84	5	5	5.4	14	57	134	0.860465	1	11	0
404718	1	0	0	3	29.2	4	36	2.55	0.75	4.4	5.3	5	15	60	122.667	0.787234	1	5	0
401458	1	0	0	1	34.8	7	67	3.29	1.19	5.1	6.5	6.1	13	56	135.333	0.828666	1	2	1
401568	0	1	0	3	17.4	5	25	2.85	1.19	4.8	4.6	4.7	27	83	108.667	0.911584	1	2	0
402864	1	0	0	1	33.4	7	42	2.22	0.73	5	5.2	4.7	10	58	106	0.848114	1	4	0
408480	1	0	0	1	33.7	8	68	3.61	1.87	6	6	6.2	13	54	135.333	0.981848	3	2	1
400031	0	0	0	1	18.7	7	35	2.35	0.82	3.8	5	4.6	21	57	120	0.947195	1	4	0
403465	1	0	0	1	31.7	7	27	2.3	0.89	4.1	5.1	5.9	9	48	107.333	0.845742	1	2	0
400600	1	0	0	1	37.8	12	55	3.2	2.8	5.7	5.7	5.2	28	48	140.333	0.955149	1	11	1
407470	0	0	0	1	25.4	15	49	2.74	1.09	4.8	5.37	5.9	19.58	61.86	135.333	0.873786	1	2	0
406645	1	0	0	4	37.4	14	29	2.59	1.26	4.6	5.13	5.5	10.45	61.26	110	0.883929	1	5	0
402959	1	0	0	1	37.9	10	71	3.37	2.02	6.1	5.68	5.5	16.95	72.17	138	0.981928	1	1	1
411676	1	0	0	1	32.5	7	55	2.73	1.02	4.8	4.6	5.7	15	57	128.667	0.794606	1	1	0
405863	1	0	0	3	24.9	3	45	1.73	0.82	3.9	5	5	11	57	110	0.736842	1	10	0
405594	1	0	0	1	29.9	6	48	2.73	0.53	4.6	5.5	4.5	20	59	112.333	0.852632	1	2	0
401972	1	0	0	1	34.8	10	52	2.68	0.86	4.9	5.8	5.6	15	56	107.333	0.85282	1	3	0
400460	1	0	0	1	29.6	4	51	2.56	0.55	4.8	5.1	4.8	11	45	127.333	0.78341	1	1	0
410191	0	0	0	1	26	10	62	2.43	0.85	4.6	4.5	5.6	12	60	124.333	0.891922	1	3	0
406000	0	0	0	1	20.8	11	48	2.29	1.26	4.3	5.4	5.4	23	67	115.333	0.867347	1	4	0
402107	1	0	0	1	24.5	2	30	2.58	1.16	4.4	4.8	4.1	9	58	104	0.761047	1	1	0
411346	1	0	0	1	30.9	6	49	2.41	0.91	4.8	4.15	5.5	7.75	47.09	114.667	0.765609	1	2	0
403865	1	0	0	2	27.4	4	37	1.64	0.71	4	4.9	5	9	52	98	0.83871	1	2	0
404803	1	0	0	1	31.9	8	38	2.13	1.2	4.4	4.6	5.4	13	54	110	0.761905	1	3	0
403938	1	0	0	2	29.6	4	47	1.4	0.52	3.5	4.7	4.6	12	49	108.333	0.734043	1	3	0
402990	1	0	0	1	29.7	5	38	2.27	1.24	4.3	5.49	5	39.63	47.44	98.6667	0.762056	1	4	0
407530	1	0	0	1	30.5	6	62	2.5	1.26	4.7	5.99	6.4	12.05	62.03	119.667	0.855556	1	3	0
400452	0	1	0	1	14.1	4	27	2.94	0.75	5	4.7	4.7	32	82	126.333	0.854097	1	1	0
405846	1	0	0	2	22.9	2	28	1.73	1.38	3.8	4.9	5.2	10	62	98.3333	0.697917	1	1	0
402232	1	0	0	5	29.9	7	48	1.65	1.24	4.4	4.7	5.1	13	75	108	0.792089	1	5	0
411707	1	0	0	3	30.6	6	39	2.46	1.59	4.6	5.4	5.8	8	58	114.333	0.959897	1	4	0
400594	0	0	0	3	25.3	10	33	2.98	0.68	4.4	5.3	5.2	18	66	109.667	0.935007	1	4	0
406951	1	0	0	1	33.8	9	61	3.24	0.88	5.8	6	6	14	58	153.333	0.91	3	2	1
409514	1	0	0	1	37.1	8	64	2.93	0.89	5	6.2	6.4	20	57	121.333	0.848114	1	4	0
411790	1	0	0	1	23.8	2	37	2.39	0.86	4.5	4.4	5.2	14	70	95.6667	0.751278	1	0	0
408247	1	0	0	2	19.9	2	43	2.79	0.75	4.9	5.1	5.4	13	54	129.667	0.818713	1	10	0
409600	1	0	0	1	35.9	13	48	1.81	0.78	4.2	4.8	5.7	15	48	134.333	0.873674	1	3	0
400383	0	1	0	2	28.9	14	65	4.74	1.95	6.9	4.7	5.2	7	93	125.667	0.959287	3	3	1
402293	1	0	0	1	33.2	8	42	2.92	1.26	5	5.7	4.4	32	54	120.333	0.898558	1	2	0
411085	1	0	0	1	30.2	6	36	1.75	1.43	3.7	5.4	5.6	10	60	118.667	0.80052	1	3	0
408118	1	0	0	1	36	11	46	2.17	0.76	4.2	5.2	5.3	13	50	110	0.83	1	1	0
406713	1	0	0	1	27.8	4	46	1.94	0.67	3.9	4.8	5.4	14	52	101.667	0.793814	2	2	0
405206	1	0	0	1	20.4	1	26	1.97	1.09	4.3	5.1	4.8	12	57	104.667	0.756098	1	2	0
404563	1	0	0	1	30.4	4	30	1.97	1.31	4	4.5	5.3	13	52	96.6667	0.767677	1	1	0
411469	1	0	0	1	27.7	5	41	1.37	1.38	3.4	5.58	5.4	25.24	51.09	115.333	0.777836	1	0	0
409682	1	0	0	1	27.7	5	48	2.52	1.38	4.6	4.7	5.6	8	71	106	0.847864	1	4	0
404322	1	0	0	2	25.2	3	30	2.84	0.82	3.9	4.8	4.9	29	58	116.333	0.734043	1	0	0
407144	1	0	0	1	28.5	4	52	2.71	0.95	4.9	5.1	5.6	11	57	100.333	0.747253	1	2	0
402879	1	0	0	1	32	6	28	3.09	1.19	5.1	5.7	5.7	32	52	121	0.816922	1	0	0
403788	1	0	0	4	35.3	9	45	2.49	0.54	4.3	5.1	4.4	18	54	111	0.769231	2	2	0
405297	1	0	0	2	29.6	4	39	2.39	0.85	4.5	5.3	5.1	9	64	107	0.765957	1	5	0
408094	1	0	0	2	32.4	7	43	2.26	0.85	4.8	5.3	5.6	13	52	103.667	0.891514	1	2	0
405448	1	0	0	1	31.2	7	39	2.32	0.74	4.6	5.5	4.8	13	54	99.3333	0.824742	1	1	0
406503	1	0	0	2	25.3	3	48	2.17	0.61	4	4.6	5	8	47	119	0.865169	1	4	0
405555	1	0	0	1	34.6	10	46	1.96	0.83	4.5	5	4.5	9	57	101.667	0.865385	1	2	0
404948	0	0	0	3	21.6	7	45	4.56	1.77	7.4	5.6	5	19	99	120.667	0.844444	1	6	1
406165	0	1	1	1	11.8	3	52	2.59	1.02	4.5	5.7	5.9	12	70	112.667	0.857143	2	2	0
408119	0	1	0	4	17.5	7	49	2.15	0.5	4	6.1	5.2	13	59	102.667	0.833333	1	1	0
409784	0	2	0	1	22.4	10	71	1.51	0.85	3.1	5.6	6.8	12	70	118.333	0.845378	2	4	1
408220	0	1	0	1	27.6	11	54	2.5	0.71	4.3	4.7	6.1	30	57	135.667	0.894737	1	5	0
405017	0	1	1	3	17.9	6	22	2.41	0.79	4.3	4.6	4.9	12	84	138	0.8	1	3	0
403600	0	0	0	3	8.6	1	20	2.96	0.67	5	5	4.5	18	74	118.333	0.77381	1	2	0
408597	0	2	2	1	28.8	18	63	2.91	1.51	5.2	5.1	5.3	24	89	129	0.926663	2	2	1
402905	1	0	0	1	41.2	14	75	3.58	3.5	6.2	15	10.5	87.92	60.9	157.667	0.973429	1	3	1
408371	0	0	0	1	34.2	17	65	2.77	3.01	5.1	5.3	6.6	16	88	94.3333	0.995192	1	2	1
404428	1	0	0	3	35.1	9	40	3.29	0.75	4.7	5.1	5.2	13	59	124.333	0.816326	1	5	0
411523	1	0	0	1	43	16	74	2.89	1.95	5.6	5.1	5.9	21	57	147.667	1.08878	3	3	1
404145	0	2	0	1	26.5	14	60	2.72	1.84	4.1	9	7.1	36	65	126.333	0.949495	1	8	1
410693	0	0	1	1	23.7	13	66	2.84	1.26	5.1	5.1	5.3	11	68	120.333	1.00883	1	2	0
404532	1	0	0	1	38.2	12	63	3.64	1.76	6.3	7.2	6.4	15	46	141	0.92233	1	9	1
407024	1	0	0	1	32.2	5	68	2.37	1.37	4.8	5.3	6.1	11	69	121.333	0.876405	1	2	0
405671	1	0	0	1	35.8	9	78	2.33	1.24	5	5.5	5.5	11	61	155.333	0.867347	1	11	1
408213	0	2	0	4	31	18	67	1.9	2.03	3.7	9.4	6.8	32	53	116.333	1.16471	3	1	1
403830	1	0	0	2	44.2	10	49	2.97	0.87	4.9	5	5.2	13	60	123.333	0.764151	1	7	0
405548	1	0	0	1	38.9	15	63	3.22	2.04	5.5	5.4	5.5	13	53	143.333	0.863636	1	6	1
411695	1	0	0	1	28.1	4	60	2.89	1.04	4.7	4.5	5.7	16	55	113.333	0.742214	1	9	0
400331	1	0	0	1	36.2	8	54	2.4	0.84	4.8	6.1	5.3	19	47	134	0.880861	1	4	0
406488	1	0	0	1	31.5	8	66	2.53	0.75	4.9	5.6	4.8	23	59	132	0.857143	3	1	0
404041	1	0	0	1	37.3	10	41	2.95	1.05	4.1	5.5	4.7	18	43	135.667	0.90099	1	2	0
403717	1	0	0	1	26.6	4	46	1.99	0.91	3.5	4.7	4.9	190	48	106.667	0.873563	1	6	0
401589	1	0	0	3	33.7	9	67	1.9	1.07	3.8	5.2	5.6	16	61	114.333	0.914177	1	2	0
407176	1	0	0	1	41.1	17	53	2.24	1.2	4.6	4.7	5.9	11	51	110.667	1.01852	2	3	0
403665	1	0	0	1	41.4	15	72	2.59	5.09	7.2	5.6	5.4	14	48	163.333	0.899083	1	9	1
408376	1	0	0	1	39.8	11	67	2.75	3.08	5.2	5.5	6.2	17	57	137	0.907767	1	2	1
403431	0	2	0	1	31.3	22	69	3.35	1.45	5.9	4.7	6	12	96	143.667	1.09885	3	10	1
408253	1	0	0	2	32.6	8	65	2.71	3.89	5.3	9.2	7.9	47	64	159.333	0.944444	2	6	1
407867	1	0	0	2	22.2	2	27	1.98	0.65	3.9	5.1	5.5	5	51	108.333	0.763441	1	2	0
405182	0	0	0	4	25.3	12	20	2.51	0.43	4.2	5.1	4.8	13	73	127.333	0.896226	1	4	0
400705	1	0	0	1	37.4	9	72	3.71	2.3	5.6	4.9	5.4	11	67	160	0.8677	1	6	1
411000	1	0	0	1	41.1	14	64	2.64	1.26	4.9	5.5	5.6	14	68	130.667	0.964666	3	4	0
405045	0	0	0	1	26.9	12	64	1.63	1.45	4.6	5.5	5.1	25	87	131	0.878788	1	2	0
408505	0	2	2	1	31.9	19	69	3.74	1.66	6.1	5.5	5.5	29	99	158	1.01172	3	9	1
407644	1	0	0	1	36.1	11	61	4.26	1.5	7.6	6.1	6.1	12	53	121	0.916667	1	1	1
406725	1	0	0	3	33.4	9	34	2.66	0.78	4.8	4.7	5	8	43	124.667	0.884615	1	1	0
406706	1	0	0	1	32.7	8	50	2.5	0.48	4.9	5.6	5.8	10	43	133.333	0.82	1	3	0
402152	0	1	2	1	30.7	16	72	2.41	2.52	4.6	5	5.9	17	105	122.333	1.01671	2	7	1
407302	0	2	2	1	29	17	72	2.04	2.59	4	9.58	8.3	39.93	69.36	135.333	0.978723	1	2	1
403971	1	0	0	4	32.8	7	48	3.57	0.47	5.5	5.2	5.1	12	53	155	0.895238	3	5	1
401618	1	0	0	3	29.2	4	50	2.61	1.21	4.7	5.1	4.8	12	51	126.667	0.783651	1	6	0
411805	1	0	0	1	37.4	10	51	1.69	0.88	3.8	5.2	5.3	17	53	125.333	0.90005	1	5	1
403884	1	0	0	1	29.3	6	48	2.61	0.44	4.3	4.2	4.9	20	52	112	0.785714	1	2	0
406166	1	0	0	2	28.7	4	30	2.49	0.83	4.1	4.95	5.4	9.76	46.94	104	0.821053	1	2	0
410830	1	0	0	1	37.8	10	62	3.82	1.86	7.4	4.3	5.6	15	70	207.333	0.892172	3	3	1
405557	1	0	0	1	33.9	10	40	2.88	1.07	4.9	5.6	5.1	17	68	115.667	0.838095	1	1	0
409594	0	0	0	1	28.8	18	48	2.82	2.47	5.1	6.3	4.7	21	99	132.667	0.962125	1	1	1
404765	1	0	0	1	38.5	13	59	4.25	2.03	7.6	5.1	5.7	27	66	124	0.809524	2	3	1
408072	1	0	0	1	30.6	6	45	2.6	1.04	4.6	5.4	5.4	13	59	91.3333	0.828125	1	5	0
410550	1	0	0	1	39.3	5	60	0.98	0.9	3.2	4.9	6.1	31	46	138	0.875933	1	9	0
406832	1	0	0	1	27.4	2	29	2.43	0.64	4.8	5	5.1	16	56	103.333	0.791209	1	6	0
409985	1	0	0	3	33.5	11	32	2.29	1.04	4.1	4.7	5.4	23	59	115	0.947622	1	3	0
411266	1	0	0	2	28.2	4	49	2.81	1.03	4.9	5.8	6.1	13	49	122.333	0.863028	1	4	0
401339	1	0	0	2	40.4	10	60	3.6	1.25	4.7	6	5.3	15	55	130	0.900502	3	6	1
406976	0	0	1	3	25.9	12	20	2.69	0.69	4.7	6	4.8	10	74	131.667	0.806604	1	7	0
410678	1	0	0	1	37.4	10	69	2.26	1.38	4.7	4.6	6	10	62	131	1.01291	1	2	0
401195	1	0	0	1	20.1	7	38	2.02	0.86	3.1	5.8	4.7	23	44	125.667	0.677762	1	0	0
402815	0	0	0	2	23.6	8	26	2.11	1.62	4	5.1	4.5	13	73	114.667	0.830593	1	2	0
406988	0	1	0	1	24	10	77	1.33	1.96	4	5.8	5.5	105	63	148.333	0.873563	1	4	1
400734	1	0	0	1	41.8	19	68	4.99	3.86	7.2	5.4	6	20	63	140.333	0.975687	1	15	1
400558	1	0	0	3	30.2	6	47	2.67	0.7	4.8	4.5	5.3	15	51	117	0.841914	1	2	0
404899	0	1	1	1	18.3	8	27	2.13	0.63	3.9	5.4	5.3	17	76	119.333	0.88172	1	1	0
406490	1	0	0	1	32	6	53	4.17	2.37	7.4	6.6	6.2	18	55	151	0.89011	3	1	1
408227	1	0	0	1	35.4	10	57	3.64	1.49	5.7	5.2	5.8	48	50	112	0.838235	3	2	1
407358	1	0	0	1	21.7	3	45	1.73	1.13	4.3	5.11	5.7	11.2	56.05	118.667	0.755556	2	4	0
411628	1	0	1	1	29.8	6	32	2.23	0.85	4.3	5.44	5.3	16.17	61.64	100	0.794818	1	0	0
407858	1	0	0	1	35.4	3	32	1.71	1.38	3.7	5.2	5.5	9	62	126.333	0.722826	1	0	0
401414	1	0	0	3	32.9	8	44	2.91	0.89	4.3	6.3	5.5	24	56	126.333	0.880691	2	4	0
403562	0	1	0	1	21.7	7	52	2.91	0.91	4.6	5	5.1	16	80	130.333	0.782609	1	6	0
405616	1	0	0	2	26.5	2	27	2.88	0.9	5	4.46	5.1	50.84	51.16	97	0.885058	1	3	0
406451	1	0	0	3	32.2	6	35	2.34	1.09	4.7	5	5.4	12	46	122	0.826531	1	3	0
405220	1	0	0	1	37.1	9	50	2.88	0.85	5	6.2	5.8	18	49	106.667	0.798077	1	5	0
406363	0	0	1	2	23.6	8	30	2.93	0.99	5	5.4	5.1	10	85	118	0.831683	1	4	0
407064	0	1	1	1	16.6	3	32	2.28	1.1	4.6	5.6	5.4	12	76	119.667	0.863636	1	3	0
407856	1	0	0	1	31.9	6	36	2.76	0.61	4.8	4.7	5.3	14	48	108.667	0.842105	1	3	0
401177	1	0	0	2	29.7	4	26	2.79	0.91	3.6	5.1	5.1	15	59	106.667	0.852016	1	2	0
406659	0	0	1	1	24.1	4	44	2.55	0.59	4.7	5.5	5.1	32	75	107.667	0.824176	1	7	0
404949	1	0	0	2	17.9	1	18	1.6	0.63	3.2	4.8	5.1	9	57	96.6667	0.747126	1	2	0
403874	1	0	0	1	30.6	6	47	2.66	1.02	4.8	5.5	5.1	10	39	125.667	0.79798	1	2	0
402487	1	0	0	1	22.6	2	26	2.46	1.3	5	5.46	5.3	8.69	56.58	107.667	0.730552	3	3	0
410516	0	0	1	3	29	13	52	3.64	3.64	7.2	8.1	7.2	26	77	113	0.89957	1	5	1
410814	1	0	0	4	35.8	7	66	2.19	0.72	4.4	4.3	5.2	12	59	96.3333	0.971572	1	2	0
405170	0	1	0	1	9.3	3	19	1.99	1.24	3.8	5	4.9	14	76	123.333	0.80791	1	3	0
404965	1	0	0	1	27.1	5	48	2.23	0.95	4.4	4.5	4.8	11	49	111.667	0.791667	1	2	0
404176	1	0	0	4	31.8	4	46	3.12	1.08	4.6	5	4.9	12	55	117.333	0.852273	1	4	0
408212	1	0	0	2	38.8	14	68	2.46	1.85	4.6	5.2	6.1	58	67	122	0.918367	1	5	1
407527	1	0	0	1	29.8	5	51	2.5	1.25	4.8	5.15	5.5	11.87	40.86	101	0.832432	1	8	0
404902	0	0	0	1	23.5	9	25	2.74	0.97	5	5.1	5.2	77	79	136.333	0.831776	1	1	0
407273	1	0	0	4	34.7	8	45	2.21	1.24	4.6	4.8	5.3	7	48	125.667	0.796117	1	3	1
402185	1	0	0	2	33.2	8	50	1.8	0.79	3.9	5.3	5.2	10	67	130.667	0.888274	1	1	0
404338	0	0	0	5	25.1	8	50	3.38	1.38	4.6	5	5.5	13	63	119.333	0.892473	1	3	0
410577	0	0	0	1	25.7	11	62	1.76	1.3	3.9	5.7	6.2	36	73	156.333	0.869867	3	5	1
407887	1	0	0	1	31.4	5	33	2.46	1.07	5.1	5.8	5.4	23	64	109.333	0.868132	1	5	0
405296	0	1	0	1	15.2	4	40	2.79	0.84	4.6	4.5	5	13	68	107.667	0.851852	1	3	0
407816	1	0	0	4	28.6	3	29	1.39	0.72	3	5	5.8	20	45	100	0.757895	1	3	0
400765	1	0	0	2	26.1	3	39	2.16	0.88	3.3	5.4	4.7	13	68	96	0.748252	1	3	0
405127	1	0	0	2	33.8	7	32	2.23	0.93	4	4.4	4.9	16	59	102.333	0.773585	1	2	0
409509	1	0	0	1	15.3	3	47	2.41	0.7	4.7	6.2	5.3	15	54	106	0.719334	1	10	0
405268	1	0	0	1	28.7	4	33	1.27	0.56	2.9	5.7	4.6	17	57	103	0.734694	3	0	0
409917	1	0	0	2	21.7	2	40	2.25	0.81	4.5	4.48	5.2	15.59	54.84	100.333	0.696882	1	1	0
406313	1	0	0	1	29.2	4	41	1.93	0.81	4.1	5.1	5.5	14	60	99.3333	0.793478	1	5	0
403995	1	0	0	4	15.7	1	22	1.9	0.87	4.1	4.7	4.7	8	48	102	0.738095	2	5	0
401759	1	0	0	3	42.4	21	79	3.58	3.1	6.8	9.7	7	22	58	167.667	0.941579	1	14	1
402505	0	2	0	1	23.9	16	63	3.02	2.24	5.6	6.3	6.5	17	50	117.333	0.966947	1	3	1
410305	1	0	0	1	41.7	13	64	3.58	1.53	6.4	7.3	6.6	14	64	149.667	0.908605	3	1	1
410415	1	0	0	1	43.4	27	65	2.77	2.54	5.1	5.1	6.4	13	49	160.333	0.982039	1	4	1
407183	1	0	0	1	34.9	10	55	2.78	1.36	4.9	4.8	5.8	6	45	97.3333	0.833333	1	0	0
403916	1	0	0	1	44.4	24	71	4.24	1.62	6.2	6.1	5.9	17	62	170	1.0198	3	2	1
411615	0	1	0	2	24.2	10	63	2.17	0.61	3.9	5.1	6	13.06	67.72	115	0.893834	1	2	0
407635	1	0	0	1	44.4	21	67	2.99	3.35	5.8	6.1	6.2	28	56	142.333	0.981308	1	8	1
407697	0	2	2	1	26.8	14	57	2.91	1.24	4.8	5.2	5.7	15	69	131	0.9375	1	5	1
405928	1	0	0	1	33.5	9	58	2.81	0.84	5.5	5.5	5.6	32	60	106.333	0.843137	1	4	1
404490	1	0	0	1	40.2	15	61	3.97	0.82	5.1	5.3	4.9	14	55	149.667	0.877359	1	8	1
409972	1	0	0	1	40.5	20	57	2.9	2.76	5.5	5.61	5.8	20.1	73.06	116	0.908428	1	2	1
405602	1	0	0	1	29.6	5	50	1.69	0.94	4	5.3	5.4	10	55	120.667	0.7	2	2	0
411536	0	0	1	2	29.2	13	65	2.25	1.24	4.3	4.7	5.8	16	61	129.667	0.926492	1	11	0
411008	1	0	0	3	28.7	4	41	1.88	0.92	4.3	5	6	58	51	114	0.768164	1	7	0
411825	1	0	0	1	34	7	60	3.28	1.74	5.4	6.6	5.5	22	54	108	0.869093	2	13	1
409745	1	0	0	2	25.1	3	27	2.51	0.64	4.4	5.5	5.7	17	65	98	0.76002	1	1	0
407758	1	0	0	1	41.9	20	64	3.96	0.77	6.4	7.5	6.5	28	53	152.667	0.939252	2	7	1
402791	1	0	0	2	38.2	8	68	2.09	0.94	4.1	5.27	5.6	12.24	66.38	135	0.90571	1	5	0
408349	1	0	0	1	26.5	6	47	2.91	0.88	4.9	4.8	5.4	8	45	98.6667	0.8	3	2	0
406629	1	0	0	1	37.9	12	53	2.58	1.86	4.5	5.66	5.5	17.94	51.88	146.333	0.96875	1	3	1
402234	1	0	0	2	34.6	10	29	2.35	0.99	4.1	4.7	5	11	68	93.6667	0.883524	1	3	0
400138	1	0	0	1	37.3	10	47	3.42	1.28	5.1	5.8	4.7	10	47	150	0.961905	1	4	1
400853	0	1	1	1	18.7	6	29	2.54	0.76	3.5	5.3	5.4	16	61	110.333	0.851852	1	5	0
404554	1	0	0	1	41.4	16	63	4.39	2.04	7.2	5.2	5.1	17	42	149.333	0.930693	3	4	1
400197	0	0	0	1	30.7	13	84	4.53	1.98	7.1	5.8	5	22	87	156.333	0.933095	1	11	1
402267	1	0	0	1	34.7	8	39	2.19	0.74	4	4.9	4	15	60	108.333	0.930173	1	2	0
405748	0	1	0	1	24.6	13	49	2.42	0.81	4.4	5.1	5.2	12	72	117	0.872549	1	2	0
406544	1	0	0	1	36	8	69	3.85	0.75	6	5.4	5.7	13	62	170.667	1.06977	1	1	1
409717	1	0	0	1	39.1	12	54	2.85	0.91	5	5.8	5.6	27	50	124.333	0.911925	3	2	0
411521	1	0	0	2	29.3	5	47	2.52	0.99	5.1	4.9	5.3	12	49	118	0.716102	1	5	0
406194	1	0	0	1	32.5	5	38	2	0.67	3.8	4.5	5.5	16	49	119.333	0.77	1	2	0
406080	0	0	0	1	25.1	11	64	0.66	0.41	2.2	5.7	6.2	42	91	114	0.946237	1	2	0
411294	0	2	2	1	21.9	5	59	1.74	0.81	3.9	5.17	5.8	18.73	59.96	117.667	0.912763	3	5	1
411496	1	0	0	1	41.2	19	67	2.45	1.96	4.3	6.3	6	20	52	130.667	0.983744	3	6	1
411050	1	0	0	1	41.6	21	65	2.57	1.78	4.5	5.4	5.6	16	60	132	0.931656	2	9	1
405941	1	0	0	1	34	7	66	3.31	1.77	6.3	5.3	5.1	22	55	108.667	0.896739	1	8	1
402756	0	1	1	2	28.9	18	37	2.98	0.84	5	6.6	5.7	21	89	105.667	0.959059	1	2	0
402504	0	0	1	1	26.3	14	54	3.94	1.24	6.6	5.2	6.1	19	73	136.333	0.847685	1	5	1
401064	0	2	1	1	31.3	23	35	2.24	1.44	4	14.5	7.9	119	62	141	1.02851	3	1	1
403746	1	0	0	1	30.4	5	52	2.36	0.95	4.6	6.2	5.4	16	41	115.667	0.791667	1	5	0
411519	0	0	1	1	26.3	13	44	1.95	1.18	3.8	4.45	5.2	25.24	62.03	126.667	0.937297	1	5	0
411208	1	0	0	1	32.5	7	45	2.22	1.04	4.2	5.2	5.7	12	54	120.333	0.909891	1	7	0
404209	0	0	0	2	25.8	11	38	3.28	0.62	4.5	5.9	4.8	34	73	110	0.888889	1	3	0
405371	1	0	0	1	32.1	9	48	2.83	1.31	4.7	4.9	5.6	12	55	138.333	0.861386	1	1	0
403276	1	0	0	1	36.9	9	54	3.6	4.54	7.1	4.7	5.5	22	65	157	0.903337	1	10	1
410905	0	2	0	1	32	8	76	3.8	1.66	6.1	5.2	5.7	39	81	121	0.85971	3	6	1
405947	1	0	0	1	32.2	7	58	3.76	0.75	6.2	4.7	5.4	26	56	122	0.964103	1	9	1
408343	0	1	1	1	26.8	13	67	3.22	1.98	5.2	4.6	6	13	76	156	0.947917	2	2	1
410348	1	0	0	1	35	9	58	2.66	1.65	4.8	4.8	4.8	18	58	125	0.970983	1	10	0
407792	1	0	0	1	35.9	8	67	3.02	1.8	5.5	5.4	6	13	48	114.333	0.969697	3	7	1
408291	1	0	0	1	34.6	8	61	2.55	0.97	4.9	5.4	5.9	11	55	106.667	0.814433	1	2	0
401575	0	0	1	1	21.3	7	53	2.14	1.05	4.6	5.2	5.1	21	72	117.667	0.869736	1	2	0
405973	1	0	0	4	29.4	7	53	2.03	1.44	4.3	4.8	4.8	12	51	101.667	0.863158	1	6	0
410379	0	0	1	2	22.2	12	38	2.46	1.16	4.9	5	5.3	20	75	125.667	0.910634	1	3	0
402002	0	2	2	1	28.2	19	69	2.19	0.92	4.1	7.1	7.5	16	71	138	0.932407	1	2	1
400935	1	0	0	2	20.6	2	28	1.7	0.44	3.6	5.2	5.3	11	52	124.333	0.763692	1	4	0
411099	1	0	0	3	25.7	2	31	1.64	0.94	3.3	4.4	5.4	9	59	101.333	0.772499	1	5	0
404614	1	0	0	1	27.8	6	44	1.34	0.76	3.4	5.1	4.6	16	61	102.667	0.715789	1	2	0
403548	0	1	0	3	19.7	9	46	2.6	1	4.3	5.3	5.1	19	66	116.333	0.84375	1	1	0
405510	1	0	0	1	34.3	9	54	2.79	1.54	5.1	5.5	5.4	36	59	132.333	0.826923	1	1	0
401322	1	0	0	2	31.3	4	41	2.56	0.55	4.3	5.5	5.9	15	51	131	0.769147	1	0	0
411181	1	0	0	1	34.1	5	72	4.52	1.11	6.8	5.1	6	23	65	140.667	0.951069	1	3	1
403849	1	0	0	1	29.7	5	47	2.15	0.5	4.2	4.1	4.8	10	61	106	0.826531	1	8	0
407954	1	0	0	1	41.6	16	50	2.62	0.96	4.7	5.7	5.7	18	51	99.3333	0.807018	1	1	0
402878	1	0	0	1	25.1	5	39	1.99	0.58	3.8	5.2	5.1	21	61	122.333	0.801041	1	5	0
408099	1	0	0	1	23.4	2	31	2.36	1.21	4.8	4.9	5.6	10	56	101	0.755814	1	0	0
411607	1	0	0	4	32.2	8	41	2.51	1.04	4.5	4.85	5.8	10.46	48.95	121.333	0.863116	1	2	0
406848	1	0	0	2	27.2	4	32	2.98	0.82	4.9	4.8	5.4	9	62	105.333	0.836735	1	6	0
406730	0	2	0	1	7.9	3	21	1.53	0.59	3.5	5.9	5.2	12	68	118	0.731183	1	5	0
403563	1	0	0	4	31.2	5	45	2.61	1.35	4.6	4.6	4.8	11	60	114.667	0.72449	2	1	0
405889	1	0	0	1	33.5	7	74	1.94	4.24	4.6	5.5	5.7	20	69	136	0.921569	2	3	1
400501	1	0	0	2	30.1	5	36	2.33	0.63	4.6	4	4.9	17	67	98.6667	0.772704	1	2	0
405850	1	0	0	1	34.1	5	77	3.03	1.47	5.9	5.6	6.2	21	92	123	0.88172	2	8	1
403068	1	0	0	1	32.2	6	23	2.51	0.73	4.5	4.7	5.2	23	54	105.333	0.808256	1	2	0
402205	1	0	0	1	36.4	3	60	2.23	0.64	4.8	4.8	5.6	11	54	100.333	0.79593	1	0	0
405746	1	0	0	1	19.4	1	19	2.43	0.74	4.8	5.02	4.7	10.05	53.18	104.333	0.72093	1	4	0
404377	0	1	1	2	19.6	4	34	2.8	0.99	4.2	4.8	5.1	12	62	109.667	0.795699	2	5	0
402247	1	0	0	1	28.9	6	46	2.32	1.02	4.4	5.6	5.7	10	57	109.333	0.833801	1	5	0
405187	1	0	0	3	23	1	20	2.5	0.92	4.8	4.6	4.8	11	58	106.667	0.757396	1	4	0
405957	1	0	0	4	23.6	2	43	2.46	0.78	5.1	4.2	5.6	15	54	97.3333	0.758242	1	8	0
404231	0	1	1	2	29.6	15	34	3.7	2.31	4.9	6.2	5.2	26	63	109.667	0.897196	3	5	1
402875	1	0	0	1	26.1	4	33	1.52	0.65	3.6	5.2	5.2	12	56	101.667	0.858285	1	2	0
410778	1	0	0	2	33.2	8	38	2.07	0.63	3.8	4.8	5.7	11	44	93	0.808047	1	1	0
407551	1	0	0	3	25.9	3	28	2.55	0.83	4.9	5.8	5.6	24	52	116.333	0.811111	1	3	0
401023	1	0	0	2	27.4	4	37	2.02	1.17	4.8	4.9	4.8	13	62	116.333	0.795145	2	4	0
404596	0	1	1	3	20.2	8	33	2.51	1.19	4.8	5.3	4.8	21	76	122.333	0.867347	1	6	0
411495	0	2	0	1	35.3	22	72	2.36	1.31	4.2	5.7	5.6	43	65	115	0.989242	2	3	1
406082	0	0	0	2	13.4	3	37	2.53	0.75	4.8	5.3	5.6	35	78	102.333	0.728261	1	3	0
406434	1	0	0	4	27.9	2	54	2.89	0.74	5.2	6.3	5.1	20	84	112.333	0.744444	1	1	1
406801	0	0	0	2	11.6	1	21	2.18	1.3	4.2	5.1	5.5	12	79	119.333	0.811765	1	1	0
406459	1	0	0	4	32.1	6	34	2.35	1.6	4.3	5.5	5.4	13	57	104.333	0.802083	1	6	0
407876	1	0	0	3	27.1	3	25	1.41	0.64	4	5.4	5.6	13	45	103.667	0.741935	1	2	0
407534	1	0	0	1	33.9	8	43	2.61	0.55	4.6	4.62	6.2	13.94	66.87	123.333	0.805825	1	2	0
406648	1	0	0	1	31.5	8	38	2.17	0.44	3.9	5.6	5.4	14	62	106.667	0.85	1	2	0
410028	1	0	0	2	31.7	7	35	2.44	0.89	4.4	5.29	5.8	10.12	46.79	105.667	0.83773	1	3	0
406890	1	0	0	1	23	1	28	2.12	0.71	4.5	4.7	5	13	51	97.3333	0.725275	1	0	0
405891	0	1	0	1	17.1	7	65	2.65	0.59	4.6	4.5	5.3	23	76	115.333	0.837838	1	5	0
405089	0	0	0	2	14.5	1	22	1.13	0.89	2.9	4.8	5.2	14	76	134.667	0.755814	1	1	0
405031	0	2	0	1	31	20	67	1.46	1.07	3.4	8.2	7	13	65	158	0.926605	3	7	1
406161	0	1	0	4	30.1	21	69	2.68	1.86	4.9	6.3	5.9	22	65	148	1	1	9	1
411259	1	0	0	2	36.3	6	54	2.95	1.47	5	5.2	6.2	23	54	126.667	0.855727	1	3	0
405355	1	0	0	1	35.3	11	43	2.89	1.09	5.1	5.2	5.5	18	69	138	0.920188	1	2	0
401756	1	0	0	2	30.1	5	49	2.09	1.65	4.5	5.8	4.9	21	57	107	0.813036	1	5	0
407402	0	0	0	1	16.4	9	72	2.2	0.59	4.4	5.88	5.9	18.93	73.15	117.667	0.835051	2	1	0
406019	1	0	0	1	34.4	7	58	2.43	1.23	4.7	4.9	5.7	19	49	129.667	0.871795	3	8	1
405823	0	2	1	3	17.3	8	54	3.03	1.17	5.8	4.9	5.4	16	75	127.333	0.863636	1	8	1
407529	1	0	0	1	39.3	12	62	2.86	0.63	5	6.3	6.4	23.84	49.66	132	0.918782	1	2	0
403689	1	0	0	4	34.6	8	35	2.15	0.85	3.7	5.2	5.2	11	52	103.667	0.807692	1	3	0
411766	1	0	0	1	40.7	10	75	7.03	2.12	10.4	5.1	5.8	11	60	151.667	0.833165	3	6	1
406696	0	1	0	1	30.3	15	54	3.22	1.81	5.1	5.2	5.1	27	65	159.667	1.05102	1	2	1
401620	1	0	0	1	37	10	72	4	1.63	7.1	4.8	4.8	14	73	130.667	0.858052	3	11	1
407583	1	0	0	1	39.1	10	67	3.7	2.25	6.4	6.4	6.5	15	56	188.333	0.851485	3	12	1
403541	1	0	1	3	19.6	1	27	1.97	0.71	4.2	5	4.7	12	51	107.667	0.72619	1	7	0
409932	1	0	0	1	36.3	11	44	2.2	0.84	4.1	5.69	5.8	29.55	41.37	116	0.900198	1	4	0
405818	1	0	0	1	33.1	3	71	3.17	1.15	5.6	5.5	5	7	62	125.333	0.939024	1	7	1
404663	1	0	1	1	26.9	3	29	1.8	0.89	3.8	5	4.6	10	55	102.667	0.782609	1	4	0
403452	0	1	1	1	13.4	5	47	2.33	0.61	4.7	6.4	5.9	15	68	111.667	0.88487	1	8	0
402221	1	0	0	1	27.4	4	51	1.89	0.74	3.7	6.2	5.4	24	60	106.667	0.83443	1	5	1
403847	0	2	1	1	26.6	18	51	2.7	1.34	4.4	6.1	5.2	23	61	135	0.924528	1	1	0
400916	1	0	0	1	33.4	7	58	3.62	1.13	6	5.4	5.2	16	50	132.667	0.923161	2	5	1
411552	1	0	0	1	35.5	10	50	2.83	1.2	4.7	5	6	15	56	111	0.844149	1	1	0
401334	1	0	0	1	41.8	19	54	3.45	1.32	5.1	6.3	6	15	58	133.667	0.880819	1	5	1
409597	0	0	1	2	24	12	45	2.95	1.58	5.4	5.6	6	24	65	118.667	0.925851	1	4	1
403890	0	0	1	5	22.5	6	32	2.85	0.94	5	5.1	4.9	15	75	130	0.842105	1	4	0
408277	1	0	0	1	40	16	68	3.64	1.6	5.6	5.6	7	12	73	133	0.95098	1	6	1
405142	0	1	1	2	13.4	3	31	2.48	1.59	4.4	5.3	5.3	8	71	120.667	0.816092	1	2	0
409511	1	0	0	1	29.4	5	45	2.09	0.77	3.9	5.4	5.6	6	48	112.333	0.871482	2	1	0
406837	1	0	0	1	24.6	4	29	2.42	0.8	4.3	5	5.1	10	57	107	0.790055	1	1	0
408042	1	0	0	3	25.2	3	36	2.7	0.78	4.6	4.8	5.7	31	46	117	0.826087	1	3	0
411610	1	0	0	1	33.8	9	53	2.23	1.3	4.1	4.82	5.6	14.73	63.41	111.667	0.811448	1	1	0
410029	0	0	0	1	28.2	16	72	2.01	1.07	3.8	8.39	7.9	19.68	57.16	166	1.03328	3	2	1
406432	1	0	0	1	34.3	9	34	2.03	1.54	4.4	4.9	4.9	10	54	113.333	0.834951	1	2	0
400616	1	0	0	4	30.9	6	50	2.79	0.57	4.7	4.9	5.3	12	52	119.333	0.764877	1	7	0
403120	0	1	0	1	25.7	5	72	1.99	0.68	3.7	5.4	5.3	8	62	122.667	0.784143	2	1	0
411616	0	1	1	1	16.8	8	51	2.7	1.53	4.7	5.2	5.4	25.74	78.1	105.667	0.772847	1	0	0
407396	0	1	1	1	26.8	13	48	2.48	1.04	4.8	5.1	5.3	67	71	135	0.989583	1	4	0
407450	1	0	0	1	29.1	3	33	2.76	1.11	4.8	4.87	5.7	9.41	46.98	114	0.78022	1	0	0
405210	1	0	0	1	32.6	6	66	2.27	1.1	4.4	5	5.4	11	68	123	0.83871	1	3	0
411826	1	0	0	2	33.6	10	41	2.92	1.08	4.9	4.9	5.8	10	51	117.667	0.876249	1	7	1
402309	0	1	1	4	18.9	5	31	2.92	0.97	5.1	5.9	4.2	13	100	101.667	0.841052	1	7	0
405950	0	2	1	1	27.4	18	64	2.15	1.72	4.2	4.5	5.4	18	73	141.333	0.812785	1	1	1
410017	1	0	0	4	42.7	20	53	2.24	0.8	4.5	7.4	6.8	22.26	42.51	149.667	0.898007	1	10	1
407749	0	0	0	2	33.9	19	67	2.68	0.83	4.7	5.6	5.9	14	77	147	0.916667	1	7	1
410060	1	0	0	1	36.3	11	50	2.05	1	4.1	5.1	5.7	22	52	112	0.834055	1	1	0
411564	1	0	0	1	38.8	13	49	2.75	1.2	4.7	4.9	5.5	11	63	110.667	0.864865	1	2	0
407996	0	0	0	1	12.2	4	36	1.99	1.08	4.2	5.3	5.8	25	74	117	0.831461	2	2	0
402851	1	0	0	2	30.6	5	39	2.48	1.09	4.8	6.3	6	18	70	109.667	0.833589	1	0	0
403873	1	0	0	1	32	4	47	2.42	1.65	4.6	5.2	5.1	14	61	104.333	0.852632	1	2	0
408534	1	0	0	1	34.2	12	42	1.83	1.41	4	6.2	5.8	18	48	112.333	0.942068	1	5	0
408560	1	0	0	2	23.4	3	39	1.4	1.08	3.6	4.9	5	14	45	97	0.740618	1	4	0
404019	0	2	0	1	34.6	17	71	3.47	1.19	4.6	5.6	4.4	76	114	116.333	0.893204	3	2	1
405162	0	0	1	3	21.6	11	38	1.63	0.84	3.1	5.6	5.3	17	89	128.667	0.864078	1	2	0
405993	1	0	0	1	27	5	49	1.99	1.1	4.2	5.2	5.4	15	59	104.333	0.868132	1	5	0
406727	1	0	0	3	27.7	4	46	1.68	0.54	4.4	5.1	5.2	11	53	125.333	0.78022	1	3	0
403328	1	0	0	2	33.1	6	44	1.99	0.85	4.2	5.5	5.9	15	52	109.667	0.892121	1	0	0
404502	1	0	0	1	34.5	8	47	3.16	1.08	4.3	5.4	5.3	15	52	107.667	0.843137	1	6	0
411245	1	0	0	1	38.1	13	42	2.86	0.89	4.6	4.9	6.2	22	57	119.667	0.96837	1	0	0
404560	0	0	0	1	20.4	9	33	2.29	1.3	4.2	5.1	4.8	11	82	123.667	0.843137	1	5	0
402440	1	0	0	1	29.9	3	45	2.19	0.83	3.9	5.1	5.4	17	57	112	0.849284	1	4	0
406062	0	1	1	1	21.5	9	57	2.02	0.74	3.8	5.85	5.7	16.07	70.46	132.667	0.87234	1	2	0
410993	1	0	0	4	29.2	6	54	2.09	0.78	3.7	5.9	6.3	20	55	126	0.809144	1	2	0
403413	0	1	2	1	20.7	13	67	2.24	0.88	4.1	5.9	5.7	13	80	118.333	0.910285	3	1	1
410599	1	0	0	4	35.8	9	45	2.38	0.68	4.5	4.94	6.4	17.47	62.66	114.333	0.920732	1	3	0
407290	1	0	0	1	24.4	3	57	2.79	1.08	5.1	5.4	6	17	61	115.333	0.724324	3	0	0
408060	1	0	0	1	27	4	44	2.13	0.89	4.1	4.9	5.2	12	54	128.667	0.8	1	2	0
402537	1	0	0	3	36.1	9	49	2.81	1.43	5.1	5.3	5.6	17	48	120.667	0.879205	1	0	0
400976	1	0	0	4	33.4	6	36	2.9	0.69	5.1	5.39	5.3	11.15	52.68	101	0.829281	1	0	0
408403	1	0	0	1	21.1	2	36	2.01	0.78	4.7	4.95	5.4	22.68	65.92	111.333	0.736264	1	3	0
407327	0	0	0	1	33.8	18	52	1.89	1.55	3.8	5.4	6.5	43	90	130.333	0.942308	1	7	1
411714	1	0	0	1	38.6	13	62	3.17	1.75	5.8	7	8.5	18	42	121.667	0.922222	1	4	1
404591	0	1	1	1	25	11	59	2.94	0.65	5.3	6	5.2	15	61	141.667	0.877551	1	1	1
403929	1	0	0	2	28.7	2	47	2.61	0.69	4.8	5.9	5.4	12	50	122.667	0.758621	1	1	0
408587	1	0	0	2	23.6	3	46	2.41	0.68	5.1	5.1	5.4	16	58	96	0.673696	1	1	0
404710	1	0	0	3	25.9	3	27	1.64	0.7	3.9	4.9	4.8	9	58	95.6667	0.835165	1	1	0
411124	1	0	0	1	30.4	4	58	2.75	1.84	4.8	4.7	6.2	9	44	134.333	0.800114	1	0	1
409882	1	0	0	1	39.1	9	75	2.68	2.59	5.6	5.63	6.3	20.18	60.43	139.667	1.06187	3	4	1
409645	1	0	0	1	33.9	8	56	2.55	0.95	4.7	5	5.9	8	68	116	0.831688	1	3	0
404703	0	1	0	1	21.7	9	61	2.08	0.67	4.5	5.9	5.4	20	55	112	0.924731	1	2	0
407976	1	0	0	3	14.4	6	42	2.19	0.59	4.3	5	6	16	56	114	0.755102	1	4	0
408209	1	0	0	3	29.1	4	37	2.57	0.82	4.6	4.7	5.6	32	59	109.667	0.776596	1	6	0
405154	1	0	0	3	20.6	1	20	1.27	0.68	3.5	4.4	5.2	7	51	104.333	0.712575	1	3	0
405418	1	0	0	1	29.8	5	53	2.55	0.69	4.4	5.1	4.9	15	69	116.667	0.802198	1	3	0
404437	1	0	0	1	27.9	2	25	3.24	0.64	4.8	4.2	5	58	52	109.333	0.734694	1	2	0
409650	1	0	0	1	32.6	8	43	2.83	1.34	5.1	4.5	5.4	12	60	127.667	0.8001	1	11	0
406661	0	1	1	2	20.1	4	29	2.82	1.02	5	5.1	5.2	6	63	109	0.860465	1	0	0
407755	1	0	0	1	34.6	9	61	3.11	0.87	6.3	4.1	5.6	20	53	101.667	0.79	2	6	1
410987	1	0	0	2	25.4	3	38	1.79	0.91	4.2	4.9	5.6	18	65	114	0.731359	1	4	0
402094	1	0	0	1	27.8	4	27	2.81	1.22	5.1	4.7	3.7	26	62	120.667	0.748031	1	7	0
406504	1	0	0	2	23	2	33	2.56	0.99	4.9	4.95	5.2	16.32	53.86	98	0.738636	1	0	0
405615	1	0	0	1	23.7	2	37	1.83	0.6	4.5	4.96	5.1	30.13	52.73	106.333	0.744681	1	0	0
404438	1	0	0	3	34.2	7	40	3.05	1.06	4.5	4.9	5	9	44	123.667	0.841584	1	1	0
405255	0	2	0	1	28	11	70	2.82	1.06	5.1	5.5	5.1	25	69	125.333	0.938144	2	1	0
411239	0	1	1	5	24	9	65	2.9	1.3	5	5.7	6.2	15	54	106.667	0.875703	1	3	0
400294	1	0	0	4	36.2	9	67	2.56	2.55	5.2	9.5	9.4	16	37	128	0.938775	1	8	1
405741	1	0	0	3	31.7	6	30	2.1	1.17	4	4.8	5	19	54	106.667	0.80198	1	2	0
403083	1	0	0	1	38.7	12	67	2.49	0.76	4.7	5.1	5.7	9	64	138.667	1.00877	1	3	0
403487	0	1	1	4	29.3	12	57	3.47	1.57	6.1	6.1	6	14	80	130	0.967496	1	4	1
406264	1	0	0	2	29.5	4	44	1.83	0.47	4.2	5.1	5.6	7	44	117	0.715789	1	4	0
402431	1	0	0	1	40.8	15	72	4.83	1.57	8.3	7.5	6.6	16	56	149	0.891691	2	8	1
408210	0	1	0	1	31.6	17	47	2.99	0.87	4.7	5.2	5.8	45	66	127	0.875622	1	2	0
407703	0	1	0	1	32	18	68	3.5	1.61	5.4	5.2	6	9	115	122.333	0.949495	3	7	1
406701	1	0	0	1	32.1	4	64	1.92	0.92	4.3	5.2	5.3	16	52	121.667	0.823529	1	3	0
400573	1	0	0	1	39.2	13	69	5.56	1.17	8	6.7	6.5	16	48	130	0.870379	2	4	1
409851	1	0	0	1	31.5	6	51	2.57	5.41	5.6	5.83	5.7	12.89	50.14	104	0.993151	1	3	1
406010	0	2	1	1	32.6	29	66	1.86	0.87	3.6	5.6	5.6	15	72	137.333	0.978166	1	1	1
410989	0	0	1	1	25.2	9	62	2.93	1.27	5.1	5	5.7	15	60	147.333	0.88798	1	9	1
404854	1	0	0	2	31.6	6	27	2.55	0.91	4.6	4.3	5.1	33	68	121.667	0.864078	1	4	0
402172	1	0	0	1	40	13	72	3.2	2.09	5.5	11.8	8.6	15	60	161.333	0.952016	2	2	1
408293	1	0	0	1	36.6	12	61	3.02	1.94	5.7	7.4	7.4	16	64	129	0.939394	1	1	1
404922	0	1	1	4	26.3	16	31	2.45	1.4	4.3	5.6	5.3	24	66	123.333	0.862385	1	3	0
400318	1	0	0	1	38.2	10	64	3.09	1.47	5.4	5.1	5	15	53	120.667	0.857648	1	5	1
410817	1	0	0	1	37.8	12	55	2.35	1.41	5.1	4.9	5.5	35	48	129.333	0.99672	1	3	0
406863	1	0	0	3	28.4	2	28	2.1	0.97	4.2	4.8	5.6	14	51	102	0.860465	1	6	0
404198	1	0	0	1	41.2	16	62	2.59	2.32	3.9	11.1	9	12	51	182.667	1.00971	1	4	1
405643	1	0	0	1	40.7	18	65	2.36	1.63	4.9	6.97	5.9	2.03	72.64	137.667	1.0099	1	2	0
404761	0	0	1	1	25.6	15	73	2.97	1.14	5.6	4.8	5.3	26	68	155.667	0.891089	2	5	1
405899	1	0	0	1	28.9	7	48	1.89	0.44	4.2	4.4	5.8	10	39	109.333	0.968586	2	3	0
404530	1	0	0	1	43.2	19	71	3.57	2.67	6.1	6.4	6.4	34	46	151.333	1	2	4	1
411195	1	0	0	2	39	13	69	2.79	1.66	4.9	5.4	6.3	16	46	139	0.93558	2	12	1
401506	1	0	0	4	36.7	11	66	2.89	1	5	6.8	5.9	12	60	124.667	0.895971	1	7	0
409655	1	0	0	3	36.2	10	48	3.05	1.63	5	4.8	5.4	17	46	115.333	1.0105	1	6	1
407750	1	0	0	1	36.6	9	52	3.4	1.34	6.4	5.5	5.7	16	60	152.667	0.817308	3	6	1
402159	1	0	0	1	30.7	6	44	2.61	1.57	5	5.1	5.5	45	56	113	0.845322	1	2	0
404985	1	0	0	1	31.7	7	43	2.29	1.47	4.6	5.2	4.9	7	52	109	0.872549	1	4	0
410124	0	1	1	1	24.8	14	66	3.44	1.88	5.7	5.4	5.4	17	85	134	0.990005	1	6	1
408121	1	0	0	1	31.5	8	64	2.82	1.59	5	6	5.5	8	49	125.667	0.885417	1	4	0
400761	0	2	2	1	31.6	19	72	3.37	1.19	4.4	6.1	6.4	14	68	130	0.944726	1	7	1
404197	1	0	0	1	30.1	3	31	3.11	0.81	4.5	5.7	4.6	12	48	120.667	0.868132	1	1	0
411499	1	0	1	5	35.7	9	45	2.15	1.08	3.9	5.3	5.2	10	51	109.333	0.990645	1	1	0
411725	1	0	0	1	30.7	7	45	2.26	1.53	4.3	4.2	5.3	11	55	137.333	0.802363	1	2	0
408382	1	0	0	1	31.9	7	44	2.18	0.83	4.5	4.9	5.3	13	55	122.333	0.772277	1	3	0
411438	1	0	0	1	35.4	6	67	2.16	0.86	4.5	5.07	5.6	48.43	54.71	118.333	0.976458	3	2	1
405013	1	0	0	1	30.1	7	44	2.28	0.55	4.1	5	5.2	13	50	134	0.916667	3	2	0
407449	1	0	0	1	36.1	11	66	3.28	1.42	5.8	5.76	6.9	9.48	74.85	126	0.95	1	6	1
408237	0	0	0	1	28.4	4	30	1.8	1.17	3.5	5.4	5.8	28	56	108.333	0.697917	1	1	0
409624	1	0	0	2	36.3	11	51	3.04	2.41	5.8	5	5.9	12	66	136.333	0.858236	1	6	1
407071	0	0	1	2	22.9	10	44	2.44	0.72	4.3	5	5.3	15	69	113	0.9375	1	4	0
400554	1	0	0	1	29.8	7	31	2.11	0.89	3.6	4.9	4.8	23	72	112.333	0.813093	1	1	0
410125	1	0	0	1	32.6	7	49	2.11	0.78	3.9	5.9	5.5	21	40	118	0.888468	1	5	0
410818	1	0	0	5	38.7	15	65	3.19	0.97	5.1	6.2	6.8	17	61	123	0.987348	1	11	1
406526	1	0	0	1	26.6	2	39	1.74	1.05	3.8	5.3	5	32	48	99.6667	0.752809	1	6	0
403879	1	0	0	2	23.1	2	20	1.8	0.78	3.5	4.3	4.8	11	59	109	0.688889	1	3	0
406144	1	0	0	1	28.7	5	47	2.07	1.19	4.2	4.8	5.2	11	67	106.667	0.791209	1	2	0
404539	1	0	0	1	31.2	6	46	2.54	0.59	5.1	5	4.7	63	53	114.333	0.77	1	0	0
411285	1	0	0	1	36.8	7	62	3.67	2.7	7	4.47	5.6	22.87	62.88	133.667	0.913661	1	3	1
400929	1	0	0	1	29.6	6	52	2.49	1.55	4.9	5.2	6	22	61	124.333	0.842849	1	1	0
404442	1	0	0	2	35.4	11	51	4.28	3.05	5.7	4.8	5.5	18	50	158.667	0.872549	1	6	1
404735	1	0	0	4	30.8	5	49	1.64	0.68	4	4.4	4.8	14	62	119	0.791667	1	7	0
406902	1	0	0	1	37.6	11	64	3.33	1.21	5.8	6.1	5.9	23	45	132	0.94898	1	4	1
406613	1	0	0	1	31.5	4	20	1.62	1.09	3.9	4.9	5.5	8	60	103	0.747475	1	1	0
407911	0	2	2	1	26.6	12	58	1.71	1.64	3.4	11.4	9	25	109	134.667	0.882353	1	10	1
411531	0	0	0	1	25.3	13	66	2.89	0.74	4.9	6.3	6	19	67	128.333	0.917925	1	7	1
402849	1	0	0	2	27.7	3	39	1.46	0.72	3.4	4.7	4.7	33	59	99.3333	0.775962	1	4	0
405369	1	0	0	1	24.4	2	39	1.47	0.7	4.4	5.1	5.1	11	50	113.667	0.771739	1	4	0
405958	1	0	0	2	28.7	3	36	2.36	0.92	4.4	4.3	4.9	7	55	107.667	0.878307	1	2	0
407057	1	0	0	1	42.5	21	68	3.46	1.6	5.8	5.6	6.2	13	51	184	1.01887	2	6	1
405668	1	0	0	4	30.8	7	29	2.94	1.6	4.9	5.7	5.7	22	55	97	0.829787	1	6	1
407952	1	0	0	3	24.2	4	29	2.33	0.59	4.4	5.2	5.6	14	53	107.333	0.763441	1	3	0
402835	1	0	0	1	30.7	5	42	2.93	0.71	5.1	5.4	5.4	17	60	115.333	0.812401	1	3	0
406308	1	0	0	2	28.7	4	31	1.98	0.52	4.1	5.1	5.3	22	49	102.333	0.785714	1	3	0
403579	1	0	0	3	33.2	6	45	2.62	1.04	4.7	5.4	4.7	28	49	101	0.821053	1	4	0
406016	1	0	0	2	24.3	2	26	2.3	1.33	4.3	4.6	5	15	61	113.333	0.810056	1	0	0
406997	1	0	0	1	36.3	9	69	3.58	1.71	6.8	7.2	6.3	14	53	181.667	0.989247	1	7	1
402310	1	0	0	4	35.9	10	38	2.71	1	4.5	5.8	4.6	8	62	102	0.898791	1	1	0
401809	1	0	1	3	33.5	6	38	2.68	1.07	4.6	4.7	5.2	15	57	110.333	0.782452	1	9	0
403946	1	0	0	1	25.7	2	31	1.74	0.36	3.9	5	4.7	16	45	99	0.785714	1	2	0
401673	1	0	0	1	28.2	4	35	1.66	0.78	3.6	5.3	4.9	31	57	98.6667	0.818943	1	1	0
411814	1	0	0	1	29.2	5	31	1.56	0.42	3.2	5	5	17	58	111.333	0.895028	1	1	0
408375	1	0	0	5	30	3	53	2.81	1.65	5.1	4.9	5.9	32	44	109.333	0.737968	1	8	0
404951	1	0	0	1	35.8	10	48	2.47	0.66	5.1	5.4	5.4	12	55	135	0.846939	1	1	0
411252	0	1	1	2	14.5	6	50	1.81	0.74	3.8	4.7	5.8	21	64	114	0.810468	1	1	0
405167	1	0	0	1	29.5	3	29	2.01	1.04	4.2	4.9	4.9	26	38	107.667	0.744898	1	1	0
406344	1	0	0	1	31.1	8	30	1.82	1.14	3.8	5.3	5.7	11	59	121	0.876289	1	1	0
406169	1	0	0	3	22.8	1	28	2.32	0.93	4.3	5.58	5.2	6.51	65.72	105	0.697674	1	5	0
408153	1	0	0	1	21.7	1	69	1.85	0.64	4	5.6	5.8	20	59	118	0.72093	1	5	1
407932	1	0	0	1	24.1	1	45	1.76	0.78	4	5.4	5.5	14	49	115.667	0.712644	1	0	0
406604	1	0	0	1	31.1	5	40	2.5	1.69	4.6	5	5.1	16	52	112.667	0.802083	1	3	0
405016	0	0	1	5	23.1	9	21	1.79	0.95	3.4	4.7	5.3	17	75	138	0.857143	1	4	0
403475	1	0	0	1	34.3	11	40	1.65	1.04	3.4	4.9	5.5	10	46	109	0.828954	1	0	0
411576	1	0	0	3	20.3	1	27	1.63	0.84	3.5	4.8	5.4	8	76	105.333	0.752774	1	3	0
400615	1	0	0	1	30.4	6	26	2.16	0.7	4.3	5.1	4.3	7	51	112.333	0.8225	1	3	0
409964	1	0	0	3	34.1	12	40	2.24	5.45	5.2	1.5	6.7	14	48	143.333	0.931748	1	4	1
407292	0	1	1	1	17.2	4	46	2.46	1.6	4.7	4.7	5.6	26	69	116.333	0.8	1	0	0
406221	1	0	0	4	32.1	7	51	2.36	1.35	5	5.2	5.6	20	51	109	0.752577	1	2	0
404063	1	0	0	1	31	5	31	2.69	0.9	3.9	4.7	4.8	14	50	116.667	0.816326	1	1	0
404838	1	0	0	1	32.9	7	58	2.29	0.67	4.3	5.1	5.2	25	56	129.333	0.82	1	0	0
404052	1	0	0	1	31.1	7	33	3.32	1.37	4.6	5.7	4.9	25	55	108.667	0.854167	1	5	0
403949	1	0	0	1	27.8	5	27	3.18	0.93	5.1	5.3	5	17	49	105.333	0.807692	1	1	0
409974	0	1	1	1	32.8	23	70	3.8	4.3	6.6	8.7	7.4	10	177	169.667	0.957052	1	6	1
400274	0	1	1	1	32.9	11	62	2.5	1.18	4.4	5.3	5.2	16	63	126	0.937198	1	2	0
405266	0	1	1	1	13.7	4	30	2.1	1.44	4	4.9	4.4	25	78	107.333	0.836956	1	6	0
401760	1	0	0	2	36.2	9	67	3.26	0.56	6.1	5.5	5.1	41	48	128.333	0.935236	2	14	1
406923	1	0	0	3	29.8	5	32	2.76	0.77	5	5.1	5.6	14	63	123.333	0.902174	1	2	0
411453	0	2	2	1	25.9	14	54	3.06	2.54	5.7	5.21	5.5	14.97	95.19	146.333	0.958128	1	8	1
407110	1	0	0	2	35.4	10	47	2.91	0.84	4.8	5.4	6.2	9	52	115.667	0.88	2	4	0
409912	1	0	0	1	42.5	21	70	3.99	1.98	7	8.5	7.9	12	70	135.333	1.03778	2	0	1
400261	1	0	0	1	30.1	5	36	2.88	0.52	5.1	5.4	5	21	41	120	0.794464	1	5	0
402290	0	0	2	1	25.9	12	60	2.38	4.67	5.2	7.5	5.9	25	99	156	0.933654	1	4	1
406155	0	0	1	4	28.6	20	58	2.81	0.67	5	5.5	5.7	18	73	126.333	0.990196	3	4	0
405094	1	0	0	4	36.1	8	65	3.09	1.86	5.9	5.3	5.2	33	56	144.667	0.8	1	7	1
404936	0	1	0	3	18.3	7	29	2.29	1.03	4.1	6.6	4.8	20	83	123	0.877551	3	3	0
408230	1	0	0	1	39.5	14	60	2.09	0.98	4.4	6.6	6	17	54	166.333	0.923809	1	5	1
406023	1	0	0	1	31	5	47	3.2	1.1	5.1	4.8	5.2	22	63	104.333	0.969388	1	2	0
405571	1	0	0	1	26	3	44	1.93	0.59	4.1	5.2	5.4	14	57	103.333	0.777778	1	3	0
407452	0	0	0	1	30.1	22	64	3.4	2.02	6.1	6.84	6.6	21.06	89.89	129.333	0.971963	3	2	1
404420	0	1	1	1	30.4	14	82	3.83	1.08	5.3	5.3	5.8	14	100	137.667	0.909091	1	2	1
401495	1	0	0	1	34.5	8	70	2.26	1.35	3.6	6.3	6.4	25	45	135.333	0.896059	3	2	0
406514	1	0	0	1	31.1	4	72	2.45	1.44	4.7	5.21	5.7	17.29	48.53	132.333	0.831461	1	6	0
409805	1	0	0	1	40.1	11	75	3.5	2.06	6.3	17.5	9.7	14	55	129	1.03585	3	11	1
403013	1	0	0	1	34.8	9	67	4.33	0.8	7.4	5.37	5.4	68.02	47.49	134	0.832194	3	5	1
400136	0	1	1	2	26.1	14	71	3.77	1.03	5.7	5.4	5	22	90	124	0.884671	3	1	1
400511	1	0	0	2	20.4	2	26	2.24	0.39	4.7	5.3	5.1	7	53	101.667	0.741755	1	2	0
401210	0	2	1	1	30.2	17	66	5.22	1.92	6.2	8	7.7	21	69	151.333	0.966545	3	1	1
411470	1	0	0	1	30.8	8	41	2.76	0.85	5.1	4.7	5.8	11.17	52.66	111.333	0.85541	1	2	0
405215	1	0	0	1	36.8	11	46	2.4	1.54	4.6	5.9	5.3	49	44	120	0.867924	1	7	0
402570	1	0	0	1	34.9	10	42	2.51	0.88	4.6	5.2	5.8	13	45	121.333	0.803766	1	1	0
408362	0	0	0	1	24.6	13	62	2.72	1.39	4.9	5.1	6.3	19	78	133.333	0.92	2	6	0
404955	1	0	0	1	34	10	34	1.34	1.17	3.4	5.2	5.1	22	46	111.333	0.785714	1	1	0
404168	0	0	0	1	29.1	14	63	3.01	0.93	4.4	5.7	5.4	17	73	123	1	1	4	0
405394	1	0	0	1	34.7	12	60	2.85	1.42	5	5.1	5.4	16	56	114.667	0.823529	1	3	1
404725	1	0	0	1	37.3	9	42	2.63	1	4.4	5.5	5.1	25	46	105.333	0.862745	1	6	0
406622	1	0	0	1	34.5	8	45	2.33	1.38	4.7	4	4.8	10	54	127.667	0.833333	1	6	0
403081	0	0	1	1	33.3	16	72	3.27	1.41	5.4	6.5	7.4	22	66	127.333	1.0192	2	2	1
404668	1	0	0	1	32.1	5	25	1.9	0.37	3.8	5	4.6	24	55	118.333	0.833333	1	3	0
402317	0	0	0	3	22.4	10	50	1.89	1.33	3.7	5.7	4.3	14	68	112.667	0.94709	1	2	0
409720	1	0	0	2	30.2	3	39	2.49	0.77	4.6	5.6	5.9	10	62	91	0.762192	1	2	0
411198	1	0	0	1	36.4	14	53	1.93	0.99	3.6	4.8	5.5	11	63	113.333	0.903226	1	2	0
403386	1	0	0	1	41.4	11	77	2.76	3.99	7	5.8	6.3	38	87	157.667	0.956186	1	3	1
402599	1	0	0	2	35.4	9	42	2.91	1.04	4.7	6.75	5.9	8.37	55.87	104.667	0.930392	1	3	0
409777	0	0	0	1	34	22	71	2.57	1.27	4.5	5.6	6.2	14	83	126.667	1.02399	3	5	1
406301	1	0	0	1	40.5	8	66	1.95	0.86	4.3	4.6	6.5	35	63	167	0.952381	3	2	1
400998	1	0	0	1	39.7	13	59	4.54	3.1	7.6	6.2	5.7	17	47	142.333	1.01726	1	7	1
400775	0	2	0	1	24.5	4	61	3.16	0.88	4.1	5.6	5.3	8	59	113.333	0.753896	1	2	0
403038	1	0	0	1	35.8	6	72	4.08	1.31	6.6	4.2	5.6	25	42	184.333	0.961094	1	1	1
407922	1	0	0	1	28.9	4	37	2.23	0.87	4.6	5.6	5.7	14	49	93	0.698925	1	0	0
405733	1	0	1	1	24.7	2	30	1.87	0.53	4.2	5.6	4.8	12	57	99.3333	0.711111	1	3	0
405848	0	0	0	1	20.6	8	53	1.66	1.12	3.4	5.8	5.8	109	66	112	0.83	1	1	0
400453	1	0	0	1	37.3	10	55	4.24	1.08	6.4	5.8	5.7	12	64	105	0.924332	1	2	1
401083	0	0	1	1	24.9	10	54	3.12	1.28	5.1	5.5	5.3	163	74	138	0.935904	2	2	1
405415	1	0	0	3	33.6	10	55	2.61	1.37	4.6	4.5	4.6	38	69	123.333	0.876289	1	2	0
407842	1	0	0	1	35.3	6	70	2.95	1.41	5.1	5.4	5.9	6	65	133.667	0.764706	1	2	0
401790	1	0	0	1	28.4	4	31	2.13	0.48	4.9	5.4	5	12	51	112.333	0.749211	1	2	0
404707	1	0	0	1	32.7	8	48	2.51	0.66	4.7	5.1	4.8	13	60	125	0.833333	1	1	0
406112	1	0	0	3	23.7	3	34	2.46	0.76	5	5	5.4	15	64	94.6667	0.72043	1	2	0
403021	0	1	0	1	15	3	64	1.93	0.72	4.5	4.44	5.7	15.69	59.54	124.667	0.833644	1	2	0
400419	1	0	0	2	36	11	46	2.61	0.71	4.4	5.2	5	18	48	129.667	0.847368	1	3	0
410074	0	1	1	1	22.1	10	38	3.64	1.51	6	6.6	6	26	66	142.667	0.938559	1	2	1
403208	0	1	0	1	19.5	6	62	2.21	0.52	4.1	6.6	5.6	13	72	116.333	0.865011	1	2	0
401979	1	0	0	2	29.4	6	34	2.45	1.02	4.4	5.1	5.1	9	58	118.667	0.78045	1	4	0
401633	1	0	0	2	26.7	3	39	1.49	0.66	3.4	5.5	4.9	13	60	106.333	0.835346	1	2	0
407923	1	0	0	1	28.6	2	38	1.98	1.58	4.6	5.2	6.1	9	44	95	0.752688	1	5	0
408056	1	0	0	2	27.4	4	28	1.34	1.1	3.7	5.2	5.8	10	62	104.333	0.778947	1	3	0
405055	1	0	0	2	31.8	5	29	2.46	0.77	4.7	5.2	4.9	12	62	109.667	0.803922	1	3	0
404831	1	0	0	1	31.9	5	33	0.89	0.45	3.3	5.3	4.6	16	55	111.667	0.821782	1	4	0
400008	0	0	0	1	21.3	8	53	2.38	1.06	3.5	9.7	7.4	33	65	138.667	0.851295	2	2	1
408525	1	0	0	1	27.7	4	48	1.95	1.02	4.5	4.8	5.7	30	43	130.667	0.808275	1	5	0
400821	0	2	2	1	28	13	58	3.85	0.86	4.8	6.5	5.2	22	108	141.333	0.921393	1	11	1
405985	1	0	0	1	31	7	49	2.36	0.89	4.2	5.5	5	19	62	123.667	0.951923	1	1	0
408196	1	0	0	1	37.6	9	52	1.87	1.43	4.2	5.1	5.7	33	58	111.333	0.8125	1	8	0
401887	0	0	1	2	23.4	8	34	2.12	1.63	4.4	4.8	4.7	14	84	107	0.830327	1	4	0
409916	1	0	2	3	19.1	1	33	2.15	0.6	4.4	4.38	5.4	16.54	44.7	114.333	0.780193	1	5	0
406807	0	1	1	1	23.9	13	48	2.81	1.12	5.4	5.4	5.3	11	71	117	0.873684	1	1	1
401138	0	1	1	1	17.3	6	55	2.23	0.48	4.2	5.6	4.7	138	50	128.333	0.820728	1	1	0
406778	1	0	0	2	25	2	34	2.61	0.89	4.7	5	5.3	13	44	109.667	0.855422	3	1	0
405971	1	0	0	3	23.9	2	29	1.96	0.64	4.2	5.3	5	26	59	112.333	0.870057	1	3	0
403756	0	1	1	1	9.4	4	28	1.83	0.46	3.3	4.9	4.7	22	67	123.333	0.888889	1	1	0
406133	1	0	0	2	22.5	2	44	2.74	0.53	5	5.05	5	12.61	64.77	106.333	0.772727	1	1	0
406581	1	0	0	1	30.2	7	34	1.62	1.33	3.7	5.1	5.1	4	45	112.333	0.888889	1	2	0
409794	1	0	0	1	29.3	6	61	2.47	0.62	4.2	5.7	5.9	11	57	111.667	0.869658	1	1	1
402233	1	0	0	3	25.7	3	23	2.37	0.54	4.6	5.8	5.5	10	60	100	0.773304	1	2	0
404794	0	1	1	2	13.7	4	30	4.06	0.84	6.9	5.1	4.8	11	72	135.333	0.811111	2	2	1
405043	0	1	1	3	26.6	10	34	3.85	1.77	5.9	7.2	6.2	62	62	119	0.921569	1	5	1
403871	1	0	0	4	25.1	2	18	2.82	0.87	5	4.8	4.9	17	62	111.333	0.71134	1	7	0
408120	0	2	0	1	22.4	12	61	1.64	1.98	3.6	6	6.1	27	92	95	0.863158	3	3	1
405943	0	2	2	1	26.2	16	50	2.91	2.21	5.2	6.6	5.9	42	86	118.333	0.941748	2	2	1
405431	1	0	0	1	39.3	13	54	1.51	1.38	3.8	5.1	5.3	18	50	118	1.0495	1	2	0
401804	1	0	0	1	32.8	7	68	1.74	0.81	4.2	5.5	5.2	108	65	118.333	0.881119	1	8	0
409957	1	0	0	1	38.2	11	69	2.79	2.83	5	5.74	5.9	25.08	65.96	124.333	1.04483	2	3	1
405526	1	0	0	1	33.9	9	65	3.33	2.69	6	5.7	5.7	19	57	131.333	0.946809	3	3	1
401724	1	0	0	1	40	16	57	2.66	1.97	4.9	6.9	5.2	20	76	185.333	1.02694	3	8	1
402591	1	0	0	1	35.3	11	52	2.39	0.56	4.7	4.8	5.7	13	66	138	0.913185	1	3	0
406593	1	0	0	1	41.9	19	66	1.75	2.7	4.1	5.89	5.8	38.25	72.45	162	1.05769	3	4	1
407670	1	0	0	2	43.2	19	67	2.5	2.54	4.8	8.2	7.5	36	50	134.333	0.980583	1	13	1
402218	1	0	0	4	37	14	57	2.06	2.67	4.1	4.96	5.6	16.38	55.4	110.667	1.0097	2	6	1
404327	1	0	0	2	31.7	5	44	3.05	0.87	4.8	5.4	5.8	16	50	124.333	0.8	1	3	0
402361	1	0	0	1	35.6	11	58	3.26	2.67	6.2	5.8	6.9	15	54	133	1.01361	1	15	1
404493	1	0	0	4	33.9	7	25	2.36	0.8	3.5	5.2	5.1	20	67	110	0.85	1	3	0
406294	1	0	0	1	28.1	4	31	1.62	0.59	3.7	5.1	5.1	8	49	98.3333	0.791209	1	2	0
405342	1	0	0	1	30.2	8	45	2.44	0.96	4.3	5.4	5.2	16	51	123	0.810526	2	4	0
411574	0	2	0	2	33.1	28	64	3.74	2.01	5.4	4.92	6.3	9.99	70.07	141.667	0.991499	1	4	1
405205	1	0	0	1	37.6	12	71	2.9	2.78	4.8	6.9	5.9	25	70	157.667	0.845454	1	3	1
408347	1	0	0	1	40.8	18	69	3.03	1.6	4.8	4.7	6.2	28	75	177	0.95283	3	4	1
408535	1	0	0	2	37.6	11	42	2.35	1.47	4.8	6.5	5.6	17	57	109.667	0.884425	1	6	0
406980	1	0	0	3	27.1	5	44	2.35	0.89	4.6	4.9	5.4	22	60	122	0.776596	1	2	0
408309	1	0	0	1	39.7	14	67	3.12	3.41	5.5	5.3	5.9	21	54	123.333	0.959596	1	2	1
405165	1	0	0	1	33.3	5	57	2.53	1.21	4.7	5.5	5.1	18	77	122.667	0.762887	1	7	0
406316	1	0	0	2	30.8	5	47	2.27	0.68	4.7	5.8	5.6	8	53	111.333	0.826087	2	1	0
400555	1	0	0	1	30.7	7	60	2.05	0.82	3.9	5.3	5	16	60	134.667	0.82001	1	3	0
405876	0	1	1	2	22.9	10	39	3.13	1.03	5	6.9	5.4	65	65	129.667	0.95	1	0	0
402451	0	2	2	1	30.3	16	77	3.15	1.05	5.4	5	5.9	32	87	130	0.969264	1	4	1
404857	0	2	0	2	29.9	13	59	2.16	2.01	4	5.6	5.3	47	74	100	0.910891	1	4	1
405111	0	2	0	1	27.9	15	79	2.63	2.31	4.8	5.1	5.9	34	75	160.667	0.919192	3	1	1
407666	1	0	0	1	35.6	9	35	2.72	1.23	4.9	4.7	5.3	8	43	110.667	0.803922	1	1	0
407788	1	0	0	1	49.7	28	69	2.56	0.96	5	5.6	6	25	32	135.667	0.908257	1	9	1
403226	0	2	1	3	27.4	6	66	3.3	1.27	5.9	5.5	5.9	18	77	145.667	0.912536	3	4	1
404086	1	0	0	1	36.1	7	63	2.52	1.36	3.9	5.5	5.2	18	48	156	0.945652	3	4	1
407248	0	2	0	1	28.3	23	71	3.47	1.46	6.1	6.6	6.3	17	90	132	0.972477	1	2	1
403316	1	0	0	3	25.7	2	33	1.5	0.63	3.5	5.2	5.3	5	54	104.667	0.745997	2	1	0
400613	1	0	0	2	34	8	44	2.16	0.5	4.4	5.4	5.2	12	41	116.333	0.831241	1	2	0
403867	1	0	0	2	31.7	8	40	2.85	1.65	4.8	4.7	4.9	11	36	122.667	0.85	1	2	0
400326	0	1	0	1	28.1	10	65	2.53	0.54	4.1	4.3	5.1	12	48	122.333	0.858537	1	3	0
404276	0	1	1	1	20	5	25	2.79	0.97	4.2	5.2	4.5	26	72	113	0.773196	1	0	0
410886	1	0	0	1	27	6	48	2.4	1.02	4.3	5.4	5.7	12	57	109.667	0.821068	1	1	0
405293	1	0	0	3	29.8	5	41	2.46	0.69	4.8	5	4.7	13	53	112	0.770833	1	3	0
410722	0	0	1	1	21.2	13	65	2.76	0.83	4.9	4.6	5.8	22	73	127	0.860172	2	3	0
400409	1	0	0	1	34.5	10	25	2.99	1.28	4.8	5.7	5	22	47	113.667	0.872549	1	0	0
407386	1	0	0	3	33.9	6	53	2.71	1.21	4.8	4.85	5.5	34.3	56.11	119.333	0.866667	1	4	0
411212	0	1	1	1	21.9	6	58	2.46	1.62	4.4	5.2	6.3	14	79	131.333	0.880217	1	1	0
403141	1	0	0	4	35.9	9	52	3.24	2.34	5.9	5.2	6.1	7	52	115.667	0.84556	1	4	1
403502	1	0	0	1	31.2	5	28	2.48	0.95	4.8	5.4	4.8	61	45	120.667	0.806931	1	2	0
410485	0	1	0	1	25.1	5	67	2.46	0.68	4.4	5	5.8	12	63	111.333	0.900546	1	1	0
403421	1	0	0	3	27	4	29	2.26	1.09	5.1	5.8	5	16	62	113.333	0.816172	1	2	0
409909	1	0	0	1	37.8	9	69	4.53	1.68	7.2	6.08	5.8	19.76	63.02	160.333	0.894105	3	6	1
403783	0	0	0	4	24.3	5	26	2.8	0.91	4.3	4.4	4.9	14	70	127	0.808511	1	3	0
408338	1	0	0	1	28.2	4	41	2.32	1.01	4.6	5.3	5.8	11	58	112	0.797872	1	6	0
406905	1	0	0	1	31.5	4	39	1.74	0.96	4.5	4.7	5	15	54	99.3333	0.831461	1	0	0
404285	1	0	0	2	24.5	3	29	1.99	0.49	3.5	5	4.3	10	49	113	0.747368	2	3	0
405610	1	0	0	2	29	5	42	2.14	0.69	4.4	4.8	5.2	17	55	121.667	0.816216	2	5	0
400490	1	0	0	3	27.5	3	46	2.39	0.8	4.3	4.3	5	17	64	128.667	0.780607	3	2	0
401869	1	0	0	2	26.6	3	37	1.82	1.04	3.8	5.5	4.9	19	47	114	0.773932	1	7	0
405851	1	0	0	4	34.2	10	51	2.29	1.17	4.3	4.5	5.5	18	48	103.667	0.851852	1	6	0
402163	1	0	0	1	34.9	9	71	4.55	3.11	8.3	5	5.9	15	76	165	0.937768	1	2	1
408326	0	2	2	1	28	13	65	1.73	0.83	3.6	7.3	7.9	15	82	127.667	0.897959	3	2	1
408568	1	0	0	4	28.1	5	53	1.73	0.56	3.7	5.2	4.8	20	52	126	0.80996	1	6	0
405882	1	0	0	1	24.2	3	35	1.94	0.54	4.1	4.7	5.2	17	50	92	0.810811	1	2	0
402994	1	0	0	2	27.6	4	29	1.72	0.78	3.4	5.49	5.5	8.38	51.52	98	0.855636	1	2	0
405736	0	1	1	3	16.6	7	45	2.56	1.27	4.7	5.4	5	10	75	110	0.851064	3	1	0
402750	0	1	1	3	12.9	3	20	2.28	0.93	4.5	5.8	4.8	18	75	118	0.819149	1	2	0
411601	1	0	0	1	28.4	6	43	1.98	0.97	4.3	4.9	5.3	13	51	111.333	0.872454	1	3	0
408590	1	0	0	2	24.5	3	42	1.86	1.22	4.4	5.6	4.9	7	61	103.667	0.721919	1	2	0
401343	1	0	0	2	31	3	34	2.94	1.04	4.1	5	5.9	16	46	105.333	0.863537	1	3	0
402958	0	2	2	1	36.3	10	77	2.84	1.27	4.9	4.75	5.1	11.62	57.03	125.667	1.02462	1	1	1
403928	1	0	0	1	24.6	3	27	2.12	0.71	3.6	4.4	4.9	15	58	114	0.75	1	5	0
407414	1	0	0	4	32.7	8	52	2.04	1.1	3.9	5.08	6.3	10.97	42.97	105	0.8	1	3	0
402968	0	1	1	4	18.2	5	60	2.52	0.92	4.6	5.57	5.3	14.88	57.6	118.667	0.888767	1	10	0
404867	1	0	0	2	31.3	5	43	1.98	0.77	4	5.3	4.8	16	51	130	0.865979	1	4	0
407903	1	0	0	4	25.4	3	45	2.53	1.48	4.8	5.3	5.8	12	51	109.333	0.817204	1	4	0
405551	1	0	0	1	32.4	8	30	2.68	1.23	4.9	5	4.7	30	58	102.667	0.805825	1	7	0
411291	1	0	0	3	26.7	5	31	2	0.93	4.5	4.21	5	11.17	62.12	113	0.792215	1	5	0
408360	1	0	0	4	28	4	32	2.09	0.97	4.5	5.3	5.6	10	62	100.667	0.682692	1	2	0
406623	1	0	0	2	25.8	2	36	1.74	1.04	4.4	5.4	5.4	17	69	104.333	0.772727	1	3	0
406995	1	0	0	2	26.2	2	32	1.68	1.5	3.9	5.4	5.5	11	51	106.667	0.769231	3	2	0
410227	0	1	0	1	9.1	4	21	1.56	1.2	3.3	5	5.5	19	61	111.333	0.814663	1	2	0
404914	0	0	0	1	26.7	16	61	3.06	0.94	5.2	5.5	5.3	25	76	145	0.851852	2	2	1
404581	0	1	1	2	27.2	16	46	3.07	0.78	4.4	6.8	5.7	43	71	132	0.940594	1	1	0
407197	0	2	0	1	17.4	6	57	2.62	0.76	4.8	5.9	5.6	18	58	111.667	0.802198	1	1	0
406823	1	0	0	1	33.9	9	43	1.71	1.67	3.9	5	5.4	20	73	116	0.828283	1	2	0
409526	1	0	0	1	33.6	8	59	2.55	1.53	4.8	5.7	5.6	9	66	128.667	0.880656	1	7	0
406484	1	0	0	1	38.7	13	54	3.07	2.37	5.6	5.9	6.2	22	52	126	0.906542	1	7	1
404158	1	0	0	4	35	8	68	2.56	3.35	4.8	5.3	5.1	15	54	145	1.03191	1	2	1
407279	1	0	0	1	34.2	10	63	2.31	1.75	4.5	5.6	5.4	18	71	122	0.912621	1	4	1
407227	1	0	0	1	41.1	21	51	3.1	1.97	5.8	4	6.2	18	57	177	1.00909	3	2	1
410433	1	0	0	1	40.8	16	71	2.3	1.84	4.5	6.6	7	22	61	178.333	0.935421	1	3	1
411306	0	1	2	1	20	9	66	2.23	0.72	4.6	4.6	5.1	16.06	78.04	132.667	0.824802	1	2	0
406198	1	0	0	2	30	3	42	2.79	0.64	5.1	5.7	5.5	10	44	106.333	0.789474	2	0	0
406208	1	0	0	1	32.6	7	45	2.25	1.12	4.3	6.3	5.2	15	44	116	0.811881	1	2	0
411002	1	0	0	1	31	5	44	2.34	0.92	4.3	5.1	5.9	18	57	100.333	0.757808	1	7	0
411005	1	0	0	1	38.4	9	69	3.9	1.03	5.8	6.4	6.5	22	53	166.667	0.999464	1	12	1
406687	0	1	1	1	25.8	12	23	3	1.69	5	5.6	5	43	84	117.333	0.895238	1	2	0
410165	1	0	0	1	37.7	10	69	2.79	1.83	5.4	5.2	6.1	12	53	141.333	0.972056	1	3	1
405454	1	0	0	1	35.8	4	46	2.22	1	4.7	5.1	5.2	13	60	106	0.8	1	5	0
402456	1	0	0	1	31.6	6	50	2.24	0.85	4.5	4.8	5.9	9	49	119.667	0.850714	1	11	0
403143	1	0	0	4	29.9	5	53	2.29	4.44	5.1	4.8	5.4	23	56	127.667	0.841491	1	6	1
403650	0	1	0	1	28.2	14	63	2.39	0.97	4.3	6.1	5.3	31	80	116.667	0.92	1	3	0
400330	1	0	0	4	40.9	12	67	0	1.97	3.9	4.7	5.7	40	45	135.667	0.902278	2	2	1
404670	0	0	0	2	23.4	6	20	2.63	1.2	4.9	5	4.7	21	73	123.333	0.785714	1	3	0
407284	1	0	0	1	31.2	6	53	2.43	1.3	4.8	5	6	10	52	129.333	0.786458	1	1	0
403406	1	0	0	1	32	5	49	2.44	1.94	4.9	5.5	5.4	9	71	122	0.84449	1	7	1
404180	1	0	0	1	39.7	9	66	2.97	6.47	6.7	6.6	5.1	20	59	154.333	0.89899	1	11	1
410727	1	0	0	1	39.4	9	60	3	1.65	5.3	5.7	6.5	15	49	116	0.894422	1	8	1
403794	1	0	0	4	36.1	8	47	1.88	1.35	3.7	5.7	4.8	13	38	117.333	0.989362	1	1	0
411612	1	0	0	1	32.3	5	49	2.46	1.46	4.8	5	5.8	14.05	57.43	115.333	0.808064	1	1	0
403395	1	0	0	1	40	10	69	5.22	2.59	8.5	5.23	6.1	8.98	81.31	146	0.982998	1	3	1
411575	1	0	0	1	39.3	12	66	2.91	1.11	4.7	5.73	5.8	17.55	55.47	117.333	0.833762	1	2	0
404829	1	0	0	1	33.2	8	50	1.89	0.87	4.6	6.5	5.6	27	56	124.333	0.857143	1	3	0
409834	1	0	0	2	27.1	4	54	2.23	1.46	4.8	5.4	5.9	13	49	125	0.976683	1	1	0
402407	1	0	0	2	25.8	4	52	2.32	0.87	4.2	5	5.8	14	60	103.667	0.788991	1	9	0
400739	1	0	0	1	25	2	45	3.25	1.02	4.8	5	4.9	13	53	119.333	0.737183	1	2	0
402223	0	1	0	1	32.6	14	70	2.9	4.77	6.1	4.84	5.8	69.31	131.79	111.667	1.06873	3	5	1
402248	0	1	2	1	24.2	12	55	1.72	0.73	3.7	4.9	5.4	30	65	108.333	0.932622	1	5	0
405521	1	0	0	2	25.4	4	44	1.72	0.42	3.9	5.1	4.5	8	48	128	0.810526	1	4	0
411022	0	1	1	1	23.1	11	54	1.77	1.49	4.2	5.8	5.7	22	55	122.333	0.893051	1	2	0
405292	1	0	0	3	35	8	23	2.16	0.54	3.9	5.4	5.2	15	59	101	0.825243	1	2	0
405670	1	0	0	1	32.8	4	50	2.93	0.96	4.9	5.5	5.5	14	73	113.667	0.824176	1	1	0
404507	1	0	0	2	26.6	3	27	2.67	0.93	4.2	5	5.1	11	64	120.667	0.773196	1	3	0
400670	1	0	0	2	25.8	3	27	2.66	0.51	3.8	5	4.9	9	56	111	0.761583	1	3	0
403223	1	0	0	1	37.3	11	66	4.79	1.9	7.6	10.3	8.5	21	45	126.667	0.952779	1	7	1
401534	1	0	0	1	30.5	7	48	2.67	0.7	4.7	5.2	4.9	14	63	115.333	0.817352	1	1	0
406266	1	0	0	1	31.8	6	29	1.51	1.24	3.8	4.8	5.4	10	66	121.667	0.732673	1	1	0
411373	1	0	0	1	22.9	3	36	2.7	0.75	5	5.17	5.1	11.35	54.93	108.667	0.792949	1	12	0
407929	1	0	0	2	31.6	4	35	2.64	0.67	4.9	5.6	5.3	14	50	123	0.744681	1	3	0
401011	1	0	0	3	29.2	4	46	2.27	1.49	4.7	5.5	5.8	10	60	99.3333	0.82088	2	1	0
408555	0	1	1	1	20.6	8	31	2.23	0.8	4.6	5.6	5.4	30	56	117.667	0.877738	1	3	0
404050	1	0	0	2	33.8	7	37	2.69	1.07	4	5.9	5.2	14	49	128	0.807692	1	1	0
411659	1	0	0	1	35.8	7	55	2.94	1.9	5	4.3	5.8	16	72	147	0.849462	2	4	1
405420	1	0	0	1	29.5	6	57	2.42	1.03	4.4	5.1	5	13	63	112	0.757576	1	4	0
407441	1	0	0	1	33.5	7	65	1.75	1.13	3.7	5.74	6.1	11.59	66.88	107.667	0.84375	3	5	1
406719	1	0	0	1	27.8	5	46	2.78	0.88	5.1	5.7	5.6	10	57	108.667	0.829787	1	3	0
408085	1	0	0	2	29.6	5	27	2.22	0.94	4.6	5.3	5.5	6	54	123	0.756614	2	2	0
401614	1	0	0	2	29.6	5	47	1.4	1.41	3.6	5.6	5.2	11	57	101	0.871225	1	1	0
410755	1	0	0	3	31.9	6	36	2.21	0.47	3.9	4.6	5.4	8	47	99.6667	0.890044	2	2	0
403699	1	0	0	3	31.7	6	45	2.36	1	4.4	4.6	5.2	27	42	123	0.737374	1	3	0
402622	0	0	1	1	16.8	7	49	3.42	1.63	5.6	4.6	5	28	76	119	0.90411	1	2	1
406017	1	0	0	1	30.1	5	38	1.97	0.69	3.7	5.2	5.2	13	63	103	0.76699	1	1	0
406616	1	0	0	1	23.5	2	28	1.73	0.4	3.5	5	5.4	16	53	103.333	0.758242	1	3	0
406364	1	0	0	1	34	8	27	2.23	0.55	4.4	5.3	5.2	36	51	123	0.807692	1	1	0
411641	0	2	2	1	31.8	21	72	3.33	1.34	5.4	8.4	9.4	26	71	141.667	1.06324	3	3	1
406510	1	0	0	1	28.6	5	28	1.76	0.94	3.8	4.91	5.2	8.58	53.34	103	0.78	1	0	0
405747	0	0	1	1	16.7	8	61	1.75	0.62	4.5	6.1	5.4	13	80	128.333	0.810526	2	5	0
404855	1	0	0	2	22.9	1	29	1.8	1.63	4.2	4.9	5.3	14	59	107.333	0.714286	1	5	0
404325	1	0	0	3	33.5	7	29	2.92	0.73	4.3	4.9	5.8	18	58	115.667	0.816326	1	4	0
411729	1	0	0	5	26.3	4	45	1.71	0.9	4.1	4.7	5.3	10	46	105.667	0.817204	1	7	0
411265	1	0	0	1	28	4	27	0.47	0.46	2.4	4.9	5.3	9	52	101	0.781886	1	1	0
411721	1	0	0	1	41.4	17	66	3.3	2.39	5.8	5	6.2	15	66	119.333	1.04972	3	3	1
405757	0	1	2	1	11.2	5	46	2.43	0.74	4.9	6.1	4.9	19	65	118.333	0.775281	1	5	0
402466	1	0	0	1	29.9	8	51	2.43	0.68	4.8	5.2	5.8	10	62	124	0.746766	1	2	0
403349	1	0	0	1	33.8	6	63	3.27	1.96	5.9	8.6	6.8	13	55	170.667	0.975758	1	4	1
402177	1	0	0	1	34.9	9	58	3.18	2.22	6	5.9	5.3	137	46	108	1.00646	1	5	1
402346	1	0	0	1	35.8	12	31	2.27	1.41	4.1	5.1	5.3	24	54	105.667	0.862585	1	6	0
410438	0	1	2	1	30.3	22	69	2.9	4.44	5.6	4.7	6	26	73	155.667	1.0517	2	4	1
405989	1	0	0	1	29.2	5	25	2.72	0.75	5.1	4.7	5	10	53	105.333	0.869792	1	1	0
403085	0	0	1	1	30	19	54	2.52	5.95	5.9	11.34	7.3	35.21	61.82	148.667	1.0354	1	9	1
402081	1	0	0	1	37.7	13	46	2.36	2.37	4.4	6.9	5.8	39	58	124	1.02453	3	2	1
410749	0	1	0	1	19.5	9	62	3.09	1.04	5.3	4	5.7	15	62	121.333	0.769307	1	6	1
409762	1	0	0	3	34.9	9	61	2	1.73	4.7	5.6	6.3	21	55	126	0.980567	1	5	1
402041	0	2	2	1	29.2	10	56	2.38	2.63	4.7	10.5	8.5	22	77	129.333	0.931855	3	3	1
409681	1	0	0	1	30.1	6	55	2.29	1.62	4.4	5.1	5.9	21	48	112.333	0.840469	2	3	1
405631	1	0	0	1	39.8	13	71	2.92	2.1	5.3	7.1	6.9	8	45	120	0.989247	1	5	1
405897	0	2	0	1	27	20	68	3.29	1.38	5.3	4.8	5.3	17	74	132.667	1.05048	3	4	1
403720	0	1	1	1	29.2	18	75	2.65	1.59	4.5	5.1	5.2	15	66	122.667	0.961538	1	1	0
407049	1	0	0	1	34.8	7	52	2.1	1.21	4.4	6.5	6	11	61	133.667	0.814433	1	3	0
410085	1	0	0	1	29.3	6	52	2.8	0.91	4.9	5.4	5.6	13	53	130.333	0.884449	1	2	0
401947	1	0	0	1	39.5	11	70	2.99	1.32	5.6	5.3	5.4	14	72	147	0.778263	1	4	1
401412	1	0	0	1	36.7	11	59	2.87	3.26	4.1	6.1	5.4	21	66	133.333	0.970694	1	3	1
406779	1	0	0	3	33.4	7	41	1.97	1.6	4	4.5	5.5	6	70	99.6667	0.857143	1	3	0
411492	1	0	0	4	35.5	9	66	4.83	1.19	7.7	5.4	5.6	10	61	143.333	0.793305	1	4	1
401079	1	0	0	2	33	7	40	2.71	0.95	5.1	5.6	5.8	16	57	118	0.841538	1	4	0
407293	1	0	0	1	30.8	7	54	2.19	0.76	4.6	4.9	5.4	10	47	126.333	0.864583	1	0	0
410149	1	0	0	1	35.5	4	76	3.31	1.36	5.5	6.5	6.4	13	71	151.667	0.950031	1	5	1
405097	0	1	0	3	20.1	6	44	1.94	0.8	3.8	5	5.4	18	63	128	1.08989	1	3	0
409760	1	0	0	2	36.7	11	65	2.86	0.74	5	5.4	5.8	15	66	127.333	0.963617	1	6	0
403839	0	1	1	1	26.4	10	28	2.11	1.28	3.9	5.2	5.2	38	78	122	0.862745	1	1	0
405980	1	0	0	2	26.7	4	45	2.65	0.86	4.7	4.9	5.2	11	53	114	0.79	1	1	0
409710	1	0	0	3	22.5	2	39	1.88	1.42	4.4	4.6	6.1	21	58	117	0.791954	2	6	0
409883	0	2	2	1	30.8	19	70	2.38	1.47	4.6	5.33	5.6	26.63	69.72	141	0.863702	2	10	1
402857	0	2	2	2	27.6	14	50	2.79	0.98	4.7	5.5	5.5	14	72	100.667	0.93399	1	3	1
411804	1	0	0	2	35.9	11	69	2.3	1.68	4.5	6	5.9	17	71	130	0.98427	1	3	0
403394	0	0	0	1	36.7	17	80	3.65	1.17	5.8	5.87	5.7	10.41	106.18	134.667	0.940237	3	5	1
403674	0	1	1	1	16.5	4	77	3.28	0.74	6.1	5.4	4.8	13	83	148.667	0.804348	3	2	1
400548	1	0	0	1	28.1	4	34	2.22	0.4	3.8	4.8	5	14	47	106.333	0.840124	1	0	0
403618	1	0	0	1	32.7	6	32	2.66	0.66	4.5	5.2	4.6	18	50	104.667	0.845361	2	4	0
407152	1	0	0	1	38.8	12	60	2.82	0.77	5.1	6.4	6.1	15	64	114.333	0.901961	2	1	1
409850	1	0	0	1	36	11	48	2.58	0.95	4.6	5.87	6.1	11.59	42.89	137.333	0.889214	1	8	1
404559	1	0	0	3	22.6	2	31	1.44	1.43	3.7	4.7	4.5	21	66	108.667	0.784946	1	6	0
404430	1	0	0	1	30.4	5	38	3.34	0.7	4.9	5.1	5	13	47	128.333	0.767677	1	4	0
402641	1	0	0	2	26.7	5	38	2.62	0.86	4.5	5.9	5.5	9	65	121	0.795747	1	3	0
403960	1	0	0	2	33.6	10	37	2.71	0.88	4.4	5	5	16	57	114.333	0.846154	1	6	0
406106	1	0	0	1	33.5	8	64	3.44	1.58	6	5.4	5.9	17	46	185.333	0.867347	3	4	1
406673	1	0	0	2	22.1	2	32	2.31	1.34	4.4	4.9	5.3	9	61	102.667	0.811765	1	0	0
405389	0	1	1	1	32.3	22	70	1.61	3.34	3.9	6.1	5.5	24	81	135	1	2	2	1
411559	1	0	0	1	40.6	7	75	1.64	1.22	2.9	5.17	6.5	29.15	64.35	110.333	0.822296	3	2	1
405859	1	0	0	1	31.1	5	50	3.13	1.06	5.5	4.8	5.1	14	53	133.333	0.831683	1	2	1
405580	1	0	0	1	30.3	5	46	2.59	1.02	4.5	5.3	5.1	12	55	129	0.81	1	3	0
407445	1	0	0	1	29.4	4	19	2.54	0.57	4.6	5.24	5.6	18.31	72.4	109.333	0.733333	1	1	0
401787	1	0	1	1	23.8	4	28	1.29	0.58	3.8	5.4	4.7	12	50	114	0.838389	1	0	0
404680	1	0	0	1	32.3	5	29	2.26	0.48	4.4	5	5	13	45	117.333	0.833333	2	1	0
405578	0	1	0	1	17.6	7	29	2.05	0.83	4	5.1	4.4	28	89	122.667	0.769231	1	3	0
411274	1	0	0	3	27.7	3	31	2.37	0.78	3.9	4.5	5.7	7	46	100	0.817657	1	5	0
405585	0	2	1	1	20.2	8	27	2.06	0.79	3.9	5.4	4.5	16	72	125.333	0.80198	1	2	0
405163	0	2	1	2	19.6	7	21	1.91	0.83	3.6	4.8	4.7	18	75	135.667	0.818653	1	4	0
406315	1	0	0	2	22.2	2	30	2.35	0.45	4.8	5.4	5.4	21	52	121.333	0.727273	1	5	0
406822	1	0	0	1	37.5	11	64	1.95	2.8	4	5.3	5.7	17	53	106	0.938775	2	11	1
403893	0	1	1	3	21.6	8	27	1.57	0.83	4.1	5.7	4.6	27	67	121.333	0.807692	1	3	0
407343	1	0	0	1	39.2	16	36	2.34	1.28	4.5	4.9	6	21	50	128.667	0.904348	1	2	0
402393	1	0	0	2	28.1	5	36	2.11	0.65	4.6	5	5.6	16	55	127	0.700546	1	2	0
406775	1	0	0	2	27.8	3	21	1.97	1.04	4	5.8	5.2	11	61	113.333	0.783505	1	6	0
402369	1	0	0	3	26.9	2	27	2.22	0.67	4.7	4.8	5.8	18	42	98.6667	0.681084	1	2	0
405886	1	0	0	1	21.7	2	36	1.87	0.59	3.9	4.8	5.4	13	58	99.3333	0.805263	1	5	0
404920	1	0	0	1	27.8	4	31	2.14	0.57	4.4	5	4.9	11	49	118.667	0.804124	1	1	0
405302	0	0	1	1	16.8	6	32	2.3	0.46	4.6	5.3	5	43	70	129.667	0.742857	2	2	0
403659	1	0	0	3	25.7	3	27	2.31	0.61	4.4	5.4	4.9	17	60	101.333	0.797753	1	4	0
406162	1	0	0	3	28.1	4	39	2.3	1.37	5	5.2	5.2	32	51	112.333	0.770833	1	5	0
408507	1	0	0	1	29.5	6	37	2.12	1	4.4	4.9	4.6	14	54	118.667	0.80458	1	4	0
406003	1	0	0	3	26.2	3	27	1.7	0.75	3.5	4.8	4.9	17	57	111	0.752688	1	3	0
403692	0	1	0	3	12.6	2	20	2.23	0.8	4.1	4.7	4.8	13	84	113.667	0.693878	1	4	0
403374	1	0	0	1	43.1	15	70	3.85	2.61	6.7	4.8	5.3	19	60	126.333	0.992111	1	16	1
403351	1	0	0	1	34.1	6	53	2.68	1.27	4.9	5.32	5.1	8.56	47.5	117.333	0.846997	1	4	0
407255	1	0	0	1	38.1	13	52	2.86	1.69	4.9	5.5	6.1	33	66	124.667	0.990099	1	1	0
406288	0	2	2	1	27.1	12	70	4.46	1.13	7.5	5.1	5.6	25	70	164	0.988372	3	1	1
404771	1	0	0	2	43.9	17	79	2.09	1.55	4.4	4.7	3	14	75	132	1.01053	2	7	1
406566	1	0	0	1	26.6	4	45	2.17	1.51	4.9	4.9	5.1	22	63.62	100	0.768421	1	1	0
402969	0	1	1	1	32.2	22	58	2.59	3.7	5	12.51	7.7	33.13	77.18	131.667	1.00178	1	2	1
411570	0	0	2	1	27.4	17	76	2.76	1.22	4.2	7.09	7.5	38.9	64.96	135.667	0.932058	1	7	1
404847	1	0	0	1	24.6	3	28	2.24	0.91	4	4.9	4.5	11	52	105.667	0.782609	1	3	0
409542	1	0	0	3	27	3	42	2.84	1.14	5.1	5.1	5.7	16	52	127.667	0.758115	1	5	0
403308	1	0	0	4	33.3	7	42	2.74	1.56	5	4.5	4.8	11	55	109.667	0.766389	1	1	0
409931	1	0	0	1	37.9	12	64	3.55	1.89	6.5	5.79	5.9	22.55	61.34	184.667	0.964749	3	4	1
411613	1	0	0	1	37.4	9	62	4.33	2.17	7.4	5.21	5.9	27.95	61.06	114	0.928997	3	7	1
410841	1	0	0	1	40.1	16	72	3.47	2.84	5.9	5.3	6.5	21	70	145.667	0.988423	1	8	1
404000	0	0	0	4	27.9	14	71	2.99	0.94	4.2	5.2	4.5	25	72	128	0.934579	2	5	1
410089	0	2	2	1	31.9	18	65	3.78	1.54	6	9.5	8	34	61	162.667	0.845711	2	2	1
406402	1	0	0	1	30.5	7	45	2.64	1.07	4.7	5.3	4.9	19	56	132	0.8125	1	3	0
404304	1	0	0	1	32.8	6	46	2.89	1.38	3.9	5.1	5.6	14	56	118.667	0.910112	3	3	0
408076	1	0	0	3	27	4	32	2.57	0.77	4.9	5.1	5.4	11	56	110.667	0.784091	1	5	0
406747	1	0	0	1	26	5	31	2.4	0.77	4.4	4.9	5.4	11	55	103.333	0.814433	1	3	0
410334	0	0	1	5	31	11	79	2.77	0.79	4.8	6.1	5.9	8	119	210.333	1.09994	3	6	1
402256	1	0	0	1	29.4	6	46	2.13	1.29	3.9	5.4	5.3	14	54	111.333	0.84216	1	3	0
407182	1	0	0	3	34.5	11	28	2.05	0.98	4.2	3.7	5.6	9	57	98	0.747573	1	1	0
406892	1	0	0	2	30.6	5	29	2.78	0.92	4.8	4.9	5.3	6	49	102	0.829787	1	3	0
406560	1	0	0	1	24.8	3	47	2.3	1.1	4.6	5.5	5	28	63	124.333	0.806452	1	2	0
401158	1	0	0	2	28.2	7	47	3.38	0.68	4.8	6.1	4.7	13	57	117.667	0.806647	1	4	0
400512	0	1	1	2	16.4	9	62	1.84	1.64	4.6	5.5	5.2	25	60	113.333	0.897893	3	8	0
402299	1	0	0	1	33.2	6	64	2.56	0.79	4.7	5.7	4.6	12	50	112.667	0.836549	1	2	0
408567	1	0	0	1	36.9	11	51	2.57	1.29	5.1	6	5.4	10	70	111.333	0.792908	1	1	0
401057	1	0	0	2	32.4	8	38	2.36	1.01	5	5.1	4.7	8	60	117	0.930998	1	5	0
403416	1	0	0	5	33.8	9	48	2.66	1.17	4.7	6.1	6.1	15	64	118.333	0.844203	1	2	1
407764	1	0	0	4	41.8	21	64	3.63	1.57	6.1	5.6	5.8	13	56	138.333	1.01818	3	3	1
408607	0	0	1	2	13	7	47	2.31	1.08	4.7	5	5.3	21	89	119.333	0.814277	1	3	0
405122	1	0	0	3	34.2	9	37	2.46	0.99	4.2	4.8	5.3	18	66	107	0.854369	2	3	0
403924	0	0	0	1	26.6	15	29	2.62	1.12	3.9	5.4	4.8	13	68	129.333	0.872549	1	2	0
406027	0	0	0	2	24.5	9	31	2.24	1.44	4.1	5.7	5.4	19	81	130.333	0.863636	1	1	0
406241	0	2	1	1	30.9	9	70	1.63	6.4	5.9	6.2	6.4	27	51	131	1.01124	1	4	1
411192	1	0	0	1	28.7	4	62	2.1	0.73	4.1	5.5	6.3	17	45	124	0.859053	1	5	0
404880	1	0	0	3	38.6	12	34	1.88	0.49	4.2	4.9	5.4	16	40	107	0.826087	1	5	0
402255	1	0	0	1	24.1	4	43	2.46	0.73	5.1	5.2	5.3	10.88	56.12	113	0.69863	1	4	0
406960	1	0	0	3	30.5	4	39	1.73	1.03	4.1	5.6	5.2	12	54	116.333	0.787879	1	1	0
405322	1	0	0	1	28.4	3	29	1.75	1.16	3.5	4.3	4.8	15	67	112.667	0.757576	1	4	0
404585	1	0	0	4	35.9	10	44	2.05	0.59	4.7	4.8	5	57	58	124	0.752294	1	5	0
404396	1	0	0	2	23.6	2	36	3.13	0.5	4.3	4.7	5.2	14	71	108.333	0.752688	1	7	0
402543	1	0	0	2	24.9	4	27	1.72	0.34	4	5.4	5.3	10	48	119.333	0.745064	1	2	0
400550	1	0	0	2	26.5	4	31	2.49	1.22	4.3	5.2	4.6	25	57	107.333	0.83798	2	1	0
400068	0	0	0	1	6.7	2	19	2.24	0.53	4.6	5.6	4.7	7	82	113.333	0.770456	1	1	0
401439	1	0	0	1	43	13	66	4.92	3.68	7	11.5	9	43	71	186.667	1.01557	3	9	1
408353	1	0	0	1	32	7	63	2.02	1.92	4	5.5	5.9	23	52	123	0.87234	1	3	1
403272	1	0	0	1	34.4	10	61	1.79	2.3	4.4	5.9	8.6	44	49	145.333	0.933553	1	4	1
410933	0	1	1	4	32	21	54	2.08	1.17	4.2	5.8	5.5	21	65	117.333	0.970715	1	6	0
410867	1	0	0	4	42.3	23	50	2.67	1.67	4.9	5.2	5.8	26	46	122	0.952422	1	6	0
405600	0	1	0	1	21.9	10	28	2.66	0.75	4.6	5.4	5	19	80	112.333	0.843137	1	2	0
410171	1	0	0	1	40.4	15	72	4	1.77	6.4	7.4	7.2	20	72	183	0.894105	3	1	1
405718	1	0	0	1	34.7	10	53	2.6	1.01	4.7	4.9	5.3	19	52	131.333	0.863636	1	1	0
406204	1	0	0	1	39.7	10	76	3.9	1.57	6.8	8.6	7.8	17	46	124.333	1.06522	3	7	1
410570	1	0	0	1	33.7	8	55	2.27	0.9	4.6	5.7	7.4	14	52	149	0.949867	1	6	1
402004	1	0	0	1	41.8	19	68	3.11	3.53	5.6	5.6	5.7	14	52	176.667	1.04807	3	2	1
402993	1	0	0	1	34	10	28	2.75	1.52	5	5.9	6.3	46	65	117.667	0.794973	1	2	0
410637	0	1	0	2	23.7	9	68	2.99	2.8	5.4	5	5.9	16	78	120.333	0.885559	1	3	1
406217	1	0	0	1	41.8	11	65	2.82	1.56	4.9	9.2	6.5	30	48	157.667	1	3	5	1
408208	1	0	0	1	32.2	5	54	2.8	1.51	4.9	5.3	5.5	17	55	113.333	0.754098	1	5	0
411699	1	0	0	4	38.8	13	66	1.94	7.76	7.1	5.5	6.4	23	56	147.333	0.92186	1	12	1
410635	1	0	0	1	40.1	17	66	4.44	1.92	7.2	4.7	6.1	19	56	140.667	0.872688	2	3	1
406691	1	0	0	2	28.1	4	30	2.08	0.88	4.1	5.5	5.4	18	52	114.667	0.776042	1	2	0
403366	0	2	2	1	29.2	17	40	1.53	3.44	3.9	11.3	7	47	55	116	0.998133	1	2	1
406979	1	0	0	1	33.2	5	43	2.64	1.16	5.1	5.7	5.8	29	48	108	0.860215	1	3	0
403948	1	0	0	3	35.4	11	29	2.14	0.74	3.7	5.3	5	25	50	121.667	0.803738	1	7	0
402343	1	0	0	1	28.2	4	31	2.12	0.52	3.8	5.8	5.1	9	65	112.667	0.838624	1	5	0
401027	1	0	0	2	60.8	6	42	2.62	1.34	5.1	5.3	4.9	15	53	123	0.829878	3	4	0
402427	1	0	0	1	37.8	10	74	3.77	1.82	6.7	8	8.7	11	56	135	0.990709	1	3	1
400436	1	0	0	1	33.4	7	37	2	0.98	4.2	5.3	4.7	12	40	115.333	0.847095	1	1	0
403896	1	0	0	2	27	4	35	2.72	0.9	5	4.8	4.9	17	41	104.667	0.884211	1	3	0
409724	0	1	0	2	23.8	14	39	2.09	1.39	4.2	4.9	5.7	19	70	123.667	0.884981	1	4	0
407566	1	0	0	1	38.7	11	63	2.44	1.32	4.3	10.6	8.7	10	50	177	0.851064	2	3	1
409878	1	0	0	1	38.1	12	74	2.21	1.16	4	7.69	8.3	108.24	49.13	149	1.0163	1	6	1
405745	0	1	0	1	24	12	43	3.25	1.48	5.6	6.69	6.6	25.45	70.86	108	0.93	3	5	1
403444	1	0	0	1	37.1	9	66	3.97	1.82	7.4	5.81	7.6	8.78	52.45	134	1.18163	3	5	1
408022	1	0	0	4	20.5	2	31	2.04	0.91	4	5.4	5.7	8	58	108	0.701031	1	6	0
405065	1	0	0	3	28.5	4	37	2.08	0.57	4.6	4.8	5.1	11	53	94	0.731959	1	3	0
403803	0	0	1	1	20.2	6	41	2.8	1.31	4.5	4.6	4.6	31	76	130	0.833333	1	5	0
404504	1	0	0	1	27.3	4	29	2.56	0.7	4.1	5.1	5.5	32	53	103	0.765306	1	2	0
411624	1	0	1	2	23.8	2	29	2.04	1.06	4.6	5.17	5.4	11.6	62.24	97.6667	0.778731	1	3	0
405992	1	0	0	3	22.2	2	26	1.33	0.4	2.9	4.4	5.2	13	44	96	0.827586	1	4	0
407067	1	0	0	5	25.2	3	49	2.82	1.05	4.9	5	5.7	12	57	122.333	0.752809	3	0	0
406195	1	0	0	2	27.9	3	37	2.17	0.53	4.4	5	5.4	14	57	112.667	0.744898	1	3	0
406845	0	0	0	2	14.1	4	30	2.16	1.02	4.2	5.6	5.6	14	69	115.333	0.770833	1	2	0
406152	1	0	0	1	27.2	4	24	2.11	0.69	4.5	5.1	5.4	9	56	131.333	0.72549	1	0	0
400510	0	0	1	1	14.9	6	30	2.91	0.96	4.8	4.9	4.6	18	72	114.667	0.842136	1	6	0
401675	0	1	2	1	29.8	13	67	2.65	0.9	4.7	6.4	4.7	14	88	145	0.897411	3	3	1
401088	1	0	0	1	29.6	4	39	2.73	1.05	4.7	5.7	5.2	16	50	94	0.753455	1	2	0
403805	0	0	0	3	26.6	11	19	3.07	0.74	4.6	5	4.9	14	76	125.333	0.902913	1	3	0
402725	0	1	2	1	21.6	11	32	2.75	0.87	4.6	6	5.3	26	84	120	0.887019	1	2	0
403115	0	1	1	2	13	3	30	2.62	0.95	4.7	3.7	5.5	16	77	97.6667	0.836036	1	4	0
405478	1	0	0	2	28.8	4	51	2.05	0.97	4.1	4.3	5.1	22	51	100	0.810526	2	1	0
406120	0	2	0	1	33.6	16	72	4.69	2.4	7.3	5.3	5.8	16	68	150	1.05155	3	3	1
402702	0	1	0	1	37.2	22	75	2.51	2.14	4.7	5.5	5.4	9	94	99	0.959616	1	2	1
407283	0	2	0	1	21.5	9	66	3.15	0.79	5.6	5.8	6.1	13	77	160.333	0.885417	3	1	1
409530	0	1	1	4	27.9	15	72	3.5	1.14	5.7	6.8	6.3	9	71	115.667	0.943463	1	10	1
404752	1	0	0	2	34.5	8	53	2.63	1.45	4.8	5.4	4.9	14	57	133	0.817308	1	1	0
406009	1	0	0	1	33.8	8	44	2.66	1.6	4.6	5.5	5.5	16	47	109	0.874396	1	1	0
411800	1	0	0	1	37	9	76	2.38	1.66	4.7	4.7	5.7	12	56	131.667	0.960894	1	8	1
405060	1	0	0	3	28.3	5	30	2.43	0.75	4.1	5.1	4.9	23	49	121.667	0.787879	1	3	0
404788	1	0	0	3	34.8	8	44	2.29	0.91	4.3	5.9	5.3	13	63	112.667	0.792079	1	2	0
400303	1	0	0	2	39.3	15	61	3.58	0.99	6	5.9	5.1	14	63	147	0.880789	1	9	1
409840	1	0	0	1	34.5	11	63	2.43	0.82	4.1	5.37	6.9	12.18	47.82	165.667	0.922788	1	3	1
402498	1	0	0	1	38.1	14	59	2.6	3.17	4.7	6.41	6.3	5.26	56.33	141.333	0.925381	1	6	1
400738	0	0	0	3	27.5	14	68	3.63	1.62	4.6	7.6	7	11	62	120	0.929345	1	6	1
406590	1	0	0	1	29.8	6	54	2.26	1.4	4.8	5.1	5.5	6.95	56.74	119	0.909091	1	6	0
401755	1	0	0	1	31.7	4	59	3.46	1.91	6.4	8.2	5.5	15	57	141.333	0.807028	1	9	1
410819	1	0	0	5	37.1	10	49	2.57	0.68	5	4.8	5.7	16	68	113.333	0.897182	3	13	0
403189	0	2	0	1	34.5	26	70	2.76	3.08	5	5.5	5.7	16	63	155	0.903593	2	7	1
405299	1	0	0	1	27.6	4	45	2.47	0.86	4.9	5.3	4.8	11	66	122.667	0.765957	1	1	0
401527	1	0	0	1	31.7	6	42	2.59	0.82	4.8	5.2	5.2	9	52	108.667	0.841993	1	1	0
406149	1	0	0	1	29.4	6	27	2.11	0.49	4	5.62	5.4	76.26	50.12	119	0.878788	3	1	0
[truncated: 318 more rows]
