# Supplementary material for: Prediction of coronary heart disease in rural Chinese adults: a cross sectional study
Source: PeerJ. 2021 Oct 11;9:e12259. doi: 10.7717/peerj.12259 (PMC8515995; doi:10.7717/peerj.12259)
Supplement: Supplemental Information 4 [file peerj-09-12259-s004.xlsx]

## Sheet: trian_RF_result
ID	The probability of being classified as 0	The probability of being classified as 1	True classification result
400963	0	1	1
406089	0.0333333	0.966667	1
404452	0	1	1
400155	0	1	1
400269	0	1	1
403116	0.0133333	0.986667	1
407513	0.94	0.06	0
409641	1	0	0
405406	0	1	1
411786	0.993333	0.00666667	0
409610	0.98	0.02	0
400163	0	1	1
403784	0.98	0.02	0
410568	0.04	0.96	1
407625	0	1	1
401813	0	1	1
411072	0.973333	0.0266667	0
404432	0.0133333	0.986667	1
407151	0	1	1
400276	0.973333	0.0266667	0
402802	0.98	0.02	0
405855	0.0133333	0.986667	1
402387	0.0133333	0.986667	1
410647	0.88	0.12	0
411663	0	1	1
402176	0.0466667	0.953333	1
409585	0.946667	0.0533333	0
411675	1	0	0
410271	0.966667	0.0333333	0
404385	0.0266667	0.973333	1
400815	0	1	1
402650	0.333333	0.666667	1
407715	0.953333	0.0466667	0
402051	0.933333	0.0666667	0
411632	1	0	0
406265	0.986667	0.0133333	0
402424	0.906667	0.0933333	0
403041	0.98	0.02	0
411761	0.02	0.98	1
409976	0	1	1
411661	0	1	1
410901	0	1	1
407253	0.92	0.08	0
402834	0.0333333	0.966667	1
409824	0.0133333	0.986667	1
401492	0	1	1
400989	0.02	0.98	1
409596	0.973333	0.0266667	0
411381	0.32	0.68	1
400348	0.986667	0.0133333	0
407838	1	0	0
405388	1	0	0
409826	0.00666667	0.993333	1
404958	0.18	0.82	1
407695	0.00666667	0.993333	1
410351	0	1	1
409603	0.0466667	0.953333	1
404836	0	1	1
407075	0	1	1
400084	0.266667	0.733333	1
408460	0.0266667	0.973333	1
405193	1	0	0
400198	0.96	0.04	0
411132	0.793333	0.206667	0
408040	1	0	0
400653	0.986667	0.0133333	0
411368	0.94	0.06	0
404042	0.993333	0.00666667	0
407781	0.973333	0.0266667	0
403840	1	0	0
410609	0.98	0.02	0
400405	0.933333	0.0666667	0
407682	0.173333	0.826667	1
400683	0	1	1
403405	0	1	1
410659	0.0466667	0.953333	1
402950	0.886667	0.113333	0
410608	0.213333	0.786667	1
402136	0.9	0.1	0
402131	1	0	0
402588	0.966667	0.0333333	0
400779	0.96	0.04	0
402808	1	0	0
400713	1	0	0
405057	0.94	0.06	0
408026	0	1	1
401785	0.00666667	0.993333	1
407198	0.98	0.02	0
408610	0.986667	0.0133333	0
407466	0.986667	0.0133333	0
410198	0	1	1
408314	0	1	1
409996	0.0266667	0.973333	1
407693	0	1	1
407251	0	1	1
407200	0.00666667	0.993333	1
404770	0.98	0.02	0
405263	1	0	0
410681	0.96	0.04	0
408414	1	0	0
401547	1	0	0
403074	0.873333	0.126667	0
407153	0.82	0.18	0
403768	0.966667	0.0333333	0
400280	0.973333	0.0266667	0
407460	0.94	0.06	0
410944	0.00666667	0.993333	1
400207	0.0933333	0.906667	1
408017	0.0466667	0.953333	1
408224	0.653333	0.346667	0
409765	0.00666667	0.993333	1
400302	0.0133333	0.986667	1
411745	0.94	0.06	0
401133	0.00666667	0.993333	1
404584	0.906667	0.0933333	0
404521	0.993333	0.00666667	0
401806	0.98	0.02	0
411204	0.966667	0.0333333	0
406908	0.986667	0.0133333	0
400194	0.28	0.72	1
401757	0	1	1
407034	0.0133333	0.986667	1
402126	0	1	1
406359	0.04	0.96	1
406033	0.873333	0.126667	0
408491	0.126667	0.873333	1
409866	0.18	0.82	1
405018	0.22	0.78	1
406239	0.98	0.02	0
410226	0.913333	0.0866667	0
407050	0.993333	0.00666667	0
409567	0.993333	0.00666667	0
406934	0.986667	0.0133333	0
407458	0.993333	0.00666667	0
403463	1	0	0
411669	0	1	1
402042	0.98	0.02	0
407104	0.28	0.72	1
403514	0.98	0.02	0
407780	0	1	1
401003	0	1	1
409939	0.82	0.18	0
401432	0	1	1
407864	0.02	0.98	1
411802	0.98	0.02	0
407427	0.96	0.04	0
405042	0.953333	0.0466667	0
401392	0	1	1
404638	1	0	0
403843	0.953333	0.0466667	0
401361	0	1	1
401218	1	0	0
405377	0.126667	0.873333	1
402503	0.993333	0.00666667	0
410574	0.946667	0.0533333	0
409945	0	1	1
404556	0.986667	0.0133333	0
407270	0.98	0.02	0
407167	0.973333	0.0266667	0
409553	1	0	0
406763	0.993333	0.00666667	0
409639	0.906667	0.0933333	0
407808	0.993333	0.00666667	0
403509	1	0	0
404873	0	1	1
403792	1	0	0
408057	1	0	0
407360	0.953333	0.0466667	0
410746	0.9	0.1	0
403778	1	0	0
404210	0.926667	0.0733333	0
402469	0	1	1
411554	0	1	1
404461	0.993333	0.00666667	0
402155	0.0133333	0.986667	1
410769	0.953333	0.0466667	0
410694	0.9	0.1	0
408450	0	1	1
407025	0	1	1
410551	0.94	0.06	0
410109	0.953333	0.0466667	0
401798	0.06	0.94	1
402161	0.02	0.98	1
411325	0.98	0.02	0
400161	0	1	1
400290	0	1	1
403831	1	0	0
407254	0.913333	0.0866667	0
400627	0.98	0.02	0
410645	0.893333	0.106667	0
407011	0	1	1
400345	1	0	0
407105	0.84	0.16	0
411464	1	0	0
402182	0.926667	0.0733333	0
410673	0.98	0.02	0
401435	0.966667	0.0333333	0
401117	0.94	0.06	0
403984	1	0	0
401682	0.94	0.06	0
403631	0.98	0.02	0
406518	1	0	0
402989	1	0	0
410620	0.96	0.04	0
408246	0.993333	0.00666667	0
403693	0.393333	0.606667	1
402735	0.92	0.08	0
406224	1	0	0
403970	0.993333	0.00666667	0
407675	0.993333	0.00666667	0
407048	0.98	0.02	0
406293	0.986667	0.0133333	0
411342	0.106667	0.893333	1
405253	0.133333	0.866667	1
405213	0	1	1
407654	0	1	1
409678	0	1	1
410394	0	1	1
404630	1	0	0
410130	0.06	0.94	1
403034	0.986667	0.0133333	0
403220	0	1	1
408471	0.0133333	0.986667	1
400398	0.98	0.02	0
407931	0.0866667	0.913333	1
405359	0	1	1
402553	0	1	1
410234	0	1	1
406141	0.986667	0.0133333	0
411275	0.02	0.98	1
406280	0.96	0.04	0
408355	0.0133333	0.986667	1
410221	0	1	1
408473	0.986667	0.0133333	0
400056	1	0	0
410071	0.926667	0.0733333	0
404411	0.926667	0.0733333	0
405260	0.993333	0.00666667	0
402625	0.993333	0.00666667	0
411095	0.993333	0.00666667	0
404409	1	0	0
405787	0.986667	0.0133333	0
400475	0.933333	0.0666667	0
406148	0.98	0.02	0
404127	0.993333	0.00666667	0
400429	1	0	0
407776	0.973333	0.0266667	0
401397	0.0133333	0.986667	1
407059	0.993333	0.00666667	0
404178	1	0	0
403841	1	0	0
401153	1	0	0
403833	1	0	0
408412	0.0133333	0.986667	1
408325	0.00666667	0.993333	1
410622	1	0	0
402300	1	0	0
404191	0	1	1
410863	0	1	1
404078	1	0	0
411563	0.18	0.82	1
411689	0	1	1
400478	0.993333	0.00666667	0
407495	1	0	0
408600	0.966667	0.0333333	0
400313	0	1	1
407802	0.173333	0.826667	1
400132	0	1	1
400406	0	1	1
402481	0.306667	0.693333	1
400858	0	1	1
405245	0.0933333	0.906667	1
401585	1	0	0
408167	0.9	0.1	0
402881	0.986667	0.0133333	0
402708	0	1	1
411043	1	0	0
411178	0.94	0.06	0
406500	1	0	0
405399	0.233333	0.766667	1
403511	1	0	0
403566	0.9	0.1	0
403423	1	0	0
409735	0.993333	0.00666667	0
400958	0.98	0.02	0
406297	0.98	0.02	0
408030	1	0	0
404136	0.233333	0.766667	1
400589	0.993333	0.00666667	0
401113	0.986667	0.0133333	0
408100	0.993333	0.00666667	0
405022	0.986667	0.0133333	0
402243	0.98	0.02	0
411642	0.36	0.64	1
410475	0.986667	0.0133333	0
400190	0.98	0.02	0
411633	0.993333	0.00666667	0
405227	1	0	0
403353	0.00666667	0.993333	1
402513	0.38	0.62	1
401783	1	0	0
410025	1	0	0
402542	0.953333	0.0466667	0
402106	1	0	0
409825	0.00666667	0.993333	1
406267	0	1	1
404071	0	1	1
406614	0.0133333	0.986667	1
407704	0	1	1
407928	1	0	0
410205	0	1	1
402372	0.886667	0.113333	0
407745	0	1	1
404682	0.766667	0.233333	0
405439	0.0266667	0.973333	1
411102	0.306667	0.693333	1
402687	0.00666667	0.993333	1
404068	0.00666667	0.993333	1
409625	0.98	0.02	0
403959	1	0	0
411103	1	0	0
402397	0.84	0.16	0
402954	1	0	0
404931	1	0	0
402457	1	0	0
402594	0	1	1
400272	0.00666667	0.993333	1
406847	1	0	0
410527	0.0133333	0.986667	1
411465	1	0	0
408267	0.926667	0.0733333	0
411649	0.986667	0.0133333	0
406860	0.0466667	0.953333	1
403731	0.913333	0.0866667	0
402019	1	0	0
402784	0	1	1
403990	0.98	0.02	0
410607	0.946667	0.0533333	0
411038	0.966667	0.0333333	0
403905	0.986667	0.0133333	0
400467	1	0	0
400502	0.913333	0.0866667	0
402544	1	0	0
400200	1	0	0
402658	0.913333	0.0866667	0
405717	1	0	0
408225	0.986667	0.0133333	0
405262	1	0	0
405983	1	0	0
407333	1	0	0
403192	1	0	0
405740	0.973333	0.0266667	0
409575	0.993333	0.00666667	0
408228	1	0	0
410807	0.94	0.06	0
409651	0.986667	0.0133333	0
409756	1	0	0
403846	0.993333	0.00666667	0
410066	0.24	0.76	1
407371	0.98	0.02	0
405601	1	0	0
400867	0.966667	0.0333333	0
403346	0	1	1
400088	0	1	1
405921	0.88	0.12	0
402936	0.866667	0.133333	0
410712	0.893333	0.106667	0
406815	0.0133333	0.986667	1
404772	0.02	0.98	1
411562	0.933333	0.0666667	0
401875	0	1	1
403069	0	1	1
406289	0.94	0.06	0
411277	0.973333	0.0266667	0
404959	0	1	1
404293	0.00666667	0.993333	1
404629	0.966667	0.0333333	0
405352	0.846667	0.153333	0
410606	1	0	0
411530	0.82	0.18	0
407647	0.00666667	0.993333	1
407209	0	1	1
411108	0.946667	0.0533333	0
404754	0	1	1
406268	1	0	0
403087	0.04	0.96	1
404014	0	1	1
402710	0.253333	0.746667	1
404277	0.96	0.04	0
407499	0	1	1
403155	0.0466667	0.953333	1
408517	0.966667	0.0333333	0
402919	0.126667	0.873333	1
406092	0	1	1
402306	0.993333	0.00666667	0
410852	0.0266667	0.973333	1
409863	0.946667	0.0533333	0
401763	0.12	0.88	1
405224	1	0	0
403046	0.0133333	0.986667	1
405858	1	0	0
400340	1	0	0
400333	0.0133333	0.986667	1
405083	1	0	0
407385	0.973333	0.0266667	0
407506	0	1	1
403438	0	1	1
407634	0.98	0.02	0
403765	1	0	0
407429	1	0	0
403593	0.946667	0.0533333	0
402779	1	0	0
408093	1	0	0
402366	1	0	0
405805	1	0	0
402029	0.966667	0.0333333	0
409653	0.886667	0.113333	0
401702	1	0	0
406263	1	0	0
405069	1	0	0
411691	0.0866667	0.913333	1
400293	0.0466667	0.953333	1
406646	0.00666667	0.993333	1
408014	0.906667	0.0933333	0
404821	0	1	1
410344	0.96	0.04	0
410942	0.406667	0.593333	1
406757	1	0	0
401619	0	1	1
403861	1	0	0
403900	0.153333	0.846667	1
411821	0.253333	0.746667	1
409519	0.0133333	0.986667	1
402923	0	1	1
404833	0	1	1
402036	0.953333	0.0466667	0
403761	0.966667	0.0333333	0
400352	0.973333	0.0266667	0
403512	0.9	0.1	0
402515	1	0	0
411347	0.00666667	0.993333	1
405310	0.933333	0.0666667	0
410644	0.88	0.12	0
411609	0.333333	0.666667	1
407615	0.00666667	0.993333	1
400546	1	0	0
403088	0.3	0.7	1
408312	1	0	0
406284	0.366667	0.633333	1
405199	1	0	0
403660	0.986667	0.0133333	0
411518	0.986667	0.0133333	0
402761	0.933333	0.0666667	0
404566	0	1	1
407767	0.926667	0.0733333	0
406748	1	0	0
408235	0.02	0.98	1
409595	1	0	0
405047	0.273333	0.726667	1
401389	0.266667	0.733333	1
411226	0.986667	0.0133333	0
410813	0.886667	0.113333	0
401953	0.98	0.02	0
404890	0.2	0.8	1
404872	1	0	0
407981	1	0	0
401528	0.973333	0.0266667	0
406051	0.966667	0.0333333	0
403248	0.986667	0.0133333	0
411590	1	0	0
401649	0	1	1
402486	0.926667	0.0733333	0
403402	0	1	1
400414	0.413333	0.586667	1
403393	0.793333	0.206667	0
403758	0.973333	0.0266667	0
404261	1	0	0
400368	0.00666667	0.993333	1
401977	0	1	1
403834	0.966667	0.0333333	0
401288	0	1	1
411425	0.993333	0.00666667	0
404898	1	0	0
402105	1	0	0
409926	0.00666667	0.993333	1
402568	0.0133333	0.986667	1
410212	0	1	1
404712	0.993333	0.00666667	0
409648	0.36	0.64	1
410909	0.993333	0.00666667	0
410138	0.00666667	0.993333	1
400199	0	1	1
404681	0.00666667	0.993333	1
406521	1	0	0
400495	0.993333	0.00666667	0
407156	0.00666667	0.993333	1
405952	0.233333	0.766667	1
408175	0.0333333	0.966667	1
402432	0.226667	0.773333	1
405540	0.92	0.08	0
401491	0.86	0.14	0
403858	0.0266667	0.973333	1
403601	0.993333	0.00666667	0
407998	0.00666667	0.993333	1
403607	0.966667	0.0333333	0
403453	1	0	0
402817	0.986667	0.0133333	0
406850	0.06	0.94	1
407612	0.98	0.02	0
408142	0	1	1
400150	1	0	0
411798	0	1	1
407500	0.966667	0.0333333	0
406331	0.98	0.02	0
402195	1	0	0
400217	0.9	0.1	0
400749	0.993333	0.00666667	0
411416	0	1	1
408541	0.96	0.04	0
406537	1	0	0
406607	0.04	0.96	1
402753	0.953333	0.0466667	0
406754	1	0	0
405416	0.993333	0.00666667	0
401122	0.993333	0.00666667	0
410166	0	1	1
409991	0.00666667	0.993333	1
400621	1	0	0
404478	0.0733333	0.926667	1
406495	1	0	0
404008	0.993333	0.00666667	0
409701	0.333333	0.666667	1
402623	1	0	0
404395	1	0	0
409706	0.28	0.72	1
404704	0.993333	0.00666667	0
410871	1	0	0
401940	0.973333	0.0266667	0
406348	1	0	0
406228	0.853333	0.146667	0
404520	1	0	0
407861	1	0	0
410484	1	0	0
411543	1	0	0
405195	1	0	0
404387	0.913333	0.0866667	0
400868	1	0	0
410442	0	1	1
400058	0.00666667	0.993333	1
401744	1	0	0
406039	0.966667	0.0333333	0
408574	1	0	0
403936	1	0	0
410616	0.886667	0.113333	0
405843	0	1	1
400466	0.98	0.02	0
406330	0.186667	0.813333	1
407294	0.00666667	0.993333	1
411817	0.986667	0.0133333	0
404612	0.0333333	0.966667	1
407185	0.96	0.04	0
401570	0	1	1
406428	0.9	0.1	0
400370	0.993333	0.00666667	0
404727	0	1	1
400498	0.966667	0.0333333	0
401416	0	1	1
403976	1	0	0
410511	0.0533333	0.946667	1
410265	0.953333	0.0466667	0
400891	0.00666667	0.993333	1
401214	0.993333	0.00666667	0
410728	0.893333	0.106667	0
404230	0.0266667	0.973333	1
402025	0.06	0.94	1
403762	0.0266667	0.973333	1
403728	0.946667	0.0533333	0
401229	0	1	1
408487	0.0133333	0.986667	1
405801	0.0333333	0.966667	1
400802	0.98	0.02	0
411314	0	1	1
411233	0.986667	0.0133333	0
411516	0.00666667	0.993333	1
406243	0.84	0.16	0
400182	0.993333	0.00666667	0
406996	0.00666667	0.993333	1
404582	0.00666667	0.993333	1
406588	0.00666667	0.993333	1
400577	0.02	0.98	1
411036	0.846667	0.153333	0
404837	1	0	0
406508	0.88	0.12	0
410020	0.06	0.94	1
403343	0	1	1
406798	0.986667	0.0133333	0
402403	1	0	0
400852	0.993333	0.00666667	0
405559	0	1	1
400950	0	1	1
403736	0.973333	0.0266667	0
404368	1	0	0
405229	0	1	1
402901	1	0	0
405336	0.993333	0.00666667	0
407211	0.953333	0.0466667	0
403722	1	0	0
410380	0.00666667	0.993333	1
404306	0.98	0.02	0
406022	1	0	0
405962	0.866667	0.133333	0
408124	0.993333	0.00666667	0
404826	1	0	0
404392	0.246667	0.753333	1
410023	1	0	0
406150	0.00666667	0.993333	1
401683	1	0	0
411686	1	0	0
402722	1	0	0
411629	0.986667	0.0133333	0
411334	0.92	0.08	0
411619	0.966667	0.0333333	0
404967	1	0	0
409862	0.86	0.14	0
402073	0.98	0.02	0
402759	1	0	0
406608	0.313333	0.686667	1
406634	1	0	0
407935	1	0	0
403575	0.993333	0.00666667	0
404405	1	0	0
406305	0	1	1
401678	0.986667	0.0133333	0
406667	0	1	1
411780	0	1	1
411070	0.973333	0.0266667	0
410613	0.993333	0.00666667	0
400787	0.0466667	0.953333	1
401866	0.94	0.06	0
402118	1	0	0
411475	0.873333	0.126667	0
405926	1	0	0
404157	0	1	1
411764	0.00666667	0.993333	1
400378	0.313333	0.686667	1
402208	0	1	1
409913	0.0266667	0.973333	1
407256	0.866667	0.133333	0
406185	0.993333	0.00666667	0
407639	0.0333333	0.966667	1
405567	0.926667	0.0733333	0
406419	1	0	0
402391	0.88	0.12	0
410733	1	0	0
402523	0	1	1
406117	0	1	1
403325	0.873333	0.126667	0
403401	0	1	1
411080	0.993333	0.00666667	0
402302	0.866667	0.133333	0
411662	0.0733333	0.926667	1
401330	0.00666667	0.993333	1
410350	0.126667	0.873333	1
408125	0.96	0.04	0
410458	0	1	1
401650	1	0	0
404616	0.986667	0.0133333	0
406978	0.0133333	0.986667	1
403887	0.986667	0.0133333	0
402770	1	0	0
411620	1	0	0
408528	1	0	0
411503	0.826667	0.173333	0
405995	0.993333	0.00666667	0
405793	0	1	1
407844	0.98	0.02	0
408049	1	0	0
410248	1	0	0
400077	0	1	1
403892	0.98	0.02	0
410153	0.98	0.02	0
406271	1	0	0
405236	1	0	0
401962	0.953333	0.0466667	0
409736	1	0	0
406743	1	0	0
401038	0	1	1
406274	0.02	0.98	1
400847	0.893333	0.106667	0
406157	0.96	0.04	0
406522	1	0	0
407493	0.98	0.02	0
408138	1	0	0
405200	1	0	0
401665	1	0	0
405108	0.98	0.02	0
408135	1	0	0
403923	1	0	0
409612	0.993333	0.00666667	0
407752	0.913333	0.0866667	0
410272	0	1	1
407052	0.16	0.84	1
406292	0.00666667	0.993333	1
407223	0.0133333	0.986667	1
406553	0	1	1
401587	0	1	1
400329	0.973333	0.0266667	0
402251	0.86	0.14	0
403895	0.9	0.1	0
408273	0	1	1
404954	1	0	0
404599	0	1	1
410430	0.00666667	0.993333	1
411720	0.00666667	0.993333	1
403696	1	0	0
404633	0.986667	0.0133333	0
402183	0.00666667	0.993333	1
407541	0.00666667	0.993333	1
411083	0.00666667	0.993333	1
402972	0	1	1
408370	0	1	1
404881	0.0266667	0.973333	1
409676	1	0	0
402973	0.953333	0.0466667	0
406317	0.98	0.02	0
410553	0	1	1
405189	1	0	0
411526	0.893333	0.106667	0
411299	0	1	1
405986	0.96	0.04	0
410510	0.113333	0.886667	1
405994	1	0	0
402352	0.993333	0.00666667	0
411395	0.973333	0.0266667	0
402876	1	0	0
406088	0.273333	0.726667	1
402133	0.153333	0.846667	1
404460	1	0	0
403954	0.98	0.02	0
409656	0.326667	0.673333	1
404465	0	1	1
407645	0.00666667	0.993333	1
410116	0.973333	0.0266667	0
402455	0.886667	0.113333	0
406024	0.993333	0.00666667	0
403605	0.78	0.22	0
402613	0.993333	0.00666667	0
406485	1	0	0
400857	0	1	1
404589	1	0	0
404459	0.98	0.02	0
403291	0.993333	0.00666667	0
411149	0.993333	0.00666667	0
406020	0.993333	0.00666667	0
410815	0	1	1
410283	0	1	1
407129	0.993333	0.00666667	0
404095	1	0	0
405343	0.793333	0.206667	0
406138	1	0	0
400320	0.98	0.02	0
410067	0.993333	0.00666667	0
411428	0.993333	0.00666667	0
403726	1	0	0
411736	0.94	0.06	0
405219	0.973333	0.0266667	0
402603	1	0	0
405039	1	0	0
407472	0.993333	0.00666667	0
400070	1	0	0
410917	1	0	0
402853	0.993333	0.00666667	0
404067	0.0733333	0.926667	1
411481	0	1	1
408548	1	0	0
400149	0	1	1
409928	0.00666667	0.993333	1
405096	0.0466667	0.953333	1
404777	0.0133333	0.986667	1
406312	0.946667	0.0533333	0
410973	1	0	0
408198	0	1	1
400811	0.00666667	0.993333	1
404891	1	0	0
401841	0.993333	0.00666667	0
404408	0.966667	0.0333333	0
404792	0.986667	0.0133333	0
404515	0.986667	0.0133333	0
406891	0.986667	0.0133333	0
410413	0.326667	0.673333	1
406742	0.933333	0.0666667	0
408439	0.0133333	0.986667	1
411678	0.986667	0.0133333	0
411366	0.98	0.02	0
401006	0.926667	0.0733333	0
410052	0.02	0.98	1
405538	0.893333	0.106667	0
404718	1	0	0
401458	0.22	0.78	1
408480	0	1	1
400600	0	1	1
407470	0.986667	0.0133333	0
406645	0.966667	0.0333333	0
402959	0.00666667	0.993333	1
405863	1	0	0
405594	1	0	0
400460	1	0	0
410191	0.98	0.02	0
406000	0.966667	0.0333333	0
402107	1	0	0
411346	1	0	0
403865	1	0	0
403938	1	0	0
400452	0.993333	0.00666667	0
405846	1	0	0
402232	0.986667	0.0133333	0
400594	0.993333	0.00666667	0
406951	0	1	1
409514	0.78	0.22	0
411790	1	0	0
408247	0.993333	0.00666667	0
409600	0.966667	0.0333333	0
400383	0.00666667	0.993333	1
402293	0.946667	0.0533333	0
411085	0.993333	0.00666667	0
408118	1	0	0
406713	1	0	0
404563	1	0	0
411469	0.986667	0.0133333	0
409682	0.993333	0.00666667	0
407144	0.993333	0.00666667	0
402879	1	0	0
405297	1	0	0
408094	1	0	0
405448	1	0	0
406503	1	0	0
405555	0.973333	0.0266667	0
404948	0	1	1
409784	0.246667	0.753333	1
408220	0.94	0.06	0
403600	1	0	0
408597	0	1	1
402905	0	1	1
408371	0.00666667	0.993333	1
404428	0.98	0.02	0
404145	0.00666667	0.993333	1
410693	0.92	0.08	0
407024	0.946667	0.0533333	0
408213	0.0133333	0.986667	1
411695	0.926667	0.0733333	0
406488	0.846667	0.153333	0
403717	0.933333	0.0666667	0
401589	0.88	0.12	0
403665	0	1	1
408376	0	1	1
408253	0	1	1
407867	1	0	0
405182	1	0	0
411000	0.82	0.18	0
408505	0	1	1
406725	1	0	0
406706	0.993333	0.00666667	0
402152	0.00666667	0.993333	1
401618	1	0	0
411805	0.306667	0.693333	1
403884	1	0	0
410830	0	1	1
405557	1	0	0
409594	0.04	0.96	1
404765	0	1	1
408072	1	0	0
410550	0.773333	0.226667	0
406832	1	0	0
409985	0.993333	0.00666667	0
406976	0.98	0.02	0
410678	0.88	0.12	0
401195	1	0	0
402815	0.973333	0.0266667	0
406988	0.02	0.98	1
400558	1	0	0
404899	0.993333	0.00666667	0
406490	0	1	1
408227	0	1	1
407858	0.973333	0.0266667	0
401414	0.986667	0.0133333	0
403562	0.98	0.02	0
405616	0.973333	0.0266667	0
405220	0.946667	0.0533333	0
406363	0.986667	0.0133333	0
407856	1	0	0
401177	1	0	0
406659	1	0	0
404949	1	0	0
403874	1	0	0
410516	0	1	1
410814	0.84	0.16	0
404965	1	0	0
408212	0.00666667	0.993333	1
404902	0.96	0.04	0
407273	0.36	0.64	1
404338	0.926667	0.0733333	0
407887	1	0	0
405296	1	0	0
407816	1	0	0
400765	0.986667	0.0133333	0
409509	0.96	0.04	0
409917	1	0	0
406313	1	0	0
401759	0.00666667	0.993333	1
402505	0	1	1
410305	0	1	1
407183	0.933333	0.0666667	0
403916	0	1	1
407635	0	1	1
407697	0.193333	0.806667	1
405602	1	0	0
411536	0.893333	0.106667	0
411008	1	0	0
411825	0	1	1
402791	0.9	0.1	0
408349	1	0	0
406629	0.0133333	0.986667	1
402234	0.986667	0.0133333	0
400138	0.02	0.98	1
400853	1	0	0
404554	0	1	1
402267	1	0	0
406544	0.00666667	0.993333	1
411521	1	0	0
406194	1	0	0
406080	0.76	0.24	0
411496	0	1	1
405941	0	1	1
402504	0.0133333	0.986667	1
401064	0.0533333	0.946667	1
403746	0.993333	0.00666667	0
411519	0.953333	0.0466667	0
411208	0.986667	0.0133333	0
404209	0.96	0.04	0
405371	0.886667	0.113333	0
403276	0	1	1
410905	0	1	1
405947	0	1	1
408343	0	1	1
401575	0.993333	0.00666667	0
405973	0.993333	0.00666667	0
410379	0.993333	0.00666667	0
402002	0.0333333	0.966667	1
400935	1	0	0
411099	1	0	0
403548	0.986667	0.0133333	0
405510	0.946667	0.0533333	0
401322	1	0	0
411181	0	1	1
403849	1	0	0
407954	0.986667	0.0133333	0
402878	1	0	0
408099	1	0	0
411607	0.98	0.02	0
406848	0.993333	0.00666667	0
406730	0.993333	0.00666667	0
405889	0.0133333	0.986667	1
400501	1	0	0
405850	0	1	1
403068	1	0	0
405746	1	0	0
404377	1	0	0
402247	0.993333	0.00666667	0
405187	1	0	0
405957	0.993333	0.00666667	0
404231	0.04	0.96	1
402875	1	0	0
410778	0.98	0.02	0
407551	1	0	0
401023	1	0	0
404596	1	0	0
411495	0.0933333	0.906667	1
406434	0.00666667	0.993333	1
406459	1	0	0
407876	1	0	0
407534	0.966667	0.0333333	0
406648	1	0	0
406890	1	0	0
405089	0.986667	0.0133333	0
405031	0.00666667	0.993333	1
411259	0.96	0.04	0
405355	0.886667	0.113333	0
407402	0.92	0.08	0
406019	0.253333	0.746667	1
405823	0	1	1
407529	0.82	0.18	0
411766	0	1	1
406696	0.00666667	0.993333	1
401620	0	1	1
407583	0	1	1
403541	1	0	0
409932	0.986667	0.0133333	0
405818	0.0133333	0.986667	1
404663	1	0	0
403452	0.946667	0.0533333	0
403847	0.866667	0.133333	0
411552	0.986667	0.0133333	0
408277	0	1	1
405142	1	0	0
409511	0.993333	0.00666667	0
408042	1	0	0
411610	0.986667	0.0133333	0
406432	1	0	0
403120	0.966667	0.0333333	0
411616	0.946667	0.0533333	0
407450	1	0	0
405210	0.986667	0.0133333	0
411826	0.34	0.66	1
410017	0.0533333	0.946667	1
410060	1	0	0
402851	0.98	0.02	0
403873	0.973333	0.0266667	0
408534	0.96	0.04	0
404019	0.113333	0.886667	1
405162	0.96	0.04	0
405993	1	0	0
406727	0.993333	0.00666667	0
403328	0.993333	0.00666667	0
404502	0.966667	0.0333333	0
402440	1	0	0
406062	0.96	0.04	0
410993	0.973333	0.0266667	0
403413	0.173333	0.826667	1
410599	0.94	0.06	0
402537	0.986667	0.0133333	0
400976	1	0	0
407327	0.106667	0.893333	1
403929	1	0	0
409882	0	1	1
409645	0.993333	0.00666667	0
408209	1	0	0
405154	1	0	0
405418	0.993333	0.00666667	0
409650	0.993333	0.00666667	0
407755	0.0133333	0.986667	1
410987	1	0	0
406504	1	0	0
400294	0.00666667	0.993333	1
406264	1	0	0
408210	0.933333	0.0666667	0
407703	0	1	1
400573	0	1	1
409851	0.0133333	0.986667	1
404854	1	0	0
404922	0.98	0.02	0
400318	0.0133333	0.986667	1
410817	0.933333	0.0666667	0
405643	0.64	0.36	0
404761	0	1	1
405899	0.96	0.04	0
404530	0	1	1
411195	0.00666667	0.993333	1
401506	0.766667	0.233333	0
409655	0.326667	0.673333	1
407750	0	1	1
402159	1	0	0
408121	0.86	0.14	0
400761	0.0533333	0.946667	1
404197	1	0	0
411499	0.98	0.02	0
411725	0.993333	0.00666667	0
408382	1	0	0
411438	0.253333	0.746667	1
407449	0	1	1
409624	0.00666667	0.993333	1
400554	1	0	0
410125	0.993333	0.00666667	0
410818	0.0666667	0.933333	1
406526	1	0	0
403879	1	0	0
404539	1	0	0
400929	1	0	0
404442	0	1	1
404735	1	0	0
406902	0	1	1
406613	0.986667	0.0133333	0
411531	0.226667	0.773333	1
402849	1	0	0
405958	1	0	0
407057	0	1	1
405668	0.313333	0.686667	1
407952	1	0	0
402835	1	0	0
406308	1	0	0
403579	0.993333	0.00666667	0
402310	0.986667	0.0133333	0
401809	0.993333	0.00666667	0
403946	1	0	0
401673	1	0	0
411814	0.98	0.02	0
408375	0.926667	0.0733333	0
404951	0.98	0.02	0
411252	1	0	0
406169	1	0	0
407932	1	0	0
406604	0.9	0.1	0
405016	0.966667	0.0333333	0
403475	0.98	0.02	0
400615	1	0	0
407292	0.993333	0.00666667	0
406221	0.993333	0.00666667	0
404838	0.973333	0.0266667	0
404052	0.98	0.02	0
409974	0	1	1
400274	0.913333	0.0866667	0
405266	0.993333	0.00666667	0
401760	0	1	1
406923	1	0	0
411453	0	1	1
407110	0.926667	0.0733333	0
409912	0.0133333	0.986667	1
402290	0.00666667	0.993333	1
406155	0.786667	0.213333	0
405094	0	1	1
404936	0.953333	0.0466667	0
408230	0.02	0.98	1
407452	0	1	1
404420	0	1	1
401495	0.726667	0.273333	0
406514	0.953333	0.0466667	0
409805	0	1	1
403013	0	1	1
400511	1	0	0
401210	0	1	1
411470	1	0	0
405215	0.933333	0.0666667	0
404955	0.946667	0.0533333	0
405394	0.293333	0.706667	1
404725	0.993333	0.00666667	0
406622	0.953333	0.0466667	0
403081	0	1	1
402317	0.98	0.02	0
403386	0.00666667	0.993333	1
402599	0.946667	0.0533333	0
409777	0.0933333	0.906667	1
406301	0.02	0.98	1
400998	0	1	1
400775	0.88	0.12	0
403038	0	1	1
407922	1	0	0
405848	0.893333	0.106667	0
401083	0.233333	0.766667	1
405415	0.953333	0.0466667	0
407842	0.886667	0.113333	0
406112	1	0	0
403021	0.966667	0.0333333	0
400419	0.986667	0.0133333	0
401979	1	0	0
401633	1	0	0
407923	0.986667	0.0133333	0
405055	1	0	0
400821	0	1	1
409916	1	0	0
406807	0.00666667	0.993333	1
401138	0.953333	0.0466667	0
405971	1	0	0
403756	0.98	0.02	0
406133	1	0	0
406581	0.973333	0.0266667	0
409794	0.38	0.62	1
404794	0.0133333	0.986667	1
408120	0.0266667	0.973333	1
405943	0.00666667	0.993333	1
405431	0.88	0.12	0
409957	0.0133333	0.986667	1
401724	0.0133333	0.986667	1
402591	0.886667	0.113333	0
406593	0	1	1
407670	0.00666667	0.993333	1
402218	0.0266667	0.973333	1
404327	0.993333	0.00666667	0
404493	0.98	0.02	0
406294	1	0	0
405342	0.993333	0.00666667	0
411574	0	1	1
405205	0	1	1
408347	0.00666667	0.993333	1
408535	0.933333	0.0666667	0
406980	1	0	0
405165	0.953333	0.0466667	0
406316	1	0	0
400555	0.946667	0.0533333	0
405876	0.913333	0.0866667	0
402451	0.00666667	0.993333	1
407666	0.98	0.02	0
407788	0.18	0.82	1
403226	0	1	1
403867	0.973333	0.0266667	0
400326	0.893333	0.106667	0
404276	1	0	0
405293	1	0	0
410722	0.933333	0.0666667	0
403141	0	1	1
403502	0.993333	0.00666667	0
403421	0.993333	0.00666667	0
409909	0	1	1
403783	1	0	0
408338	1	0	0
404285	1	0	0
400490	0.993333	0.00666667	0
401869	0.993333	0.00666667	0
402163	0	1	1
408568	0.993333	0.00666667	0
405882	1	0	0
402994	1	0	0
405736	0.986667	0.0133333	0
411601	1	0	0
408590	0.993333	0.00666667	0
401343	0.973333	0.0266667	0
402958	0.28	0.72	1
407414	0.96	0.04	0
402968	0.986667	0.0133333	0
405551	0.993333	0.00666667	0
411291	1	0	0
410227	1	0	0
404581	0.893333	0.106667	0
407197	0.926667	0.0733333	0
406823	0.973333	0.0266667	0
409526	0.886667	0.113333	0
407227	0	1	1
406208	0.986667	0.0133333	0
411005	0	1	1
410165	0	1	1
405454	0.986667	0.0133333	0
403143	0.0666667	0.933333	1
403650	0.733333	0.266667	0
400330	0.0333333	0.966667	1
404670	1	0	0
407284	1	0	0
410727	0	1	1
403395	0.00666667	0.993333	1
411575	0.833333	0.166667	0
404829	0.973333	0.0266667	0
409834	0.98	0.02	0
402407	0.993333	0.00666667	0
400739	1	0	0
402223	0	1	1
402248	0.866667	0.133333	0
405521	1	0	0
411022	0.96	0.04	0
405292	0.993333	0.00666667	0
405670	0.993333	0.00666667	0
400670	1	0	0
403223	0	1	1
401534	1	0	0
411373	1	0	0
407929	1	0	0
408555	0.993333	0.00666667	0
404050	0.993333	0.00666667	0
411659	0	1	1
407441	0.2	0.8	1
406719	1	0	0
408085	1	0	0
410755	1	0	0
403699	1	0	0
402622	0.0133333	0.986667	1
406616	1	0	0
406364	0.993333	0.00666667	0
411641	0	1	1
406510	1	0	0
404855	0.986667	0.0133333	0
411729	1	0	0
411265	1	0	0
411721	0	1	1
402466	0.993333	0.00666667	0
403349	0	1	1
402177	0	1	1
402346	0.986667	0.0133333	0
410438	0	1	1
405989	0.993333	0.00666667	0
403085	0	1	1
410749	0.0266667	0.973333	1
409762	0.0333333	0.966667	1
409681	0.36	0.64	1
405897	0	1	1
401412	0.02	0.98	1
411492	0	1	1
401079	0.986667	0.0133333	0
407293	0.993333	0.00666667	0
410149	0	1	1
405097	0.993333	0.00666667	0
405980	0.993333	0.00666667	0
409710	0.993333	0.00666667	0
409883	0.0133333	0.986667	1
411804	0.7	0.3	0
403394	0	1	1
403674	0.00666667	0.993333	1
400548	1	0	0
407152	0.173333	0.826667	1
404430	1	0	0
402641	1	0	0
403960	0.966667	0.0333333	0
406106	0	1	1
405389	0.00666667	0.993333	1
411559	0.166667	0.833333	1
405580	1	0	0
407445	1	0	0
401787	1	0	0
405578	1	0	0
411274	1	0	0
405585	0.993333	0.00666667	0
406315	1	0	0
406822	0.00666667	0.993333	1
403893	1	0	0
402393	1	0	0
406775	0.986667	0.0133333	0
402369	1	0	0
404920	1	0	0
405302	1	0	0
406162	1	0	0
406003	1	0	0
403692	1	0	0
403374	0	1	1
403351	1	0	0
406288	0	1	1
404771	0.16	0.84	1
406566	1	0	0
402969	0.0133333	0.986667	1
411570	0.0133333	0.986667	1
409542	1	0	0
411613	0	1	1
410841	0	1	1
410089	0	1	1
406402	1	0	0
404304	0.993333	0.00666667	0
408076	1	0	0
406747	1	0	0
402256	1	0	0
407182	1	0	0
406892	0.993333	0.00666667	0
401158	0.94	0.06	0
400512	0.826667	0.173333	0
402299	0.973333	0.0266667	0
408567	0.946667	0.0533333	0
401057	1	0	0
403416	0.333333	0.666667	1
407764	0.0133333	0.986667	1
408607	0.986667	0.0133333	0
405122	0.993333	0.00666667	0
403924	1	0	0
406241	0.00666667	0.993333	1
404880	0.986667	0.0133333	0
406960	1	0	0
405322	1	0	0
404585	0.953333	0.0466667	0
404396	1	0	0
402543	1	0	0
400550	1	0	0
401439	0	1	1
408353	0.08	0.92	1
403272	0	1	1
410933	0.826667	0.173333	0
410867	0.8	0.2	0
405600	1	0	0
410171	0	1	1
406204	0	1	1
402004	0	1	1
402993	0.933333	0.0666667	0
410637	0	1	1
406217	0.00666667	0.993333	1
408208	0.986667	0.0133333	0
410635	0	1	1
406691	1	0	0
406979	0.993333	0.00666667	0
403948	0.973333	0.0266667	0
401027	1	0	0
402427	0	1	1
400436	1	0	0
403896	1	0	0
409724	0.973333	0.0266667	0
409878	0.00666667	0.993333	1
405745	0.00666667	0.993333	1
408022	1	0	0
405065	1	0	0
403803	1	0	0
404504	1	0	0
411624	1	0	0
405992	1	0	0
407067	1	0	0
406845	1	0	0
406152	1	0	0
401675	0.0133333	0.986667	1
401088	1	0	0
402725	0.946667	0.0533333	0
403115	1	0	0
405478	0.993333	0.00666667	0
402702	0.0533333	0.946667	1
409530	0	1	1
404752	0.953333	0.0466667	0
406009	0.98	0.02	0
411800	0.2	0.8	1
405060	1	0	0
404788	0.98	0.02	0
400303	0	1	1
409840	0.02	0.98	1
402498	0.0133333	0.986667	1
400738	0.0533333	0.946667	1
406590	0.98	0.02	0
410819	0.946667	0.0533333	0
403189	0.00666667	0.993333	1
401527	1	0	0
402028	0	1	1
403779	0.973333	0.0266667	0
401789	1	0	0
406899	0.913333	0.0866667	0
401714	1	0	0
402014	0.00666667	0.993333	1
407312	0.986667	0.0133333	0
405450	0	1	1
400389	0.0266667	0.973333	1
406476	0.346667	0.653333	1
410362	0.993333	0.00666667	0
400461	0.96	0.04	0
411514	1	0	0
409802	0	1	1
404908	0.993333	0.00666667	0
405924	0.2	0.8	1
402917	0.0666667	0.933333	1
410945	1	0	0
405027	0	1	1
405840	0.28	0.72	1
401561	1	0	0
406874	1	0	0
405964	1	0	0
405194	1	0	0
411287	1	0	0
405583	0.986667	0.0133333	0
403188	0	1	1
401800	0.0266667	0.973333	1
409658	0.0133333	0.986667	1
401307	0.233333	0.766667	1
411727	0.00666667	0.993333	1
400097	0	1	1
410965	0.00666667	0.993333	1
402103	0.98	0.02	0
401470	0	1	1
402605	0	1	1
406700	1	0	0
405880	0.0133333	0.986667	1
403499	0.98	0.02	0
404997	1	0	0
406466	0	1	1
411710	0.913333	0.0866667	0
411218	0.866667	0.133333	0
404403	0.993333	0.00666667	0
407165	0	1	1
407739	0.00666667	0.993333	1
401501	0	1	1
406269	0	1	1
403554	1	0	0
401720	1	0	0
407521	1	0	0
404774	1	0	0
405438	1	0	0
409892	0.0133333	0.986667	1
402867	1	0	0
402740	0.973333	0.0266667	0
404044	0.933333	0.0666667	0
406968	0.966667	0.0333333	0
410869	1	0	0
404104	0	1	1
406735	0.973333	0.0266667	0
405581	1	0	0
406624	1	0	0
406774	1	0	0
403842	0.993333	0.00666667	0
406513	1	0	0
404979	0.993333	0.00666667	0
405726	1	0	0
405172	0.993333	0.00666667	0
411592	0	1	1
406726	1	0	0
404755	0.233333	0.766667	1
405699	0	1	1
401098	0.78	0.22	0
403793	1	0	0
409980	1	0	0
411670	0.98	0.02	0
404665	1	0	0
405752	1	0	0
401086	0.933333	0.0666667	0
400623	0.96	0.04	0
407005	0	1	1
409556	1	0	0
405014	1	0	0
404669	0.98	0.02	0
410946	1	0	0
403715	0.993333	0.00666667	0
410834	0.993333	0.00666667	0
402538	0	1	1
405433	0.273333	0.726667	1
411025	0.786667	0.213333	0
405498	0.933333	0.0666667	0
410436	0	1	1
404741	0.993333	0.00666667	0
405218	0.146667	0.853333	1
405630	0.9	0.1	0
401347	0.986667	0.0133333	0
407381	0.88	0.12	0
405185	0.933333	0.0666667	0
406861	0.366667	0.633333	1
401750	0.0666667	0.933333	1
402009	0.28	0.72	1
411364	1	0	0
403363	0.0466667	0.953333	1
407147	0.793333	0.206667	0
400470	0.993333	0.00666667	0
406527	1	0	0
406903	0.0133333	0.986667	1
402015	0.266667	0.733333	1
405990	0.00666667	0.993333	1
402780	0.0866667	0.913333	1
407892	1	0	0
411466	1	0	0
403204	0	1	1
404839	1	0	0
400647	1	0	0
407154	0.00666667	0.993333	1
409582	0	1	1
407378	0	1	1
411528	0.84	0.16	0
405477	0.96	0.04	0
406134	0.946667	0.0533333	0
406501	0.813333	0.186667	0
400455	0.866667	0.133333	0
400034	1	0	0
407344	0	1	1
400947	0	1	1
409690	0.993333	0.00666667	0
409827	0	1	1
401964	0	1	1
402974	0	1	1
401135	0	1	1
407834	0	1	1
406635	0.96	0.04	0
406099	0.833333	0.166667	0
401292	0	1	1
404893	0.913333	0.0866667	0
401441	0.02	0.98	1
409845	0	1	1
403918	0.993333	0.00666667	0
403648	1	0	0
411742	0.1	0.9	1
402856	0.993333	0.00666667	0
402633	0.893333	0.106667	0
408274	0.733333	0.266667	0
406711	0.986667	0.0133333	0
409590	1	0	0
401512	1	0	0
406885	1	0	0
407101	0.986667	0.0133333	0
405715	1	0	0
409771	0.0266667	0.973333	1
402565	1	0	0
407676	0	1	1
401896	0	1	1
400999	0	1	1
404506	0	1	1
403199	0.146667	0.853333	1
405048	0	1	1
402381	0.0133333	0.986667	1
406810	1	0	0
408018	1	0	0
411451	0.993333	0.00666667	0
407451	1	0	0
401582	0.166667	0.833333	1
411358	0.00666667	0.993333	1
401717	1	0	0
410947	0.993333	0.00666667	0
406054	1	0	0
410763	0.0266667	0.973333	1
400439	0.0266667	0.973333	1
411162	0.22	0.78	1
404756	0.946667	0.0533333	0
402926	0	1	1
407688	0	1	1
403657	0.966667	0.0333333	0
404444	0.953333	0.0466667	0
407181	0.0266667	0.973333	1
404211	1	0	0
406882	1	0	0
400139	0	1	1
410779	0.02	0.98	1
403216	0.00666667	0.993333	1
403408	0	1	1
404020	0.02	0.98	1
403477	0.866667	0.133333	0
400153	0.0133333	0.986667	1
410157	0	1	1
404858	1	0	0
409944	0	1	1
401091	0.966667	0.0333333	0
401735	0.0133333	0.986667	1
405495	0	1	1
406334	0	1	1
410929	0.986667	0.0133333	0
405695	1	0	0
405750	0	1	1
410225	0	1	1
409587	1	0	0
406564	1	0	0
407447	0	1	1
405652	0	1	1
410831	0.0933333	0.906667	1
406547	0.993333	0.00666667	0
410249	0	1	1
400679	0.0666667	0.933333	1
411443	0	1	1
403889	1	0	0
404618	0.02	0.98	1
401513	0.04	0.96	1
407606	0	1	1
403314	1	0	0
410988	0	1	1
401302	0.993333	0.00666667	0
402035	0.00666667	0.993333	1
406168	1	0	0
403292	0	1	1
408341	0.00666667	0.993333	1
